# Supplementary material for: Digestion of cooked meat proteins is slightly affected by age as assessed using the dynamic gastrointestinal TIM model and mass spectrometry
Source: Royal Society of Chemistry journal article supplement (doi:10.1039/c6fo00120c), 2016-01-01
Supplement: c6fo00120c1.xlsx [file c6fo00120c1.xlsx]

## Sheet: Tab_peptide_duodenum
Phosphorylase OS=Bos taurus GN=PYGM PE=3 SV=2
Accession	peptide sequence	Start_pos	end_pos	progenesis peptide number	Retention time (min)	Charge	m/z	Measured mass	Mass error (ppm)	Score	Description
F1MJ28|F1MJ28_BOVIN	APNDFNLKD	248	256	3039	30.4478	2	517.251	1032.49	-0.268786	50.35	Phosphorylase OS=Bos taurus GN=PYGM PE=3 SV=2
F1MJ28|F1MJ28_BOVIN	AIQLNDTHPS	334	343	2499	25.8766	2	548.275	1094.54	0.210663	53.75	Phosphorylase OS=Bos taurus GN=PYGM PE=3 SV=2
F1MJ28|F1MJ28_BOVIN	ILVDQER	352	358	2220	20.9138	2	436.745	871.476	-0.347913	41.04	Phosphorylase OS=Bos taurus GN=PYGM PE=3 SV=2
F1MJ28|F1MJ28_BOVIN	TNGITPR	483	489	840	11.5725	2	379.711	757.408	-0.0323823	42.85	Phosphorylase OS=Bos taurus GN=PYGM PE=3 SV=2
F1MJ28|F1MJ28_BOVIN	KVHINPN	554	560	2950	9.42912	2	411.235	820.455	-1.0346	53.38	Phosphorylase OS=Bos taurus GN=PYGM PE=3 SV=2
Triosephosphate isomerase OS=Bos taurus GN=TPI1 PE=2 SV=3
Accession	peptide sequence	Start_pos	end_pos	progenesis peptide number	Retention time (min)	Charge	m/z	Measured mass	Mass error (ppm)	Score	Description
Q5E956|TPIS_BOVIN	KNNLGEL	18	24	2120	26.2467	2	394.219	786.423	-0.18788	50.88	Triosephosphate isomerase OS=Bos taurus GN=TPI1 PE=2 SV=3
Q5E956|TPIS_BOVIN	AKVPADTEV	31	39	4820	22.2498	2	465.249	928.483	-3.63243	41.59	Triosephosphate isomerase OS=Bos taurus GN=TPI1 PE=2 SV=3
Q5E956|TPIS_BOVIN	AKVPADTEVV	31	40	1455	28.7825	2	514.785	1027.55	-0.349098	50.4	Triosephosphate isomerase OS=Bos taurus GN=TPI1 PE=2 SV=3
Q5E956|TPIS_BOVIN	GESDELIGQK	103	112	3321	22.7693	2	538.266	1074.52	-1.70915	63.31	Triosephosphate isomerase OS=Bos taurus GN=TPI1 PE=2 SV=3
Q5E956|TPIS_BOVIN	SNVSDAVAQ	194	202	5229	16.9958	2	445.714	889.413	-1.49964	57.13	Triosephosphate isomerase OS=Bos taurus GN=TPI1 PE=2 SV=3
Q5E956|TPIS_BOVIN	VGGASLKPE	231	239	5084	19.4225	2	429.237	856.459	-7.27476	51.83	Triosephosphate isomerase OS=Bos taurus GN=TPI1 PE=2 SV=3
Fructose-bisphosphate aldolase OS=Bos taurus GN=ALDOA PE=2 SV=1
Accession	peptide sequence	Start_pos	end_pos	progenesis peptide number	Retention time (min)	Charge	m/z	Measured mass	Mass error (ppm)	Score	Description
A6QLL8|A6QLL8_BOVIN	AADESTGSIA	31	40	1756	17.0656	2	461.211	920.408	-0.909136	58.65	Fructose-bisphosphate aldolase OS=Bos taurus GN=ALDOA PE=2 SV=1
A6QLL8|A6QLL8_BOVIN	AADESTGSIAK	31	41	572	12.8755	2	525.258	1048.5	-2.4986	66.52	Fructose-bisphosphate aldolase OS=Bos taurus GN=ALDOA PE=2 SV=1
A6QLL8|A6QLL8_BOVIN	RLQSIGTENTE	42	52	5655	22.8408	2	624.315	1246.61	-0.637988	63.51	Fructose-bisphosphate aldolase OS=Bos taurus GN=ALDOA PE=2 SV=1
A6QLL8|A6QLL8_BOVIN	RLQSIGTENTEEN	42	54	140	22.9148	2	745.857	1489.7	-1.24092	83.71	Fructose-bisphosphate aldolase OS=Bos taurus GN=ALDOA PE=2 SV=1
A6QLL8|A6QLL8_BOVIN	RLQSIGTENTEENR	42	55	1584	21.5867	3	549.607	1645.8	-0.883047	41.7	Fructose-bisphosphate aldolase OS=Bos taurus GN=ALDOA PE=2 SV=1
A6QLL8|A6QLL8_BOVIN	LQSIGTENTE	43	52	3994	25.0615	2	546.264	1090.51	-0.245164	64.18	Fructose-bisphosphate aldolase OS=Bos taurus GN=ALDOA PE=2 SV=1
A6QLL8|A6QLL8_BOVIN	LQSIGTENTEEN	43	54	55	25.0615	2	667.806	1333.6	-0.963984	106.3	Fructose-bisphosphate aldolase OS=Bos taurus GN=ALDOA PE=2 SV=1
A6QLL8|A6QLL8_BOVIN	LTADDRVNPC	63	72	392	25.6556	2	552.26	1102.51	-1.236	56.73	Fructose-bisphosphate aldolase OS=Bos taurus GN=ALDOA PE=2 SV=1
A6QLL8|A6QLL8_BOVIN	TADDRVNPC	64	72	192	15.8985	2	495.718	989.422	-1.24864	60.74	Fructose-bisphosphate aldolase OS=Bos taurus GN=ALDOA PE=2 SV=1
A6QLL8|A6QLL8_BOVIN	ADDGRPFPQ	87	95	39	22.6964	2	501.735	1001.46	-0.643301	53.73	Fructose-bisphosphate aldolase OS=Bos taurus GN=ALDOA PE=2 SV=1
A6QLL8|A6QLL8_BOVIN	AKGGVVGI	99	106	971	26.0253	2	350.721	699.427	-1.93293	43.62	Fructose-bisphosphate aldolase OS=Bos taurus GN=ALDOA PE=2 SV=1
A6QLL8|A6QLL8_BOVIN	AGTNGETTTQ	116	125	5884	5.34843	2	490.22	978.425	-0.884751	45.41	Fructose-bisphosphate aldolase OS=Bos taurus GN=ALDOA PE=2 SV=1
A6QLL8|A6QLL8_BOVIN	AGTNGETTTQGL	116	127	3424	22.8408	2	575.274	1148.53	1.26025	72.55	Fructose-bisphosphate aldolase OS=Bos taurus GN=ALDOA PE=2 SV=1
A6QLL8|A6QLL8_BOVIN	IGEHTPSS	153	160	168	11.5725	2	414.198	826.382	-0.218082	48.06	Fructose-bisphosphate aldolase OS=Bos taurus GN=ALDOA PE=2 SV=1
A6QLL8|A6QLL8_BOVIN	AIMENAN	162	168	4844	15.6061	2	381.676	761.338	-0.127664	45.67	Fructose-bisphosphate aldolase OS=Bos taurus GN=ALDOA PE=2 SV=1
A6QLL8|A6QLL8_BOVIN	AIMENANV	162	169	1187	30.9657	2	431.211	860.407	0.95795	45.79	Fructose-bisphosphate aldolase OS=Bos taurus GN=ALDOA PE=2 SV=1
A6QLL8|A6QLL8_BOVIN	ILPDGDHDLK	190	199	1041	25.4327	2	561.792	1121.57	-1.34196	46.55	Fructose-bisphosphate aldolase OS=Bos taurus GN=ALDOA PE=2 SV=1
A6QLL8|A6QLL8_BOVIN	KALSDHH	214	220	1555	2.8655	2	404.21	806.404	1.212	42.24	Fructose-bisphosphate aldolase OS=Bos taurus GN=ALDOA PE=2 SV=1
A6QLL8|A6QLL8_BOVIN	EGTLLKPN	224	231	470	22.4002	2	436.248	870.481	-0.299097	47.54	Fructose-bisphosphate aldolase OS=Bos taurus GN=ALDOA PE=2 SV=1
A6QLL8|A6QLL8_BOVIN	KYSHEEIA	242	249	991	14.0631	2	488.74	975.465	-1.21578	45.45	Fructose-bisphosphate aldolase OS=Bos taurus GN=ALDOA PE=2 SV=1
A6QLL8|A6QLL8_BOVIN	FLSGGQSEEEA	269	279	4194	27.8008	2	577.256	1152.5	3.16475	49.17	Fructose-bisphosphate aldolase OS=Bos taurus GN=ALDOA PE=2 SV=1
A6QLL8|A6QLL8_BOVIN	SGGQSEEEASI	271	281	4193	21.8059	2	547.235	1092.46	-0.807541	48.57	Fructose-bisphosphate aldolase OS=Bos taurus GN=ALDOA PE=2 SV=1
A6QLL8|A6QLL8_BOVIN	ALQASALK	304	311	5595	21.7348	2	401.245	800.476	0.300615	44.58	Fructose-bisphosphate aldolase OS=Bos taurus GN=ALDOA PE=2 SV=1
A6QLL8|A6QLL8_BOVIN	ALANSLACQGK	331	341	533	26.7668	2	538.281	1074.55	-2.2668	77.76	Fructose-bisphosphate aldolase OS=Bos taurus GN=ALDOA PE=2 SV=1
TNNI2 protein (Fragment) OS=Bos taurus GN=TNNI2 PE=2 SV=1
Accession	peptide sequence	Start_pos	end_pos	progenesis peptide number	Retention time (min)	Charge	m/z	Measured mass	Mass error (ppm)	Score	Description
A5PJM2|A5PJM2_BOVIN	IDAAEEEK	89	96	602	10.8208	2	452.718	903.422	3.83547	51.24	TNNI2 protein (Fragment) OS=Bos taurus GN=TNNI2 PE=2 SV=1
A5PJM2|A5PJM2_BOVIN	ELEDMNQ	109	115	1483	20.0156	2	439.682	877.349	-0.0126091	46.35	TNNI2 protein (Fragment) OS=Bos taurus GN=TNNI2 PE=2 SV=1
A5PJM2|A5PJM2_BOVIN	MSADAMLK	134	141	1557	29.7946	2	433.709	865.404	-0.209344	43.29	TNNI2 protein (Fragment) OS=Bos taurus GN=TNNI2 PE=2 SV=1
A5PJM2|A5PJM2_BOVIN	KKMFETES	192	199	2625	16.1922	2	500.245	998.475	1.14408	43.41	TNNI2 protein (Fragment) OS=Bos taurus GN=TNNI2 PE=2 SV=1
Adenylate kinase isoenzyme 1 OS=Bos taurus GN=AK1 PE=1 SV=2
Accession	peptide sequence	Start_pos	end_pos	progenesis peptide number	Retention time (min)	Charge	m/z	Measured mass	Mass error (ppm)	Score	Description
P00570|KAD1_BOVIN	EVQQGEEFE	97	105	4172	25.2824	2	547.735	1093.46	-0.882792	49.97	Adenylate kinase isoenzyme 1 OS=Bos taurus GN=AK1 PE=1 SV=2
P00570|KAD1_BOVIN	KVNAEGSVDNV	171	181	1683	21.5867	2	566.286	1130.56	0.942166	53.83	Adenylate kinase isoenzyme 1 OS=Bos taurus GN=AK1 PE=1 SV=2
Beta-enolase OS=Bos taurus GN=ENO3 PE=2 SV=1
Accession	peptide sequence	Start_pos	end_pos	progenesis peptide number	Retention time (min)	Charge	m/z	Measured mass	Mass error (ppm)	Score	Description
Q3ZC09|ENOB_BOVIN	GNPTVEV	15	21	703	26.6921	2	358.185	714.355	0.0316457	44.67	Beta-enolase OS=Bos taurus GN=ENO3 PE=2 SV=1
Q3ZC09|ENOB_BOVIN	AVEHIN	64	69	563	9.12667	2	341.679	681.344	-0.355441	47.24	Beta-enolase OS=Bos taurus GN=ENO3 PE=2 SV=1
Q3ZC09|ENOB_BOVIN	AVEHINK	64	70	505	6.84105	2	405.727	809.439	-0.25059	49.1	Beta-enolase OS=Bos taurus GN=ENO3 PE=2 SV=1
Q3ZC09|ENOB_BOVIN	KLSVVDQE	80	87	1149	22.7693	2	459.251	916.487	0.158186	52.59	Beta-enolase OS=Bos taurus GN=ENO3 PE=2 SV=1
Q3ZC09|ENOB_BOVIN	KLSVVDQEKVDK	80	91	308	21.5867	3	463.265	1386.77	0.896449	66.35	Beta-enolase OS=Bos taurus GN=ENO3 PE=2 SV=1
Q3ZC09|ENOB_BOVIN	LSVVDQEKVDK	81	91	2127	24.4761	2	630.346	1258.68	-0.26848	64.84	Beta-enolase OS=Bos taurus GN=ENO3 PE=2 SV=1
Q3ZC09|ENOB_BOVIN	SVVDQEKVDK	82	91	2557	24.6212	2	573.802	1145.59	-2.50119	43.15	Beta-enolase OS=Bos taurus GN=ENO3 PE=2 SV=1
Q3ZC09|ENOB_BOVIN	MIELDGTENK	93	102	29	30.0149	2	575.277	1148.54	1.32884	58.23	Beta-enolase OS=Bos taurus GN=ENO3 PE=2 SV=1
Q3ZC09|ENOB_BOVIN	MIELDGTENKS	93	103	127	29.8684	2	618.792	1235.57	-0.92748	74.87	Beta-enolase OS=Bos taurus GN=ENO3 PE=2 SV=1
Q3ZC09|ENOB_BOVIN	IELDGTENKS	94	103	2964	20.99	2	553.271	1104.53	-1.66838	51.34	Beta-enolase OS=Bos taurus GN=ENO3 PE=2 SV=1
Q3ZC09|ENOB_BOVIN	HIADLAGNPE	132	141	1238	26.6921	2	518.756	1035.5	-0.869182	44.14	Beta-enolase OS=Bos taurus GN=ENO3 PE=2 SV=1
Q3ZC09|ENOB_BOVIN	FNVINGGSHAGN	149	160	167	27.5801	2	593.783	1185.55	-0.939481	57.38	Beta-enolase OS=Bos taurus GN=ENO3 PE=2 SV=1
Q3ZC09|ENOB_BOVIN	FNVINGGSHAGNK	149	161	969	23.1335	2	657.83	1313.65	-1.34556	75.11	Beta-enolase OS=Bos taurus GN=ENO3 PE=2 SV=1
Q3ZC09|ENOB_BOVIN	NVINGGSHAGN	150	160	1537	11.7701	2	520.249	1038.48	-0.17556	57.16	Beta-enolase OS=Bos taurus GN=ENO3 PE=2 SV=1
Q3ZC09|ENOB_BOVIN	NVINGGSHAGNK	150	161	916	9.2037	2	584.297	1166.58	0.167856	65.96	Beta-enolase OS=Bos taurus GN=ENO3 PE=2 SV=1
Q3ZC09|ENOB_BOVIN	VINGGSHAGN	151	160	1402	5.79828	2	463.227	924.44	-1.28043	57.33	Beta-enolase OS=Bos taurus GN=ENO3 PE=2 SV=1
Q3ZC09|ENOB_BOVIN	GKDATNVGDEGGFAPN	200	215	1432	29.0033	2	774.849	1547.68	-1.65578	90.17	Beta-enolase OS=Bos taurus GN=ENO3 PE=2 SV=1
Q3ZC09|ENOB_BOVIN	NVGDEGGFAPN	205	215	2590	29.2919	2	538.736	1075.46	-0.185136	55.6	Beta-enolase OS=Bos taurus GN=ENO3 PE=2 SV=1
Q3ZC09|ENOB_BOVIN	LKTAIQ	226	231	5366	16.7092	2	337.216	672.417	-0.363695	42.53	Beta-enolase OS=Bos taurus GN=ENO3 PE=2 SV=1
Q3ZC09|ENOB_BOVIN	NGKYDLD	253	259	5668	17.431	2	412.694	823.374	3.08649	41.05	Beta-enolase OS=Bos taurus GN=ENO3 PE=2 SV=1
Q3ZC09|ENOB_BOVIN	GDDLTVTNPK	316	325	248	22.9148	2	530.269	1058.52	-0.403216	78.47	Beta-enolase OS=Bos taurus GN=ENO3 PE=2 SV=1
Q3ZC09|ENOB_BOVIN	IAQAVEKK	327	334	3420	7.19007	2	443.771	885.527	-1.3722	45.16	Beta-enolase OS=Bos taurus GN=ENO3 PE=2 SV=1
Q3ZC09|ENOB_BOVIN	KVNQIGSVTE	342	351	1937	23.4344	2	537.793	1073.57	-0.899224	61.33	Beta-enolase OS=Bos taurus GN=ENO3 PE=2 SV=1
Q3ZC09|ENOB_BOVIN	VNQIGSVTES	343	352	6975	25.5066	2	517.262	1032.51	0.635346	53.02	Beta-enolase OS=Bos taurus GN=ENO3 PE=2 SV=1
Q3ZC09|ENOB_BOVIN	MRIEEALGDK	410	419	939	31.2598	2	581.3	1160.59	-0.735838	61.07	Beta-enolase OS=Bos taurus GN=ENO3 PE=2 SV=1
Q3ZC09|ENOB_BOVIN	RIEEALGDK	411	419	2640	18.1682	2	515.778	1029.54	-3.1001	49.6	Beta-enolase OS=Bos taurus GN=ENO3 PE=2 SV=1
Q3ZC09|ENOB_BOVIN	IEEALGDK	412	419	336	18.2425	2	437.729	873.442	-2.11409	54.85	Beta-enolase OS=Bos taurus GN=ENO3 PE=2 SV=1
Q3ZC09|ENOB_BOVIN	IEEALGDKA	412	420	397	22.4743	2	473.247	944.48	-1.16009	63.36	Beta-enolase OS=Bos taurus GN=ENO3 PE=2 SV=1
Q3ZC09|ENOB_BOVIN	IEEALGDKAV	412	421	128	30.1569	2	522.784	1043.55	3.04159	73.24	Beta-enolase OS=Bos taurus GN=ENO3 PE=2 SV=1
Pyruvate kinase OS=Bos taurus GN=PKM2 PE=2 SV=1
Accession	peptide sequence	Start_pos	end_pos	progenesis peptide number	Retention time (min)	Charge	m/z	Measured mass	Mass error (ppm)	Score	Description
A5D984|A5D984_BOVIN	HHSDAGTA	3	10	2263	1.55955	2	398.172	794.33	-0.470562	44.09	Pyruvate kinase OS=Bos taurus GN=PKM2 PE=2 SV=1
A5D984|A5D984_BOVIN	HAETIK	83	88	756	3.66005	2	349.695	697.376	-0.407717	47.18	Pyruvate kinase OS=Bos taurus GN=PKM2 PE=2 SV=1
A5D984|A5D984_BOVIN	VVDVGSKI	166	173	2149	29.0033	2	408.745	815.475	-0.0867676	50.59	Pyruvate kinase OS=Bos taurus GN=PKM2 PE=2 SV=1
A5D984|A5D984_BOVIN	LVTEVENGGSLGSK	192	205	1760	30.227	2	695.362	1388.71	-3.16313	99.1	Pyruvate kinase OS=Bos taurus GN=PKM2 PE=2 SV=1
A5D984|A5D984_BOVIN	VTEVENGGSLGS	193	204	3403	24.6212	2	574.776	1147.54	0.925379	90.89	Pyruvate kinase OS=Bos taurus GN=PKM2 PE=2 SV=1
A5D984|A5D984_BOVIN	VTEVENGGSLGSK	193	205	688	20.8366	2	638.822	1275.63	-1.22079	95.72	Pyruvate kinase OS=Bos taurus GN=PKM2 PE=2 SV=1
A5D984|A5D984_BOVIN	EVENGGSLGSK	195	205	2299	12.7988	2	538.764	1075.51	-1.16001	58.09	Pyruvate kinase OS=Bos taurus GN=PKM2 PE=2 SV=1
A5D984|A5D984_BOVIN	ENGGSLGSK	197	205	5880	5.34843	2	424.709	847.404	0.806624	44.36	Pyruvate kinase OS=Bos taurus GN=PKM2 PE=2 SV=1
A5D984|A5D984_BOVIN	KGVNLPGAA	206	214	1362	27.5801	2	413.743	825.471	0.120473	52.59	Pyruvate kinase OS=Bos taurus GN=PKM2 PE=2 SV=1
A5D984|A5D984_BOVIN	KASDVHEV	246	253	1489	7.93718	2	442.727	883.439	-1.21985	54.13	Pyruvate kinase OS=Bos taurus GN=PKM2 PE=2 SV=1
A5D984|A5D984_BOVIN	AGKPVIC	319	325	1732	18.6099	2	344.197	686.379	0.289412	53.27	Pyruvate kinase OS=Bos taurus GN=PKM2 PE=2 SV=1
A5D984|A5D984_BOVIN	RAEGSDVANAV	341	351	1981	21.0646	2	544.77	1087.52	-0.891476	63.63	Pyruvate kinase OS=Bos taurus GN=PKM2 PE=2 SV=1
A5D984|A5D984_BOVIN	SGETAKGDYPLEA	361	373	2208	30.6707	2	669.313	1336.61	-2.36187	51.44	Pyruvate kinase OS=Bos taurus GN=PKM2 PE=2 SV=1
Phosphoglucomutase-1 OS=Bos taurus GN=PGM1 PE=2 SV=1
Accession	peptide sequence	Start_pos	end_pos	progenesis peptide number	Retention time (min)	Charge	m/z	Measured mass	Mass error (ppm)	Score	Description
Q08DP0|PGM1_BOVIN	AYQDQKPGTSGL	10	21	1878	25.5815	2	632.811	1263.61	-0.838377	51.4	Phosphoglucomutase-1 OS=Bos taurus GN=PGM1 PE=2 SV=1
Q08DP0|PGM1_BOVIN	DYEEVEAEGANK	428	439	5799	23.5842	2	677.294	1352.57	-0.452575	94.67	Phosphoglucomutase-1 OS=Bos taurus GN=PGM1 PE=2 SV=1
Q08DP0|PGM1_BOVIN	RLSGTGSAGAT	502	512	3523	10.0991	2	489.256	976.497	2.90353	64.63	Phosphoglucomutase-1 OS=Bos taurus GN=PGM1 PE=2 SV=1
Creatine kinase M-type OS=Bos taurus GN=CKM PE=1 SV=2
Accession	peptide sequence	Start_pos	end_pos	progenesis peptide number	Retention time (min)	Charge	m/z	Measured mass	Mass error (ppm)	Score	Description
Q9XSC6|KCRM_BOVIN	PFGNTHN	1	7	23	8.53028	2	393.68	785.345	-0.271515	42.22	Creatine kinase M-type OS=Bos taurus GN=CKM PE=1 SV=2
Q9XSC6|KCRM_BOVIN	PFGNTHNK	1	8	3693	5.87303	2	457.727	913.44	-0.916942	41.12	Creatine kinase M-type OS=Bos taurus GN=CKM PE=1 SV=2
Q9XSC6|KCRM_BOVIN	KAEEEYPDLSK	14	24	2387	24.2525	2	654.819	1307.62	-1.2315	69.84	Creatine kinase M-type OS=Bos taurus GN=CKM PE=1 SV=2
Q9XSC6|KCRM_BOVIN	AEEEYPDLSK	15	24	2756	27.8758	2	590.772	1179.53	-0.754693	67.57	Creatine kinase M-type OS=Bos taurus GN=CKM PE=1 SV=2
Q9XSC6|KCRM_BOVIN	DKETPSG	43	49	1334	3.36428	2	367.172	732.329	0.150671	46.72	Creatine kinase M-type OS=Bos taurus GN=CKM PE=1 SV=2
Q9XSC6|KCRM_BOVIN	DKETPSGF	43	50	542	21.8789	2	440.706	879.398	0.725948	58	Creatine kinase M-type OS=Bos taurus GN=CKM PE=1 SV=2
Q9XSC6|KCRM_BOVIN	GVDNPGHP	59	66	330	11.9891	2	396.685	791.356	-0.0778127	50	Creatine kinase M-type OS=Bos taurus GN=CKM PE=1 SV=2
Q9XSC6|KCRM_BOVIN	GVDNPGHPF	59	67	66	29.2919	2	470.219	938.424	-0.52176	42.59	Creatine kinase M-type OS=Bos taurus GN=CKM PE=1 SV=2
Q9XSC6|KCRM_BOVIN	HGGFKPTD	96	103	222	11.5725	2	429.709	857.403	-0.382677	47.06	Creatine kinase M-type OS=Bos taurus GN=CKM PE=1 SV=2
Q9XSC6|KCRM_BOVIN	HGGFKPTDK	96	104	1592	7.86248	2	493.756	985.497	-0.936196	56.97	Creatine kinase M-type OS=Bos taurus GN=CKM PE=1 SV=2
Q9XSC6|KCRM_BOVIN	HKTDLNHEN	105	113	3244	3.51095	2	554.262	1106.51	-1.36758	46.71	Creatine kinase M-type OS=Bos taurus GN=CKM PE=1 SV=2
Q9XSC6|KCRM_BOVIN	HKTDLNHENL	105	114	5138	16.637	2	610.803	1219.59	-1.92565	41.81	Creatine kinase M-type OS=Bos taurus GN=CKM PE=1 SV=2
Q9XSC6|KCRM_BOVIN	NSLTGEFKG	162	170	702	30.8179	2	476.74	951.465	-1.03832	44.27	Creatine kinase M-type OS=Bos taurus GN=CKM PE=1 SV=2
Q9XSC6|KCRM_BOVIN	SMTEQEQQ	177	184	4823	9.79668	2	490.703	979.391	-1.19836	52.95	Creatine kinase M-type OS=Bos taurus GN=CKM PE=1 SV=2
Q9XSC6|KCRM_BOVIN	SMTEQEQQQ	177	185	4518	10.7448	2	554.732	1107.45	-1.21374	58.03	Creatine kinase M-type OS=Bos taurus GN=CKM PE=1 SV=2
Q9XSC6|KCRM_BOVIN	SMTEQEQQQL	177	186	2405	27.2826	2	611.276	1220.54	2.45627	46.47	Creatine kinase M-type OS=Bos taurus GN=CKM PE=1 SV=2
Q9XSC6|KCRM_BOVIN	VISMEK	236	241	854	16.8513	2	353.694	705.373	-0.238644	41.63	Creatine kinase M-type OS=Bos taurus GN=CKM PE=1 SV=2
Q9XSC6|KCRM_BOVIN	DVSNADRLGSSEVE	334	347	7407	28.5537	2	739.341	1476.67	-1.10505	64.27	Creatine kinase M-type OS=Bos taurus GN=CKM PE=1 SV=2
Q9XSC6|KCRM_BOVIN	DVSNADRLGSSEVEQ	334	348	7714	28.7073	2	803.371	1604.73	-0.776762	92.04	Creatine kinase M-type OS=Bos taurus GN=CKM PE=1 SV=2
Q9XSC6|KCRM_BOVIN	DRLGSSEVEQV	339	349	3539	30.4478	2	609.801	1217.59	-1.84097	47.02	Creatine kinase M-type OS=Bos taurus GN=CKM PE=1 SV=2
Q9XSC6|KCRM_BOVIN	QLVVDGVK	350	357	1069	28.1022	2	429.258	856.502	0.308747	42.6	Creatine kinase M-type OS=Bos taurus GN=CKM PE=1 SV=2
Myosin regulatory light chain 2, skeletal muscle isoform OS=Bos taurus GN=MYLPF PE=2 SV=1
Accession	peptide sequence	Start_pos	end_pos	progenesis peptide number	Retention time (min)	Charge	m/z	Measured mass	Mass error (ppm)	Score	Description
Q0P571|MLRS_BOVIN	TVIDQNRDGIIDKE	35	48	1039	31.1108	3	539.28	1614.82	-1.59192	66.87	Myosin regulatory light chain 2, skeletal muscle isoform OS=Bos taurus GN=MYLPF PE=2 SV=1
Q0P571|MLRS_BOVIN	DGIIDK	42	47	2372	14.9305	2	330.682	659.349	-0.116472	46.01	Myosin regulatory light chain 2, skeletal muscle isoform OS=Bos taurus GN=MYLPF PE=2 SV=1
Q0P571|MLRS_BOVIN	LNVKNEELD	60	68	1320	27.8008	2	537.277	1072.54	-0.162138	47.53	Myosin regulatory light chain 2, skeletal muscle isoform OS=Bos taurus GN=MYLPF PE=2 SV=1
Q0P571|MLRS_BOVIN	LNVKNEELDA	60	69	801	30.8179	2	572.793	1143.57	-5.16381	61.56	Myosin regulatory light chain 2, skeletal muscle isoform OS=Bos taurus GN=MYLPF PE=2 SV=1
Q0P571|MLRS_BOVIN	LNVKNEELDAM	60	70	6259	29.5793	2	646.314	1290.61	0.950316	53.99	Myosin regulatory light chain 2, skeletal muscle isoform OS=Bos taurus GN=MYLPF PE=2 SV=1
Q0P571|MLRS_BOVIN	NVKNEELDAM	61	70	4658	29.6516	2	581.772	1161.53	-4.14048	46.49	Myosin regulatory light chain 2, skeletal muscle isoform OS=Bos taurus GN=MYLPF PE=2 SV=1
Q0P571|MLRS_BOVIN	KVLDPEGK	105	112	347	12.9496	2	443.255	884.496	-0.58324	47.05	Myosin regulatory light chain 2, skeletal muscle isoform OS=Bos taurus GN=MYLPF PE=2 SV=1
Q0P571|MLRS_BOVIN	DRFSQEEI	129	136	1893	30.8915	2	512.242	1022.47	1.8918	44.06	Myosin regulatory light chain 2, skeletal muscle isoform OS=Bos taurus GN=MYLPF PE=2 SV=1
Q0P571|MLRS_BOVIN	FSQEEIK	131	137	94	21.4403	2	440.724	879.434	-0.247501	55.34	Myosin regulatory light chain 2, skeletal muscle isoform OS=Bos taurus GN=MYLPF PE=2 SV=1
Q0P571|MLRS_BOVIN	FSQEEIKN	131	138	4237	20.2407	2	497.745	993.476	-0.811797	43.94	Myosin regulatory light chain 2, skeletal muscle isoform OS=Bos taurus GN=MYLPF PE=2 SV=1
Q0P571|MLRS_BOVIN	SQEEIKNM	132	139	2053	19.4951	2	489.731	977.448	-0.924071	47.31	Myosin regulatory light chain 2, skeletal muscle isoform OS=Bos taurus GN=MYLPF PE=2 SV=1
Q0P571|MLRS_BOVIN	VITHGDAK	159	166	213	4.15178	2	420.732	839.449	-0.765209	45.17	Myosin regulatory light chain 2, skeletal muscle isoform OS=Bos taurus GN=MYLPF PE=2 SV=1
Q0P571|MLRS_BOVIN	VITHGDAKDQE	159	169	1305	8.8269	2	606.796	1211.58	-1.03792	54.39	Myosin regulatory light chain 2, skeletal muscle isoform OS=Bos taurus GN=MYLPF PE=2 SV=1
Tropomyosin alpha-1 chain OS=Bos taurus GN=TPM1 PE=2 SV=1
Accession	peptide sequence	Start_pos	end_pos	progenesis peptide number	Retention time (min)	Charge	m/z	Measured mass	Mass error (ppm)	Score	Description
Q5KR49|TPM1_BOVIN	LKATEDELD	49	57	441	23.5842	2	517.256	1032.5	-0.728809	56.01	Tropomyosin alpha-1 chain OS=Bos taurus GN=TPM1 PE=2 SV=1
Q5KR49|TPM1_BOVIN	LKATEDELDK	49	58	2021	19.6436	2	581.302	1160.59	-1.78301	55.51	Tropomyosin alpha-1 chain OS=Bos taurus GN=TPM1 PE=2 SV=1
Q5KR49|TPM1_BOVIN	ATEDELDK	51	58	2479	12.2107	2	460.714	919.413	-0.491472	50.34	Tropomyosin alpha-1 chain OS=Bos taurus GN=TPM1 PE=2 SV=1
Q5KR49|TPM1_BOVIN	AQKDEEKMEIQ	133	143	5635	18.7584	2	674.824	1347.63	-0.814351	55.82	Tropomyosin alpha-1 chain OS=Bos taurus GN=TPM1 PE=2 SV=1
Q5KR49|TPM1_BOVIN	HIAEDADR	152	159	1002	6.84105	2	463.719	925.424	-1.00121	45.67	Tropomyosin alpha-1 chain OS=Bos taurus GN=TPM1 PE=2 SV=1
Actin, alpha skeletal muscle OS=Bos taurus GN=ACTA1 PE=1 SV=1
Accession	peptide sequence	Start_pos	end_pos	progenesis peptide number	Retention time (min)	Charge	m/z	Measured mass	Mass error (ppm)	Score	Description
P68138|ACTS_BOVIN	VCDNGSGLV	10	18	384	29.5095	2	432.2	862.386	0.7727	45.39	Actin, alpha skeletal muscle OS=Bos taurus GN=ACTA1 PE=1 SV=1
P68138|ACTS_BOVIN	VCDNGSGLVK	10	19	512	21.141	2	496.248	990.481	0.658233	74.67	Actin, alpha skeletal muscle OS=Bos taurus GN=ACTA1 PE=1 SV=1
P68138|ACTS_BOVIN	VCDNGSGLVKA	10	20	1086	26.3224	2	531.766	1061.52	-0.934754	82.6	Actin, alpha skeletal muscle OS=Bos taurus GN=ACTA1 PE=1 SV=1
P68138|ACTS_BOVIN	VKAGFAGDDAPR	18	29	1227	22.0257	3	401.875	1202.6	-0.461995	51.36	Actin, alpha skeletal muscle OS=Bos taurus GN=ACTA1 PE=1 SV=1
P68138|ACTS_BOVIN	AGFAGDDAPR	20	29	1	21.4403	2	488.728	975.441	-0.399827	72.96	Actin, alpha skeletal muscle OS=Bos taurus GN=ACTA1 PE=1 SV=1
P68138|ACTS_BOVIN	GFAGDDAPR	21	29	144	19.4951	2	453.208	904.401	-2.94439	51.7	Actin, alpha skeletal muscle OS=Bos taurus GN=ACTA1 PE=1 SV=1
P68138|ACTS_BOVIN	FAGDDAPR	22	29	472	16.1174	2	424.698	847.382	-0.2181	54.95	Actin, alpha skeletal muscle OS=Bos taurus GN=ACTA1 PE=1 SV=1
P68138|ACTS_BOVIN	AGDDAPR	23	29	235	4.01648	2	351.164	700.314	0.241872	64.27	Actin, alpha skeletal muscle OS=Bos taurus GN=ACTA1 PE=1 SV=1
P68138|ACTS_BOVIN	PSIVGRPR	33	40	120	17.138	2	441.269	880.523	-1.60464	50.03	Actin, alpha skeletal muscle OS=Bos taurus GN=ACTA1 PE=1 SV=1
P68138|ACTS_BOVIN	HQGVMVGMGQ	41	50	62	28.3291	2	522.242	1042.47	0.0234677	58.35	Actin, alpha skeletal muscle OS=Bos taurus GN=ACTA1 PE=1 SV=1
P68138|ACTS_BOVIN	HQGVMVGMGQK	41	51	117	22.6202	2	586.289	1170.56	-0.4535	74.75	Actin, alpha skeletal muscle OS=Bos taurus GN=ACTA1 PE=1 SV=1
P68138|ACTS_BOVIN	HQGVMVGMGQKDS	41	53	4228	23.4344	2	687.315	1372.61	-5.9063	58.81	Actin, alpha skeletal muscle OS=Bos taurus GN=ACTA1 PE=1 SV=1
P68138|ACTS_BOVIN	HQGVMVGMGQKDSYVGDEAQSKR	41	63	4756	31.1108	4	627.549	2506.17	-0.689121	55.86	Actin, alpha skeletal muscle OS=Bos taurus GN=ACTA1 PE=1 SV=1
P68138|ACTS_BOVIN	VGMGQKDS	46	53	7313	8.08945	2	411.195	820.376	1.21019	55.42	Actin, alpha skeletal muscle OS=Bos taurus GN=ACTA1 PE=1 SV=1
P68138|ACTS_BOVIN	VGMGQKDSYVGDEAQS	46	61	8071	28.0282	2	835.869	1669.72	-1.31516	62.92	Actin, alpha skeletal muscle OS=Bos taurus GN=ACTA1 PE=1 SV=1
P68138|ACTS_BOVIN	VGMGQKDSYVGDEAQSK	46	62	3011	25.2824	3	600.281	1797.82	-0.0841474	51.79	Actin, alpha skeletal muscle OS=Bos taurus GN=ACTA1 PE=1 SV=1
P68138|ACTS_BOVIN	MGQKDSYVGDEAQSK	48	62	7609	18.8332	3	548.251	1641.73	0.273089	41.95	Actin, alpha skeletal muscle OS=Bos taurus GN=ACTA1 PE=1 SV=1
P68138|ACTS_BOVIN	DSYVGDEAQS	52	61	731	19.5672	2	535.717	1069.42	-0.947267	73.18	Actin, alpha skeletal muscle OS=Bos taurus GN=ACTA1 PE=1 SV=1
P68138|ACTS_BOVIN	DSYVGDEAQSK	52	62	42	16.637	2	599.764	1197.51	-0.787544	71.15	Actin, alpha skeletal muscle OS=Bos taurus GN=ACTA1 PE=1 SV=1
P68138|ACTS_BOVIN	DSYVGDEAQSKR	52	63	4802	16.1174	2	677.815	1353.61	-1.09931	82.32	Actin, alpha skeletal muscle OS=Bos taurus GN=ACTA1 PE=1 SV=1
P68138|ACTS_BOVIN	VGDEAQSK	55	62	2181	3.58503	2	417.204	832.394	1.86497	59.31	Actin, alpha skeletal muscle OS=Bos taurus GN=ACTA1 PE=1 SV=1
P68138|ACTS_BOVIN	VAPEEHPTL	97	105	147	28.9301	2	496.756	991.497	-0.775729	43.73	Actin, alpha skeletal muscle OS=Bos taurus GN=ACTA1 PE=1 SV=1
P68138|ACTS_BOVIN	LTEAPLNPK	106	114	6	26.0253	2	491.781	981.548	-1.56883	49.81	Actin, alpha skeletal muscle OS=Bos taurus GN=ACTA1 PE=1 SV=1
P68138|ACTS_BOVIN	TEAPLNPK	107	114	3	17.0656	2	435.24	868.465	-0.306117	51.24	Actin, alpha skeletal muscle OS=Bos taurus GN=ACTA1 PE=1 SV=1
P68138|ACTS_BOVIN	EKMTQIM	118	124	49	30.227	2	440.717	879.42	0.247484	41.64	Actin, alpha skeletal muscle OS=Bos taurus GN=ACTA1 PE=1 SV=1
P68138|ACTS_BOVIN	IVLDSGDGVTH	152	162	318	29.0738	2	556.782	1111.55	-0.559986	75.77	Actin, alpha skeletal muscle OS=Bos taurus GN=ACTA1 PE=1 SV=1
P68138|ACTS_BOVIN	VLDSGDGVTH	153	162	391	17.8023	2	500.24	998.466	-0.798153	72.16	Actin, alpha skeletal muscle OS=Bos taurus GN=ACTA1 PE=1 SV=1
P68138|ACTS_BOVIN	LDSGDGVTH	154	162	943	11.2718	2	450.706	899.398	-0.840458	62.99	Actin, alpha skeletal muscle OS=Bos taurus GN=ACTA1 PE=1 SV=1
P68138|ACTS_BOVIN	DSGDGVTH	155	162	566	3.72857	2	394.164	786.314	-0.615787	61.69	Actin, alpha skeletal muscle OS=Bos taurus GN=ACTA1 PE=1 SV=1
P68138|ACTS_BOVIN	RLDLAGR	178	184	3231	19.2032	2	400.74	799.466	-0.500315	46.53	Actin, alpha skeletal muscle OS=Bos taurus GN=ACTA1 PE=1 SV=1
P68138|ACTS_BOVIN	DLAGRDLTD	180	188	1679	25.8054	2	488.24	974.466	-0.997239	60.17	Actin, alpha skeletal muscle OS=Bos taurus GN=ACTA1 PE=1 SV=1
P68138|ACTS_BOVIN	MATAASSSSLEKS	228	240	7333	20.8366	2	635.303	1268.59	0.0893513	83.46	Actin, alpha skeletal muscle OS=Bos taurus GN=ACTA1 PE=1 SV=1
P68138|ACTS_BOVIN	AASSSSLEK	231	239	3737	7.64	2	440.224	878.434	-0.850954	59.82	Actin, alpha skeletal muscle OS=Bos taurus GN=ACTA1 PE=1 SV=1
P68138|ACTS_BOVIN	ASSSSLEK	232	239	3625	6.17057	2	404.706	807.397	0.0489625	45.97	Actin, alpha skeletal muscle OS=Bos taurus GN=ACTA1 PE=1 SV=1
P68138|ACTS_BOVIN	SSSLEK	234	239	1782	3.94845	2	325.671	649.328	-0.583925	43.12	Actin, alpha skeletal muscle OS=Bos taurus GN=ACTA1 PE=1 SV=1
P68138|ACTS_BOVIN	EKSYELPDGQ	238	247	1417	28.178	2	583.272	1164.53	-0.73985	48.42	Actin, alpha skeletal muscle OS=Bos taurus GN=ACTA1 PE=1 SV=1
P68138|ACTS_BOVIN	VITIGNE	248	254	3017	30.1569	2	373.208	744.402	0.716818	49.34	Actin, alpha skeletal muscle OS=Bos taurus GN=ACTA1 PE=1 SV=1
P68138|ACTS_BOVIN	GMESAGIHET	269	278	1623	21.0646	2	516.226	1030.44	-0.525389	63.48	Actin, alpha skeletal muscle OS=Bos taurus GN=ACTA1 PE=1 SV=1
P68138|ACTS_BOVIN	GMESAGIHETT	269	279	359	22.9882	2	566.751	1131.49	0.715247	66.98	Actin, alpha skeletal muscle OS=Bos taurus GN=ACTA1 PE=1 SV=1
P68138|ACTS_BOVIN	GMESAGIHETTYN	269	281	3086	28.6309	2	705.304	1408.59	0.674187	66.58	Actin, alpha skeletal muscle OS=Bos taurus GN=ACTA1 PE=1 SV=1
P68138|ACTS_BOVIN	MESAGIHETTYN	270	281	10046	26.3976	2	676.791	1351.57	-2.81553	57.1	Actin, alpha skeletal muscle OS=Bos taurus GN=ACTA1 PE=1 SV=1
P68138|ACTS_BOVIN	SAGIHETT	272	279	1577	10.6173	2	408.198	814.381	-1.23141	44.31	Actin, alpha skeletal muscle OS=Bos taurus GN=ACTA1 PE=1 SV=1
P68138|ACTS_BOVIN	ANNVMSGGTTM	296	306	2403	29.7222	2	541.734	1081.45	-0.5643	74.51	Actin, alpha skeletal muscle OS=Bos taurus GN=ACTA1 PE=1 SV=1
P68138|ACTS_BOVIN	KIIAPPE	329	335	1740	26.0253	2	384.236	766.458	-1.4221	60.22	Actin, alpha skeletal muscle OS=Bos taurus GN=ACTA1 PE=1 SV=1
P68138|ACTS_BOVIN	IIAPPERK	330	337	398	18.2425	3	308.527	922.559	-0.575079	41.19	Actin, alpha skeletal muscle OS=Bos taurus GN=ACTA1 PE=1 SV=1
P68138|ACTS_BOVIN	EYDEAGPSIVH	362	372	34	30.8915	2	608.777	1215.54	-0.942998	51.63	Actin, alpha skeletal muscle OS=Bos taurus GN=ACTA1 PE=1 SV=1
P68138|ACTS_BOVIN	YDEAGPSIVH	363	372	2957	29.0033	2	544.256	1086.5	0.0384262	52.89	Actin, alpha skeletal muscle OS=Bos taurus GN=ACTA1 PE=1 SV=1
P68138|ACTS_BOVIN	DEAGPSIVH	364	372	72	22.6202	2	462.724	923.434	-0.922583	49.25	Actin, alpha skeletal muscle OS=Bos taurus GN=ACTA1 PE=1 SV=1
Elongation factor 1-alpha 2 OS=Bos taurus GN=EEF1A2 PE=2 SV=1
Accession	peptide sequence	Start_pos	end_pos	progenesis peptide number	Retention time (min)	Charge	m/z	Measured mass	Mass error (ppm)	Score	Description
Q32PH8|EF1A2_BOVIN	VETGILRPG	266	274	3795	30.4478	2	471.273	940.531	-3.11291	55.41	Elongation factor 1-alpha 2 OS=Bos taurus GN=EEF1A2 PE=2 SV=1
Q32PH8|EF1A2_BOVIN	KLEDNPK	385	391	2949	5.49687	2	422.233	842.451	1.7774	49.12	Elongation factor 1-alpha 2 OS=Bos taurus GN=EEF1A2 PE=2 SV=1
Calsequestrin OS=Bos taurus GN=casq1 PE=2 SV=1
Accession	peptide sequence	Start_pos	end_pos	progenesis peptide number	Retention time (min)	Charge	m/z	Measured mass	Mass error (ppm)	Score	Description
Q05JF3|Q05JF3_BOVIN	GMVDSEKDAAVA	106	117	435	25.3572	2	596.779	1191.54	-0.685269	50.52	Calsequestrin OS=Bos taurus GN=casq1 PE=2 SV=1
Q05JF3|Q05JF3_BOVIN	KLGLTEED	119	126	2854	25.0615	2	452.735	903.456	1.37017	56.71	Calsequestrin OS=Bos taurus GN=casq1 PE=2 SV=1
Myosin-1 OS=Bos taurus GN=MYH1 PE=2 SV=2
Accession	peptide sequence	Start_pos	end_pos	progenesis peptide number	Retention time (min)	Charge	m/z	Measured mass	Mass error (ppm)	Score	Description
Q9BE40|MYH1_BOVIN	VFVADPK	37	43	2314	22.9148	2	388.221	774.427	-0.527603	41.18	Myosin-1 OS=Bos taurus GN=MYH1 PE=2 SV=2
Q9BE40|MYH1_BOVIN	VADPKESFV	39	47	548	31.0385	2	496.257	990.499	-3.05326	48.93	Myosin-1 OS=Bos taurus GN=MYH1 PE=2 SV=2
Q9BE40|MYH1_BOVIN	EGGKVTAK	55	62	2431	2.74025	2	395.226	788.437	-2.57923	44	Myosin-1 OS=Bos taurus GN=MYH1 PE=2 SV=2
Q9BE40|MYH1_BOVIN	TEAGATVTVK	63	72	11891	17.0656	2	488.769	975.523	-1.19297	52.05	Myosin-1 OS=Bos taurus GN=MYH1 PE=2 SV=2
Q9BE40|MYH1_BOVIN	KKEEPTSGK	205	213	3255	1.97163	2	502.273	1002.53	-3.27485	47.06	Myosin-1 OS=Bos taurus GN=MYH1 PE=2 SV=2
Q9BE40|MYH1_BOVIN	VGNEFVTK	408	415	4287	22.1003	2	447.24	892.466	0.407231	54.09	Myosin-1 OS=Bos taurus GN=MYH1 PE=2 SV=2
Q9BE40|MYH1_BOVIN	LFSGPASGEAEGGPK	622	636	2196	31.1108	2	702.347	1402.68	4.57816	87.04	Myosin-1 OS=Bos taurus GN=MYH1 PE=2 SV=2
Q9BE40|MYH1_BOVIN	FSGPASGEAEGGPK	623	636	1067	23.1335	2	645.801	1289.59	-1.66137	95.3	Myosin-1 OS=Bos taurus GN=MYH1 PE=2 SV=2
Q9BE40|MYH1_BOVIN	ARLQTESGEFS	1280	1290	604	27.0609	2	612.795	1223.58	-2.4655	59.62	Myosin-1 OS=Bos taurus GN=MYH1 PE=2 SV=2
Q9BE40|MYH1_BOVIN	REQYEEEQEGK	1346	1356	638	11.048	2	712.817	1423.62	-1.33223	67.53	Myosin-1 OS=Bos taurus GN=MYH1 PE=2 SV=2
Q9BE40|MYH1_BOVIN	REQYEEEQEGKAE	1346	1358	8960	14.3581	2	812.856	1623.7	-1.72176	51.08	Myosin-1 OS=Bos taurus GN=MYH1 PE=2 SV=2
Q9BE40|MYH1_BOVIN	REQYEEEQEGKAELQ	1346	1360	2111	24.6928	3	622.621	1864.84	-1.07819	70.55	Myosin-1 OS=Bos taurus GN=MYH1 PE=2 SV=2
Q9BE40|MYH1_BOVIN	EQYEEEQEGK	1347	1356	8428	12.1353	2	634.767	1267.52	-0.973651	45.04	Myosin-1 OS=Bos taurus GN=MYH1 PE=2 SV=2
Q9BE40|MYH1_BOVIN	EQYEEEQEGKAELQ	1347	1360	7063	27.0609	2	855.378	1708.74	-0.186196	88.94	Myosin-1 OS=Bos taurus GN=MYH1 PE=2 SV=2
Q9BE40|MYH1_BOVIN	YEEEQEGKAELQ	1349	1360	5758	23.5842	2	726.827	1451.64	-1.04612	76.66	Myosin-1 OS=Bos taurus GN=MYH1 PE=2 SV=2
Q9BE40|MYH1_BOVIN	LQDAEEH	1399	1405	315	6.98935	2	421.188	840.361	-0.460825	44.58	Myosin-1 OS=Bos taurus GN=MYH1 PE=2 SV=2
Q9BE40|MYH1_BOVIN	LQDAEEHVEA	1399	1408	5213	22.1739	2	570.762	1139.51	0.619238	42.88	Myosin-1 OS=Bos taurus GN=MYH1 PE=2 SV=2
Q9BE40|MYH1_BOVIN	IKNAYEESLDQ	1486	1496	4584	29.1476	2	655.317	1308.62	-0.338888	50.22	Myosin-1 OS=Bos taurus GN=MYH1 PE=2 SV=2
Q9BE40|MYH1_BOVIN	STQAILK	1647	1653	2817	17.5813	2	380.731	759.448	-0.857398	41.04	Myosin-1 OS=Bos taurus GN=MYH1 PE=2 SV=2
Q9BE40|MYH1_BOVIN	QAEEAEEQSNVNLS	1883	1896	7797	27.4297	2	774.344	1546.67	-1.36251	81.32	Myosin-1 OS=Bos taurus GN=MYH1 PE=2 SV=2
CALR protein OS=Bos taurus GN=CALR PE=2 SV=1
Accession	peptide sequence	Start_pos	end_pos	progenesis peptide number	Retention time (min)	Charge	m/z	Measured mass	Mass error (ppm)	Score	Description
A5D7J6|A5D7J6_BOVIN	IDDPTDSKPE	224	233	7303	17.6537	2	558.756	1115.5	-0.597169	61.57	CALR protein OS=Bos taurus GN=CALR PE=2 SV=1
A5D7J6|A5D7J6_BOVIN	IDDPTDSKPED	224	234	10482	19.2771	2	616.269	1230.52	-0.928424	64.27	CALR protein OS=Bos taurus GN=CALR PE=2 SV=1
Myosin-2 OS=Bos taurus GN=MYH2 PE=2 SV=1
Accession	peptide sequence	Start_pos	end_pos	progenesis peptide number	Retention time (min)	Charge	m/z	Measured mass	Mass error (ppm)	Score	Description
F1MRC2|F1MRC2_BOVIN	ESFVKGTIQS	44	53	851	29.7946	2	548.288	1094.56	0.00958878	46.24	Myosin-2 OS=Bos taurus GN=MYH2 PE=2 SV=1
F1MRC2|F1MRC2_BOVIN	KKEEITSGK	205	213	1870	3.58503	2	510.29	1018.56	-1.15507	54.36	Myosin-2 OS=Bos taurus GN=MYH2 PE=2 SV=1
F1MRC2|F1MRC2_BOVIN	IQGTLEDQ	214	221	3040	20.6871	2	452.225	902.435	0.0767409	45.06	Myosin-2 OS=Bos taurus GN=MYH2 PE=2 SV=1
F1MRC2|F1MRC2_BOVIN	LFSGTPTGDSEASGGTK	622	638	2752	28.3291	2	806.378	1610.74	-0.779272	91.73	Myosin-2 OS=Bos taurus GN=MYH2 PE=2 SV=1
F1MRC2|F1MRC2_BOVIN	FSGTPTGDSEASGGT	623	637	5268	23.6601	2	685.788	1369.56	-1.02306	49.83	Myosin-2 OS=Bos taurus GN=MYH2 PE=2 SV=1
F1MRC2|F1MRC2_BOVIN	FSGTPTGDSEASGGTK	623	638	2112	20.0156	2	749.837	1497.66	1.19563	78.61	Myosin-2 OS=Bos taurus GN=MYH2 PE=2 SV=1
F1MRC2|F1MRC2_BOVIN	SGTPTGDSEASGGT	624	637	8832	12.7266	2	612.254	1222.49	-0.918925	43.06	Myosin-2 OS=Bos taurus GN=MYH2 PE=2 SV=1
F1MRC2|F1MRC2_BOVIN	SGTPTGDSEASGGTK	624	638	3103	9.79668	2	676.304	1350.59	2.80946	73.49	Myosin-2 OS=Bos taurus GN=MYH2 PE=2 SV=1
F1MRC2|F1MRC2_BOVIN	LINDLTTQRG	1273	1282	487	29.8684	2	565.812	1129.61	0.166508	48.88	Myosin-2 OS=Bos taurus GN=MYH2 PE=2 SV=1
F1MRC2|F1MRC2_BOVIN	GRLQTESGEFS	1282	1292	346	26.5486	2	605.788	1209.56	-1.3301	45.4	Myosin-2 OS=Bos taurus GN=MYH2 PE=2 SV=1
F1MRC2|F1MRC2_BOVIN	NALAHGLQSA	1331	1340	917	27.1356	2	491.259	980.503	-0.681828	51.86	Myosin-2 OS=Bos taurus GN=MYH2 PE=2 SV=1
F1MRC2|F1MRC2_BOVIN	REQYEEEQESK	1348	1358	819	10.8208	2	727.822	1453.63	-1.28366	76.37	Myosin-2 OS=Bos taurus GN=MYH2 PE=2 SV=1
F1MRC2|F1MRC2_BOVIN	REQYEEEQESKAELQ	1348	1362	2617	24.325	3	632.625	1894.85	-1.14396	74.33	Myosin-2 OS=Bos taurus GN=MYH2 PE=2 SV=1
F1MRC2|F1MRC2_BOVIN	YEEEQESKAELQ	1351	1362	8547	23.2066	2	741.833	1481.65	-0.391575	83.37	Myosin-2 OS=Bos taurus GN=MYH2 PE=2 SV=1
F1MRC2|F1MRC2_BOVIN	LQAAEEHVE	1401	1409	4968	19.4225	2	513.249	1024.48	1.6905	42.34	Myosin-2 OS=Bos taurus GN=MYH2 PE=2 SV=1
F1MRC2|F1MRC2_BOVIN	LQAAEEHVEA	1401	1410	1130	23.5842	2	548.767	1095.52	-1.02558	49.29	Myosin-2 OS=Bos taurus GN=MYH2 PE=2 SV=1
F1MRC2|F1MRC2_BOVIN	LQAAEEHVEAV	1401	1411	61	30.1569	2	598.301	1194.59	-0.693679	62.74	Myosin-2 OS=Bos taurus GN=MYH2 PE=2 SV=1
Glyceraldehyde-3-phosphate dehydrogenase OS=Bos taurus GN=GAPDH PE=1 SV=4
Accession	peptide sequence	Start_pos	end_pos	progenesis peptide number	Retention time (min)	Charge	m/z	Measured mass	Mass error (ppm)	Score	Description
P10096|G3P_BOVIN	AAFNSGK	18	24	1474	6.91445	2	347.68	693.345	-0.00198991	56.71	Glyceraldehyde-3-phosphate dehydrogenase OS=Bos taurus GN=GAPDH PE=1 SV=4
P10096|G3P_BOVIN	NSGKVDIVA	21	29	2863	24.2525	2	451.75	901.486	-1.14002	44.18	Glyceraldehyde-3-phosphate dehydrogenase OS=Bos taurus GN=GAPDH PE=1 SV=4
P10096|G3P_BOVIN	MFQYDSTHG	43	51	698	28.5537	2	543.221	1084.43	-0.690748	44.17	Glyceraldehyde-3-phosphate dehydrogenase OS=Bos taurus GN=GAPDH PE=1 SV=4
P10096|G3P_BOVIN	FQYDSTHG	44	51	1150	19.7892	2	477.701	953.387	-1.03217	42.56	Glyceraldehyde-3-phosphate dehydrogenase OS=Bos taurus GN=GAPDH PE=1 SV=4
P10096|G3P_BOVIN	AENGKLVING	59	68	1521	25.4327	2	507.782	1013.55	-1.2123	44.69	Glyceraldehyde-3-phosphate dehydrogenase OS=Bos taurus GN=GAPDH PE=1 SV=4
P10096|G3P_BOVIN	AENGKLVINGK	59	69	2118	19.2032	2	571.829	1141.64	-1.86019	63.31	Glyceraldehyde-3-phosphate dehydrogenase OS=Bos taurus GN=GAPDH PE=1 SV=4
P10096|G3P_BOVIN	KWGDAGAE	83	90	1920	16.4174	2	417.193	832.372	0.792571	63.7	Glyceraldehyde-3-phosphate dehydrogenase OS=Bos taurus GN=GAPDH PE=1 SV=4
P10096|G3P_BOVIN	AGAHLKGGA	105	113	2289	5.6471	2	391.219	780.424	-0.656708	58.37	Glyceraldehyde-3-phosphate dehydrogenase OS=Bos taurus GN=GAPDH PE=1 SV=4
P10096|G3P_BOVIN	GAHLKGGA	106	113	1543	5.6471	2	355.701	709.387	-0.0781079	42.7	Glyceraldehyde-3-phosphate dehydrogenase OS=Bos taurus GN=GAPDH PE=1 SV=4
P10096|G3P_BOVIN	HDHFGIVEG	162	170	2247	29.7222	2	505.736	1009.46	-3.58339	51.91	Glyceraldehyde-3-phosphate dehydrogenase OS=Bos taurus GN=GAPDH PE=1 SV=4
P10096|G3P_BOVIN	TVDGPSGKL	184	192	124	22.7693	2	437.238	872.462	1.64504	52.31	Glyceraldehyde-3-phosphate dehydrogenase OS=Bos taurus GN=GAPDH PE=1 SV=4
P10096|G3P_BOVIN	KYDEIK	251	256	2584	10.3961	2	398.214	794.414	-4.60378	42.07	Glyceraldehyde-3-phosphate dehydrogenase OS=Bos taurus GN=GAPDH PE=1 SV=4
P10096|G3P_BOVIN	DFNSDTHSST	282	291	1378	13.3197	2	555.72	1109.42	-1.14446	65.81	Glyceraldehyde-3-phosphate dehydrogenase OS=Bos taurus GN=GAPDH PE=1 SV=4
P10096|G3P_BOVIN	DFNSDTHSSTF	282	292	2923	31.0385	2	629.254	1256.49	-0.966447	46.93	Glyceraldehyde-3-phosphate dehydrogenase OS=Bos taurus GN=GAPDH PE=1 SV=4
P10096|G3P_BOVIN	ALNDHF	299	304	528	26.9886	2	358.672	715.329	0.752706	42.81	Glyceraldehyde-3-phosphate dehydrogenase OS=Bos taurus GN=GAPDH PE=1 SV=4
P10096|G3P_BOVIN	MVHMASKE	325	332	4263	13.1733	2	466.72	931.425	-0.537503	49.06	Glyceraldehyde-3-phosphate dehydrogenase OS=Bos taurus GN=GAPDH PE=1 SV=4
Sarcoplasmic/endoplasmic reticulum calcium ATPase 1 OS=Bos taurus GN=ATP2A1 PE=1 SV=1
Accession	peptide sequence	Start_pos	end_pos	progenesis peptide number	Retention time (min)	Charge	m/z	Measured mass	Mass error (ppm)	Score	Description
Q0VCY0|AT2A1_BOVIN	KEYEPEMGKV	119	128	726	28.857	2	605.294	1208.57	-1.05912	48.28	Sarcoplasmic/endoplasmic reticulum calcium ATPase 1 OS=Bos taurus GN=ATP2A1 PE=1 SV=1
Q0VCY0|AT2A1_BOVIN	FSGTNIAAGK	208	217	3590	24.1029	2	483.256	964.496	-1.36569	68.56	Sarcoplasmic/endoplasmic reticulum calcium ATPase 1 OS=Bos taurus GN=ATP2A1 PE=1 SV=1
Q0VCY0|AT2A1_BOVIN	SGTNIAAGK	209	217	1934	9.27827	2	409.721	817.427	-3.05537	76.17	Sarcoplasmic/endoplasmic reticulum calcium ATPase 1 OS=Bos taurus GN=ATP2A1 PE=1 SV=1
Q0VCY0|AT2A1_BOVIN	GVGTEIGK	226	233	1717	16.0408	2	380.714	759.413	0.628752	45.32	Sarcoplasmic/endoplasmic reticulum calcium ATPase 1 OS=Bos taurus GN=ATP2A1 PE=1 SV=1
Q0VCY0|AT2A1_BOVIN	VPMTGPVKE	533	541	1898	26.7668	2	479.255	956.495	-5.42039	48.35	Sarcoplasmic/endoplasmic reticulum calcium ATPase 1 OS=Bos taurus GN=ATP2A1 PE=1 SV=1
Q0VCY0|AT2A1_BOVIN	MITGDNKGTAIA	621	632	3621	27.2826	2	596.306	1190.6	0.0320085	47.45	Sarcoplasmic/endoplasmic reticulum calcium ATPase 1 OS=Bos taurus GN=ATP2A1 PE=1 SV=1
Tropomyosin beta chain OS=Bos taurus GN=TPM2 PE=2 SV=1
Accession	peptide sequence	Start_pos	end_pos	progenesis peptide number	Retention time (min)	Charge	m/z	Measured mass	Mass error (ppm)	Score	Description
Q5KR48|TPM2_BOVIN	KLKGTEDEVE	48	57	1924	13.6163	2	574.296	1146.58	0.371546	50.45	Tropomyosin beta chain OS=Bos taurus GN=TPM2 PE=2 SV=1
Q5KR48|TPM2_BOVIN	KLKGTEDEVEK	48	58	8811	11.1242	2	638.342	1274.67	-2.59914	46.73	Tropomyosin beta chain OS=Bos taurus GN=TPM2 PE=2 SV=1
Q5KR48|TPM2_BOVIN	LKGTEDEVE	49	57	357	15.9697	2	510.248	1018.48	-0.0592908	45.82	Tropomyosin beta chain OS=Bos taurus GN=TPM2 PE=2 SV=1
Q5KR48|TPM2_BOVIN	LKGTEDEVEK	49	58	442	12.6541	3	383.2	1146.58	-0.0530522	45.28	Tropomyosin beta chain OS=Bos taurus GN=TPM2 PE=2 SV=1
Q5KR48|TPM2_BOVIN	GTEDEVEK	51	58	7294	8.01302	2	453.706	905.398	0.310294	45.17	Tropomyosin beta chain OS=Bos taurus GN=TPM2 PE=2 SV=1
Q5KR48|TPM2_BOVIN	SESVKDAQEK	60	69	1964	6.31913	2	560.777	1119.54	-1.04388	53.47	Tropomyosin beta chain OS=Bos taurus GN=TPM2 PE=2 SV=1
Q5KR48|TPM2_BOVIN	HIAEDSDR	152	159	701	4.93145	2	471.717	941.42	-0.716228	44.7	Tropomyosin beta chain OS=Bos taurus GN=TPM2 PE=2 SV=1
Q5KR48|TPM2_BOVIN	SEERAEVAES	178	187	4157	11.8402	2	553.751	1105.49	-1.07928	59.03	Tropomyosin beta chain OS=Bos taurus GN=TPM2 PE=2 SV=1
Q5KR48|TPM2_BOVIN	SLEAQADKY	205	213	2715	26.62	2	512.752	1023.49	1.59497	78.27	Tropomyosin beta chain OS=Bos taurus GN=TPM2 PE=2 SV=1
Q5KR48|TPM2_BOVIN	AISEELDNA	268	276	1268	30.8915	2	481.227	960.44	0.28949	64.75	Tropomyosin beta chain OS=Bos taurus GN=TPM2 PE=2 SV=1
Alpha-actinin-2 (Fragment) OS=Bos taurus GN=ACTN2 PE=4 SV=1
Accession	peptide sequence	Start_pos	end_pos	progenesis peptide number	Retention time (min)	Charge	m/z	Measured mass	Mass error (ppm)	Score	Description
F1MRD4|F1MRD4_BOVIN	LEVISGER	34	41	3134	26.4734	2	451.75	901.486	-0.857517	46.18	Alpha-actinin-2 (Fragment) OS=Bos taurus GN=ACTN2 PE=4 SV=1
F1MRD4|F1MRD4_BOVIN	HLDIPK	180	185	333	22.6202	2	361.713	721.412	0.117779	50.84	Alpha-actinin-2 (Fragment) OS=Bos taurus GN=ACTN2 PE=4 SV=1
F1MRD4|F1MRD4_BOVIN	DAEDIVNTPKPDER	188	201	3503	29.4369	3	533.593	1597.76	-0.519907	46.74	Alpha-actinin-2 (Fragment) OS=Bos taurus GN=ACTN2 PE=4 SV=1
F1MRD4|F1MRD4_BOVIN	NGLMDHED	728	735	2644	18.3152	2	465.684	929.354	-0.96141	41.64	Alpha-actinin-2 (Fragment) OS=Bos taurus GN=ACTN2 PE=4 SV=1
Phosphoglycerate kinase 1 OS=Bos taurus GN=PGK1 PE=2 SV=3
Accession	peptide sequence	Start_pos	end_pos	progenesis peptide number	Retention time (min)	Charge	m/z	Measured mass	Mass error (ppm)	Score	Description
Q3T0P6|PGK1_BOVIN	VNDAFGTAH	161	169	660	19.8638	2	466.217	930.42	-0.0593892	76	Phosphoglycerate kinase 1 OS=Bos taurus GN=PGK1 PE=2 SV=3
Q3T0P6|PGK1_BOVIN	VGVNLPK	176	182	1357	29.7946	2	363.729	725.444	-0.00708676	47.22	Phosphoglycerate kinase 1 OS=Bos taurus GN=PGK1 PE=2 SV=3
Q3T0P6|PGK1_BOVIN	SNMLDKV	224	230	2170	30.6707	2	403.707	805.4	-0.0173281	44.38	Phosphoglycerate kinase 1 OS=Bos taurus GN=PGK1 PE=2 SV=3
Q3T0P6|PGK1_BOVIN	TADKFDENA	287	295	2333	17.0656	2	505.724	1009.43	-1.07086	45.2	Phosphoglycerate kinase 1 OS=Bos taurus GN=PGK1 PE=2 SV=3
L-lactate dehydrogenase A chain OS=Bos taurus GN=LDHA PE=2 SV=2
Accession	peptide sequence	Start_pos	end_pos	progenesis peptide number	Retention time (min)	Charge	m/z	Measured mass	Mass error (ppm)	Score	Description
P19858|LDHA_BOVIN	KEEHVPQN	13	20	2581	6.09652	2	490.743	979.471	-0.949017	51.53	L-lactate dehydrogenase A chain OS=Bos taurus GN=LDHA PE=2 SV=2
P19858|LDHA_BOVIN	DVMEDKLKGE	51	60	3436	26.0253	2	582.284	1162.55	-1.19475	54.01	L-lactate dehydrogenase A chain OS=Bos taurus GN=LDHA PE=2 SV=2
P19858|LDHA_BOVIN	NRVIGSGC	155	162	10019	15.6061	2	403.203	804.391	-0.0364224	47.28	L-lactate dehydrogenase A chain OS=Bos taurus GN=LDHA PE=2 SV=2
P19858|LDHA_BOVIN	KNLHPELGTDADKEQ	211	225	2406	20.99	3	565.616	1693.82	-1.29537	47.43	L-lactate dehydrogenase A chain OS=Bos taurus GN=LDHA PE=2 SV=2
P19858|LDHA_BOVIN	NLHPELGTDADKEQ	212	225	1208	26.1739	2	783.872	1565.73	-2.07168	62.12	L-lactate dehydrogenase A chain OS=Bos taurus GN=LDHA PE=2 SV=2
P19858|LDHA_BOVIN	VTLTHEEEA	305	313	1677	21.0646	2	514.748	1027.48	-1.21135	42.39	L-lactate dehydrogenase A chain OS=Bos taurus GN=LDHA PE=2 SV=2
Myosin-7 OS=Bos taurus GN=MYH7 PE=2 SV=1
Accession	peptide sequence	Start_pos	end_pos	progenesis peptide number	Retention time (min)	Charge	m/z	Measured mass	Mass error (ppm)	Score	Description
Q9BE39|MYH7_BOVIN	LEAQTRPF	23	30	166	30.3728	2	481.258	960.501	-1.50737	54.31	Myosin-7 OS=Bos taurus GN=MYH7 PE=2 SV=1
Q9BE39|MYH7_BOVIN	EEQAEPDGTEEADKS	369	383	5239	15.3011	2	817.836	1633.66	-1.05821	68.85	Myosin-7 OS=Bos taurus GN=MYH7 PE=2 SV=1
Q9BE39|MYH7_BOVIN	EEQAEPDGTEEADKSA	369	384	9555	18.2425	2	853.355	1704.69	-0.94427	54.11	Myosin-7 OS=Bos taurus GN=MYH7 PE=2 SV=1
Q9BE39|MYH7_BOVIN	AGFDTPIEK	624	632	443	31.1848	2	489.252	976.489	2.09933	49.35	Myosin-7 OS=Bos taurus GN=MYH7 PE=2 SV=1
Q9BE39|MYH7_BOVIN	AEQDNLADAEER	892	903	9012	22.0257	2	680.807	1359.6	7.12673	55.45	Myosin-7 OS=Bos taurus GN=MYH7 PE=2 SV=1
Q9BE39|MYH7_BOVIN	LEEAGGATSVQ	1149	1159	6482	21.3646	2	531.262	1060.51	5.63028	77	Myosin-7 OS=Bos taurus GN=MYH7 PE=2 SV=1
Q9BE39|MYH7_BOVIN	TLEDQMNEH	1250	1258	714	21.5867	2	558.734	1115.45	-0.826147	56.69	Myosin-7 OS=Bos taurus GN=MYH7 PE=2 SV=1
Q9BE39|MYH7_BOVIN	SVNDLTSQ	1268	1275	1546	19.1313	2	432.209	862.404	1.00165	53.95	Myosin-7 OS=Bos taurus GN=MYH7 PE=2 SV=1
Q9BE39|MYH7_BOVIN	AKLQTENGELS	1277	1287	378	21.9526	2	595.306	1188.6	-1.34655	93.18	Myosin-7 OS=Bos taurus GN=MYH7 PE=2 SV=1
Q9BE39|MYH7_BOVIN	LQTENGELS	1279	1287	2252	22.4002	2	495.74	989.466	-0.763571	62.29	Myosin-7 OS=Bos taurus GN=MYH7 PE=2 SV=1
Q9BE39|MYH7_BOVIN	TQQLEDLK	1308	1315	3417	23.9561	2	487.761	973.508	-0.479363	42.73	Myosin-7 OS=Bos taurus GN=MYH7 PE=2 SV=1
Q9BE39|MYH7_BOVIN	REQYEEETEAK	1343	1353	2705	13.6163	2	706.319	1410.62	-1.72334	71.63	Myosin-7 OS=Bos taurus GN=MYH7 PE=2 SV=1
Q9BE39|MYH7_BOVIN	TEQLGSSGK	1512	1520	5792	7.48757	2	453.729	905.444	-1.56336	51.91	Myosin-7 OS=Bos taurus GN=MYH7 PE=2 SV=1
Q9BE39|MYH7_BOVIN	ANDDLKENIA	1662	1671	3002	25.0615	2	551.772	1101.53	-0.300471	62.28	Myosin-7 OS=Bos taurus GN=MYH7 PE=2 SV=1
Q9BE39|MYH7_BOVIN	ELENELEAEQK	1820	1830	1815	30.0871	2	666.317	1330.62	-4.13081	71.05	Myosin-7 OS=Bos taurus GN=MYH7 PE=2 SV=1
Q9BE39|MYH7_BOVIN	QAEEAEEQANTNLS	1880	1893	10774	24.0275	2	767.336	1532.66	-0.715393	48.95	Myosin-7 OS=Bos taurus GN=MYH7 PE=2 SV=1
Hemoglobin subunit beta OS=Bos taurus GN=HBB PE=1 SV=1
Accession	peptide sequence	Start_pos	end_pos	progenesis peptide number	Retention time (min)	Charge	m/z	Measured mass	Mass error (ppm)	Score	Description
P02070|HBB_BOVIN	VKVDEVGGE	16	24	3071	20.5369	2	466.239	930.464	-2.4289	79.92	Hemoglobin subunit beta OS=Bos taurus GN=HBB PE=1 SV=1
P02070|HBB_BOVIN	HLDDLKGT	75	82	1184	15.9697	2	449.734	897.454	-1.669	42.21	Hemoglobin subunit beta OS=Bos taurus GN=HBB PE=1 SV=1
Myoglobin OS=Bos taurus GN=MB PE=1 SV=3
Accession	peptide sequence	Start_pos	end_pos	progenesis peptide number	Retention time (min)	Charge	m/z	Measured mass	Mass error (ppm)	Score	Description
P02192|MYG_BOVIN	WGKVEADVAGH	14	24	1636	28.4026	3	390.196	1167.57	-0.294487	54.6	Myoglobin OS=Bos taurus GN=MB PE=1 SV=3
P02192|MYG_BOVIN	KVEADVAGH	16	24	8226	11.1242	2	463.241	924.467	0.0873895	64.59	Myoglobin OS=Bos taurus GN=MB PE=1 SV=3
P02192|MYG_BOVIN	VEADVAGH	17	24	9	12.3634	2	399.193	796.371	-0.261426	47.79	Myoglobin OS=Bos taurus GN=MB PE=1 SV=3
P02192|MYG_BOVIN	VEADVAGHGQEV	17	28	1093	25.0615	2	605.788	1209.56	-0.837565	61.14	Myoglobin OS=Bos taurus GN=MB PE=1 SV=3
P02192|MYG_BOVIN	LFTGHPET	32	39	76	25.9496	2	451.223	900.432	-2.49231	43.7	Myoglobin OS=Bos taurus GN=MB PE=1 SV=3
P02192|MYG_BOVIN	FTGHPETLE	33	41	954	26.7668	2	515.746	1029.48	0.00314488	53.99	Myoglobin OS=Bos taurus GN=MB PE=1 SV=3
P02192|MYG_BOVIN	TGHPETLEK	34	42	970	10.8952	3	337.842	1010.5	-0.29435	45.82	Myoglobin OS=Bos taurus GN=MB PE=1 SV=3
P02192|MYG_BOVIN	ASEDLK	57	62	524	5.34843	2	331.671	661.328	-0.456785	41.81	Myoglobin OS=Bos taurus GN=MB PE=1 SV=3
P02192|MYG_BOVIN	ASEDLKK	57	63	918	4.15178	2	395.718	789.422	-1.36517	47.97	Myoglobin OS=Bos taurus GN=MB PE=1 SV=3
P02192|MYG_BOVIN	TALGGILKK	70	78	973	31.1108	2	450.797	899.58	-0.565201	55.31	Myoglobin OS=Bos taurus GN=MB PE=1 SV=3
P02192|MYG_BOVIN	LGGILKK	72	78	2487	31.1108	2	364.755	727.496	0.165234	46.28	Myoglobin OS=Bos taurus GN=MB PE=1 SV=3
P02192|MYG_BOVIN	KGHHEAE	79	85	1244	1.18687	2	404.19	806.366	-1.15874	53.27	Myoglobin OS=Bos taurus GN=MB PE=1 SV=3
P02192|MYG_BOVIN	HPSDFGADAQ	119	128	186	17.138	2	522.722	1043.43	-1.21026	56.3	Myoglobin OS=Bos taurus GN=MB PE=1 SV=3
P02192|MYG_BOVIN	GADAQAAMSK	124	133	11911	11.2718	2	475.225	948.435	1.53988	49.51	Myoglobin OS=Bos taurus GN=MB PE=1 SV=3
P02192|MYG_BOVIN	RNDMAAQ	139	145	517	5.42307	2	403.185	804.355	0.523805	45.83	Myoglobin OS=Bos taurus GN=MB PE=1 SV=3
Hemoglobin subunit alpha OS=Bos taurus GN=HBA PE=1 SV=2
Accession	peptide sequence	Start_pos	end_pos	progenesis peptide number	Retention time (min)	Charge	m/z	Measured mass	Mass error (ppm)	Score	Description
P01966|HBA_BOVIN	VLSAADKGNV	1	10	771	21.0646	2	487.27	972.526	1.66844	65.02	Hemoglobin subunit alpha OS=Bos taurus GN=HBA PE=1 SV=2
P01966|HBA_BOVIN	VLSAADKGNVK	1	11	4438	14.3581	2	551.316	1100.62	-1.19011	43.61	Hemoglobin subunit alpha OS=Bos taurus GN=HBA PE=1 SV=2
Glucose-6-phosphate isomerase OS=Bos taurus GN=GPI PE=2 SV=4
Accession	peptide sequence	Start_pos	end_pos	progenesis peptide number	Retention time (min)	Charge	m/z	Measured mass	Mass error (ppm)	Score	Description
Q3ZBD7|G6PI_BOVIN	VSNIDGTHIA	183	192	2116	27.0609	2	513.764	1025.51	-1.31898	57.95	Glucose-6-phosphate isomerase OS=Bos taurus GN=GPI PE=2 SV=4
Q3ZBD7|G6PI_BOVIN	FQQGDMESNGK	351	361	3037	16.5624	2	620.766	1239.52	-1.81556	65.6	Glucose-6-phosphate isomerase OS=Bos taurus GN=GPI PE=2 SV=4
Q3ZBD7|G6PI_BOVIN	YQLIHQGT	391	398	2493	28.0282	2	480.251	958.487	-0.492542	43.54	Glucose-6-phosphate isomerase OS=Bos taurus GN=GPI PE=2 SV=4
Q3ZBD7|G6PI_BOVIN	QLIHQGT	392	398	2608	15.6061	2	398.718	795.422	-2.20843	42.15	Glucose-6-phosphate isomerase OS=Bos taurus GN=GPI PE=2 SV=4
Phosphoglycerate mutase 2 OS=Bos taurus GN=PGAM2 PE=3 SV=2
Accession	peptide sequence	Start_pos	end_pos	progenesis peptide number	Retention time (min)	Charge	m/z	Measured mass	Mass error (ppm)	Score	Description
F1N2F2|F1N2F2_BOVIN	GAQAIKDAK	40	48	6056	6.46663	2	451.258	900.501	-2.19808	51.64	Phosphoglycerate mutase 2 OS=Bos taurus GN=PGAM2 PE=3 SV=2
F1N2F2|F1N2F2_BOVIN	KAMEAVAAQGK	240	250	5369	13.2482	2	552.297	1102.58	-0.617355	69.46	Phosphoglycerate mutase 2 OS=Bos taurus GN=PGAM2 PE=3 SV=2
F1N2F2|F1N2F2_BOVIN	AMEAVAAQGK	241	250	1597	16.1922	2	488.248	974.482	-3.41726	73.2	Phosphoglycerate mutase 2 OS=Bos taurus GN=PGAM2 PE=3 SV=2
Myosin light chain 1/3, skeletal muscle isoform OS=Bos taurus GN=MYL1 PE=2 SV=1
Accession	peptide sequence	Start_pos	end_pos	progenesis peptide number	Retention time (min)	Charge	m/z	Measured mass	Mass error (ppm)	Score	Description
A0JNJ5|MYL1_BOVIN	AAPAPAPAPAPA	13	24	1888	25.9496	2	501.274	1000.53	-0.669844	50.2	Myosin light chain 1/3, skeletal muscle isoform OS=Bos taurus GN=MYL1 PE=2 SV=1
A0JNJ5|MYL1_BOVIN	AAPAPAPAPAPAPA	13	26	4832	29.7222	2	585.32	1168.62	0.473606	47.14	Myosin light chain 1/3, skeletal muscle isoform OS=Bos taurus GN=MYL1 PE=2 SV=1
A0JNJ5|MYL1_BOVIN	PAPAPAPAPPK	21	31	4360	21.6627	2	507.292	1012.57	-0.949165	48.13	Myosin light chain 1/3, skeletal muscle isoform OS=Bos taurus GN=MYL1 PE=2 SV=1
A0JNJ5|MYL1_BOVIN	PAPAPAPPKEEK	23	34	2226	17.138	3	411.227	1230.66	-0.413922	41.01	Myosin light chain 1/3, skeletal muscle isoform OS=Bos taurus GN=MYL1 PE=2 SV=1
A0JNJ5|MYL1_BOVIN	QQQDEFKEA	47	55	2464	18.7584	2	561.757	1121.5	1.14459	46.96	Myosin light chain 1/3, skeletal muscle isoform OS=Bos taurus GN=MYL1 PE=2 SV=1
A0JNJ5|MYL1_BOVIN	ALGTNPTNAEVK	78	89	267	24.5501	2	607.822	1213.63	-0.74466	79.26	Myosin light chain 1/3, skeletal muscle isoform OS=Bos taurus GN=MYL1 PE=2 SV=1
A0JNJ5|MYL1_BOVIN	KVLGNPSNEE	90	99	2313	18.019	2	543.775	1085.53	-0.653108	64.74	Myosin light chain 1/3, skeletal muscle isoform OS=Bos taurus GN=MYL1 PE=2 SV=1
A0JNJ5|MYL1_BOVIN	KVLGNPSNEEM	90	100	4869	18.2425	2	617.294	1232.57	2.61881	51.02	Myosin light chain 1/3, skeletal muscle isoform OS=Bos taurus GN=MYL1 PE=2 SV=1
A0JNJ5|MYL1_BOVIN	KVLGNPSNEEMNA	90	102	109	28.3291	2	701.834	1401.65	-1.27975	45.05	Myosin light chain 1/3, skeletal muscle isoform OS=Bos taurus GN=MYL1 PE=2 SV=1
A0JNJ5|MYL1_BOVIN	KVLGNPSNEEMNAK	90	103	3517	22.7693	2	765.881	1529.75	-1.80865	76.27	Myosin light chain 1/3, skeletal muscle isoform OS=Bos taurus GN=MYL1 PE=2 SV=1
A0JNJ5|MYL1_BOVIN	VLGNPSNEEMNA	91	102	5131	24.8395	2	645.784	1289.55	-1.40172	51.88	Myosin light chain 1/3, skeletal muscle isoform OS=Bos taurus GN=MYL1 PE=2 SV=1
A0JNJ5|MYL1_BOVIN	VLGNPSNEEMNAK	91	103	206	26.2467	2	701.834	1401.65	-1.50812	72.94	Myosin light chain 1/3, skeletal muscle isoform OS=Bos taurus GN=MYL1 PE=2 SV=1
A0JNJ5|MYL1_BOVIN	LGNPSNEEMNAK	92	103	7402	21.0646	2	652.301	1302.59	-0.275463	59.86	Myosin light chain 1/3, skeletal muscle isoform OS=Bos taurus GN=MYL1 PE=2 SV=1
A0JNJ5|MYL1_BOVIN	GNPSNEEMNAK	93	103	5849	12.4352	2	595.759	1189.5	-0.00785327	57.27	Myosin light chain 1/3, skeletal muscle isoform OS=Bos taurus GN=MYL1 PE=2 SV=1
A0JNJ5|MYL1_BOVIN	KIEFE	104	108	461	25.5066	2	333.179	664.343	-0.429737	45.31	Myosin light chain 1/3, skeletal muscle isoform OS=Bos taurus GN=MYL1 PE=2 SV=1
A0JNJ5|MYL1_BOVIN	LQAISNNKDQGT	114	125	8869	17.507	2	644.827	1287.64	-1.53775	54.93	Myosin light chain 1/3, skeletal muscle isoform OS=Bos taurus GN=MYL1 PE=2 SV=1
A0JNJ5|MYL1_BOVIN	AISNNKDQGT	116	125	1119	5.34843	2	524.257	1046.5	-0.0422496	63.29	Myosin light chain 1/3, skeletal muscle isoform OS=Bos taurus GN=MYL1 PE=2 SV=1
A0JNJ5|MYL1_BOVIN	AISNNKDQGTYE	116	127	1325	15.6061	2	670.309	1338.6	-1.93475	75.66	Myosin light chain 1/3, skeletal muscle isoform OS=Bos taurus GN=MYL1 PE=2 SV=1
A0JNJ5|MYL1_BOVIN	AISNNKDQGTYED	116	128	7685	15.826	2	727.822	1453.63	-1.49407	66.14	Myosin light chain 1/3, skeletal muscle isoform OS=Bos taurus GN=MYL1 PE=2 SV=1
A0JNJ5|MYL1_BOVIN	SNNKDQGTYE	118	127	5167	7.26538	2	578.244	1154.47	-9.71289	48.98	Myosin light chain 1/3, skeletal muscle isoform OS=Bos taurus GN=MYL1 PE=2 SV=1
A0JNJ5|MYL1_BOVIN	RVFDKEGNGTVM	134	145	2124	28.4026	2	676.834	1351.65	-1.04429	47.53	Myosin light chain 1/3, skeletal muscle isoform OS=Bos taurus GN=MYL1 PE=2 SV=1
A0JNJ5|MYL1_BOVIN	VFDKEGNGTV	135	144	1255	22.7693	2	533.263	1064.51	-1.92691	68.82	Myosin light chain 1/3, skeletal muscle isoform OS=Bos taurus GN=MYL1 PE=2 SV=1
A0JNJ5|MYL1_BOVIN	VFDKEGNGTVM	135	145	5382	20.6871	2	606.781	1211.55	-1.44045	94.38	Myosin light chain 1/3, skeletal muscle isoform OS=Bos taurus GN=MYL1 PE=2 SV=1
A0JNJ5|MYL1_BOVIN	VFDKEGNGTVMG	135	146	1217	29.2203	2	627.294	1252.57	-1.38324	77.85	Myosin light chain 1/3, skeletal muscle isoform OS=Bos taurus GN=MYL1 PE=2 SV=1
A0JNJ5|MYL1_BOVIN	DKEGNGTVM	137	145	4508	12.6541	2	475.715	949.416	-1.43237	48.6	Myosin light chain 1/3, skeletal muscle isoform OS=Bos taurus GN=MYL1 PE=2 SV=1
A0JNJ5|MYL1_BOVIN	HVLATLGEK	151	159	3696	23.5097	2	484.281	966.548	-2.20356	57.61	Myosin light chain 1/3, skeletal muscle isoform OS=Bos taurus GN=MYL1 PE=2 SV=1
A0JNJ5|MYL1_BOVIN	MKEEEVEA	160	167	143	17.9486	2	482.718	963.421	-0.796335	52.76	Myosin light chain 1/3, skeletal muscle isoform OS=Bos taurus GN=MYL1 PE=2 SV=1
A0JNJ5|MYL1_BOVIN	MAGQEDSNGC	169	178	2262	11.1242	2	506.179	1010.34	-0.41983	43.67	Myosin light chain 1/3, skeletal muscle isoform OS=Bos taurus GN=MYL1 PE=2 SV=1
A0JNJ5|MYL1_BOVIN	MAGQEDSNGCI	169	179	2083	26.4734	2	562.72	1123.43	-0.906783	61.7	Myosin light chain 1/3, skeletal muscle isoform OS=Bos taurus GN=MYL1 PE=2 SV=1
A0JNJ5|MYL1_BOVIN	MAGQEDSNGCIN	169	180	1077	21.0646	2	619.742	1237.47	-1.0363	92.22	Myosin light chain 1/3, skeletal muscle isoform OS=Bos taurus GN=MYL1 PE=2 SV=1

## Sheet: Tab_peptide_jejunum
Phosphorylase OS=Bos taurus GN=PYGM PE=3 SV=2
Accession	peptide sequence	Start_pos	end_pos	progenesis peptide number	Retention time (min)	Charge	m/z	Measured mass	Mass error (ppm)	Score	Description
F1MJ28|F1MJ28_BOVIN	GLAGVENV	17	24	7611	27.7228	2	379.706	757.397	-0.338657	45.03	Phosphorylase OS=Bos taurus GN=PYGM PE=3 SV=2
F1MJ28|F1MJ28_BOVIN	DRNVATPR	42	49	6648	7.44202	2	464.751	927.487	-1.79608	41.64	Phosphorylase OS=Bos taurus GN=PYGM PE=3 SV=2
F1MJ28|F1MJ28_BOVIN	NFDAFPDK	325	332	4992	27.5796	2	477.222	952.429	0.0592365	44.59	Phosphorylase OS=Bos taurus GN=PYGM PE=3 SV=2
F1MJ28|F1MJ28_BOVIN	ILVDQER	352	358	2259	16.6275	2	436.745	871.476	-0.521482	43.86	Phosphorylase OS=Bos taurus GN=PYGM PE=3 SV=2
F1MJ28|F1MJ28_BOVIN	IETLLPR	392	398	713	29.6564	2	421.26	840.506	-0.884669	42.83	Phosphorylase OS=Bos taurus GN=PYGM PE=3 SV=2
F1MJ28|F1MJ28_BOVIN	MSLVEEGAVK	428	437	5383	26.6129	2	531.778	1061.54	-0.487442	57.61	Phosphorylase OS=Bos taurus GN=PYGM PE=3 SV=2
F1MJ28|F1MJ28_BOVIN	KVHINPN	554	560	1540	7.6455	2	411.235	820.455	-0.905285	57.55	Phosphorylase OS=Bos taurus GN=PYGM PE=3 SV=2
F1MJ28|F1MJ28_BOVIN	GDVVNHDPVVGD	627	638	1156	21.1586	2	611.789	1221.56	0.338937	51.26	Phosphorylase OS=Bos taurus GN=PYGM PE=3 SV=2
F1MJ28|F1MJ28_BOVIN	ADLSEQI	660	666	5063	25.1449	2	388.196	774.377	1.93611	40.1	Phosphorylase OS=Bos taurus GN=PYGM PE=3 SV=2
F1MJ28|F1MJ28_BOVIN	MPAPDEKI	834	841	4963	24.0257	2	450.728	899.442	0.144607	40.7	Phosphorylase OS=Bos taurus GN=PYGM PE=3 SV=2
Triosephosphate isomerase OS=Bos taurus GN=TPI1 PE=2 SV=3
Accession	peptide sequence	Start_pos	end_pos	progenesis peptide number	Retention time (min)	Charge	m/z	Measured mass	Mass error (ppm)	Score	Description
Q5E956|TPIS_BOVIN	AKVPADTEVV	31	40	3818	22.4577	2	514.784	1027.55	-0.631002	45.41	Triosephosphate isomerase OS=Bos taurus GN=TPI1 PE=2 SV=3
Q5E956|TPIS_BOVIN	TGEISPGMIK	75	84	3048	26.2792	2	516.773	1031.53	-0.46177	46.6	Triosephosphate isomerase OS=Bos taurus GN=TPI1 PE=2 SV=3
Q5E956|TPIS_BOVIN	HVFGESDELIGQ	100	111	4470	32.8785	2	665.815	1329.62	-3.52007	58.1	Triosephosphate isomerase OS=Bos taurus GN=TPI1 PE=2 SV=3
Q5E956|TPIS_BOVIN	HVFGESDELIGQK	100	112	6240	28.5786	3	486.913	1457.72	1.15822	55.18	Triosephosphate isomerase OS=Bos taurus GN=TPI1 PE=2 SV=3
Q5E956|TPIS_BOVIN	GESDELIGQK	103	112	1728	17.979	2	538.266	1074.52	-2.53336	65.69	Triosephosphate isomerase OS=Bos taurus GN=TPI1 PE=2 SV=3
Q5E956|TPIS_BOVIN	VIADNVKDW	149	157	4348	31.3026	2	530.28	1058.55	5.06255	71.06	Triosephosphate isomerase OS=Bos taurus GN=TPI1 PE=2 SV=3
Q5E956|TPIS_BOVIN	ELASQPDVDG	219	228	2028	19.6735	2	515.738	1029.46	-0.917556	46.13	Triosephosphate isomerase OS=Bos taurus GN=TPI1 PE=2 SV=3
Troponin T fast skeletal muscle type OS=Bos taurus GN=Tnnt3 PE=2 SV=1
Accession	peptide sequence	Start_pos	end_pos	progenesis peptide number	Retention time (min)	Charge	m/z	Measured mass	Mass error (ppm)	Score	Description
Q8MKH7|Q8MKH7_BOVIN	AQEEAPPPPAEVPEVH	12	27	4665	28.7991	2	848.911	1695.81	-1.40751	62.46	Troponin T fast skeletal muscle type OS=Bos taurus GN=Tnnt3 PE=2 SV=1
Q8MKH7|Q8MKH7_BOVIN	EEAPPPPAEVPEVH	14	27	1246	28.1571	2	749.363	1496.71	-2.01905	69.78	Troponin T fast skeletal muscle type OS=Bos taurus GN=Tnnt3 PE=2 SV=1
Q8MKH7|Q8MKH7_BOVIN	EAPPPPAEVPEVH	15	27	2271	26.8846	2	684.842	1367.67	-1.22887	49.56	Troponin T fast skeletal muscle type OS=Bos taurus GN=Tnnt3 PE=2 SV=1
Q8MKH7|Q8MKH7_BOVIN	KVDFDDI	54	60	8417	31.0808	2	426.211	850.408	0.337297	47.82	Troponin T fast skeletal muscle type OS=Bos taurus GN=Tnnt3 PE=2 SV=1
Q8MKH7|Q8MKH7_BOVIN	KVDFDDIQ	54	61	474	26.6129	2	490.24	978.466	0.230912	56.48	Troponin T fast skeletal muscle type OS=Bos taurus GN=Tnnt3 PE=2 SV=1
Q8MKH7|Q8MKH7_BOVIN	KVDFDDIQK	54	62	3129	22.3204	2	554.286	1106.56	-2.95054	63.01	Troponin T fast skeletal muscle type OS=Bos taurus GN=Tnnt3 PE=2 SV=1
Q8MKH7|Q8MKH7_BOVIN	VDFDDIQK	55	62	4825	25.5378	2	490.241	978.467	1.06833	44.12	Troponin T fast skeletal muscle type OS=Bos taurus GN=Tnnt3 PE=2 SV=1
Q8MKH7|Q8MKH7_BOVIN	KAGTAPK	245	251	1135	2.09625	2	336.705	671.395	-1.89391	50.43	Troponin T fast skeletal muscle type OS=Bos taurus GN=Tnnt3 PE=2 SV=1
Fructose-bisphosphate aldolase OS=Bos taurus GN=ALDOA PE=2 SV=1
Accession	peptide sequence	Start_pos	end_pos	progenesis peptide number	Retention time (min)	Charge	m/z	Measured mass	Mass error (ppm)	Score	Description
A6QLL8|A6QLL8_BOVIN	PHQYPALT	1	8	5057	21.2898	2	463.739	925.464	-1.94067	41.81	Fructose-bisphosphate aldolase OS=Bos taurus GN=ALDOA PE=2 SV=1
A6QLL8|A6QLL8_BOVIN	PHQYPALTPE	1	10	624	25.6076	2	576.787	1151.56	-0.573209	54.14	Fructose-bisphosphate aldolase OS=Bos taurus GN=ALDOA PE=2 SV=1
A6QLL8|A6QLL8_BOVIN	PHQYPALTPEQ	1	11	261	25.0782	2	640.816	1279.62	-1.08096	61.04	Fructose-bisphosphate aldolase OS=Bos taurus GN=ALDOA PE=2 SV=1
A6QLL8|A6QLL8_BOVIN	AADESTGSIA	31	40	1700	13.7317	2	461.212	920.409	0.112944	59.72	Fructose-bisphosphate aldolase OS=Bos taurus GN=ALDOA PE=2 SV=1
A6QLL8|A6QLL8_BOVIN	AADESTGSIAK	31	41	4030	10.2582	2	525.26	1048.51	2.61899	65.99	Fructose-bisphosphate aldolase OS=Bos taurus GN=ALDOA PE=2 SV=1
A6QLL8|A6QLL8_BOVIN	LQSIGTENTEEN	43	54	154	19.4761	2	667.806	1333.6	-1.24395	100.29	Fructose-bisphosphate aldolase OS=Bos taurus GN=ALDOA PE=2 SV=1
A6QLL8|A6QLL8_BOVIN	LLTADDRVNPC	62	72	7525	27.3015	2	608.802	1215.59	-1.7907	45.55	Fructose-bisphosphate aldolase OS=Bos taurus GN=ALDOA PE=2 SV=1
A6QLL8|A6QLL8_BOVIN	LTADDRVNPC	63	72	2677	20.012	2	552.264	1102.51	4.47562	64.01	Fructose-bisphosphate aldolase OS=Bos taurus GN=ALDOA PE=2 SV=1
A6QLL8|A6QLL8_BOVIN	TADDRVNPC	64	72	1528	12.7503	2	495.719	989.423	-0.432374	60.74	Fructose-bisphosphate aldolase OS=Bos taurus GN=ALDOA PE=2 SV=1
A6QLL8|A6QLL8_BOVIN	KADDGRPFPQ	86	95	2414	15.1401	2	565.784	1129.55	0.778078	63.16	Fructose-bisphosphate aldolase OS=Bos taurus GN=ALDOA PE=2 SV=1
A6QLL8|A6QLL8_BOVIN	ADDGRPFPQ	87	95	90	18.0471	2	501.735	1001.46	-0.576725	62.59	Fructose-bisphosphate aldolase OS=Bos taurus GN=ALDOA PE=2 SV=1
A6QLL8|A6QLL8_BOVIN	ADDGRPFPQV	87	96	4222	29.3742	2	551.269	1100.52	-1.1692	52.4	Fructose-bisphosphate aldolase OS=Bos taurus GN=ALDOA PE=2 SV=1
A6QLL8|A6QLL8_BOVIN	AKGGVVGI	99	106	5152	20.4051	2	350.721	699.428	0.175324	40.21	Fructose-bisphosphate aldolase OS=Bos taurus GN=ALDOA PE=2 SV=1
A6QLL8|A6QLL8_BOVIN	AGTNGETTTQ	116	125	5826	4.47537	2	490.217	978.42	-5.24081	49.06	Fructose-bisphosphate aldolase OS=Bos taurus GN=ALDOA PE=2 SV=1
A6QLL8|A6QLL8_BOVIN	AGTNGETTTQGLDGL	116	130	9646	31.1584	2	717.838	1433.66	-0.892098	57.66	Fructose-bisphosphate aldolase OS=Bos taurus GN=ALDOA PE=2 SV=1
A6QLL8|A6QLL8_BOVIN	KKDGADFA	138	145	317	8.11897	2	426.216	850.418	-0.138465	43.59	Fructose-bisphosphate aldolase OS=Bos taurus GN=ALDOA PE=2 SV=1
A6QLL8|A6QLL8_BOVIN	IGEHTPS	153	159	458	8.85617	2	370.682	739.35	-0.0428683	40.7	Fructose-bisphosphate aldolase OS=Bos taurus GN=ALDOA PE=2 SV=1
A6QLL8|A6QLL8_BOVIN	IGEHTPSS	153	160	318	9.26092	2	414.198	826.382	-0.140709	48.06	Fructose-bisphosphate aldolase OS=Bos taurus GN=ALDOA PE=2 SV=1
A6QLL8|A6QLL8_BOVIN	VEPEILPDGDHDLK	186	199	1998	30.9445	2	788.895	1575.78	-1.61266	42.18	Fructose-bisphosphate aldolase OS=Bos taurus GN=ALDOA PE=2 SV=1
A6QLL8|A6QLL8_BOVIN	PEILPDGDHDLK	188	199	2632	26.7536	3	450.23	1347.67	0.105205	48.58	Fructose-bisphosphate aldolase OS=Bos taurus GN=ALDOA PE=2 SV=1
A6QLL8|A6QLL8_BOVIN	ILPDGDHDL	190	198	191	26.8206	2	497.745	993.476	-0.659221	43.7	Fructose-bisphosphate aldolase OS=Bos taurus GN=ALDOA PE=2 SV=1
A6QLL8|A6QLL8_BOVIN	LEGTLLKPN	223	231	507	25.2738	2	492.79	983.565	-0.517058	69.32	Fructose-bisphosphate aldolase OS=Bos taurus GN=ALDOA PE=2 SV=1
A6QLL8|A6QLL8_BOVIN	LEGTLLKPNM	223	232	7238	33.4517	2	558.31	1114.61	-0.38028	40.62	Fructose-bisphosphate aldolase OS=Bos taurus GN=ALDOA PE=2 SV=1
A6QLL8|A6QLL8_BOVIN	EGTLLKPN	224	231	248	17.7025	2	436.248	870.481	-0.294591	47.84	Fructose-bisphosphate aldolase OS=Bos taurus GN=ALDOA PE=2 SV=1
A6QLL8|A6QLL8_BOVIN	KYSHEEIA	242	249	2450	11.1365	2	488.74	975.465	-1.4871	49.62	Fructose-bisphosphate aldolase OS=Bos taurus GN=ALDOA PE=2 SV=1
KBTBD10 protein OS=Bos taurus GN=KBTBD10 PE=2 SV=1
Accession	peptide sequence	Start_pos	end_pos	progenesis peptide number	Retention time (min)	Charge	m/z	Measured mass	Mass error (ppm)	Score	Description
A4FV78|A4FV78_BOVIN	VDEENKDQPL	354	363	4439	16.2134	2	593.782	1185.55	-1.129	44.48	KBTBD10 protein OS=Bos taurus GN=KBTBD10 PE=2 SV=1
A4FV78|A4FV78_BOVIN	GLGEIDDKI	391	399	8995	32.1059	2	480.256	958.497	-0.591868	40.02	KBTBD10 protein OS=Bos taurus GN=KBTBD10 PE=2 SV=1
Carbonic anhydrase 3 OS=Bos taurus GN=CA3 PE=2 SV=3
Accession	peptide sequence	Start_pos	end_pos	progenesis peptide number	Retention time (min)	Charge	m/z	Measured mass	Mass error (ppm)	Score	Description
Q3SZX4|CAH3_BOVIN	GENQSPIEL	24	32	1773	32.7337	2	493.743	985.471	-0.342343	47.31	Carbonic anhydrase 3 OS=Bos taurus GN=CA3 PE=2 SV=3
Q3SZX4|CAH3_BOVIN	SSAENEPPVPL	229	239	2174	32.7337	2	570.282	1138.55	-0.268967	48.55	Carbonic anhydrase 3 OS=Bos taurus GN=CA3 PE=2 SV=3
TNNI2 protein (Fragment) OS=Bos taurus GN=TNNI2 PE=2 SV=1
Accession	peptide sequence	Start_pos	end_pos	progenesis peptide number	Retention time (min)	Charge	m/z	Measured mass	Mass error (ppm)	Score	Description
A5PJM2|A5PJM2_BOVIN	IDAAEEEK	89	96	326	8.79302	2	452.716	903.418	-0.444891	55.03	TNNI2 protein (Fragment) OS=Bos taurus GN=TNNI2 PE=2 SV=1
A5PJM2|A5PJM2_BOVIN	IDAAEEEKY	89	97	3651	18.7291	2	534.25	1066.49	3.76031	74.35	TNNI2 protein (Fragment) OS=Bos taurus GN=TNNI2 PE=2 SV=1
A5PJM2|A5PJM2_BOVIN	ELEDMNQ	109	115	1311	16.0114	2	439.682	877.349	-0.108378	45.43	TNNI2 protein (Fragment) OS=Bos taurus GN=TNNI2 PE=2 SV=1
A5PJM2|A5PJM2_BOVIN	ELEDMNQKL	109	117	4436	26.6827	2	560.273	1118.53	3.67586	48.53	TNNI2 protein (Fragment) OS=Bos taurus GN=TNNI2 PE=2 SV=1
Alpha-actinin-3 OS=Bos taurus GN=ACTN3 PE=2 SV=1
Accession	peptide sequence	Start_pos	end_pos	progenesis peptide number	Retention time (min)	Charge	m/z	Measured mass	Mass error (ppm)	Score	Description
Q0III9|ACTN3_BOVIN	GAEEIVDGNL	124	133	3318	33.0929	2	508.748	1015.48	0.12411	50.22	Alpha-actinin-3 OS=Bos taurus GN=ACTN3 PE=2 SV=1
Q0III9|ACTN3_BOVIN	GAEEIVDGNLK	124	134	4539	26.0701	2	572.796	1143.58	-0.50858	72.07	Alpha-actinin-3 OS=Bos taurus GN=ACTN3 PE=2 SV=1
Q0III9|ACTN3_BOVIN	KDDPIGNLNTA	211	221	7522	24.5831	2	579.295	1156.57	1.79804	46.27	Alpha-actinin-3 OS=Bos taurus GN=ACTN3 PE=2 SV=1
Q0III9|ACTN3_BOVIN	LDAEDIVNTPKPDEK	235	249	5483	29.7303	3	561.952	1682.84	-0.706252	40.99	Alpha-actinin-3 OS=Bos taurus GN=ACTN3 PE=2 SV=1
Q0III9|ACTN3_BOVIN	DAEDIVNTPKPDEK	236	249	3985	22.1819	2	785.882	1569.75	-1.34386	76.78	Alpha-actinin-3 OS=Bos taurus GN=ACTN3 PE=2 SV=1
Q0III9|ACTN3_BOVIN	ITLTPQ	606	611	3775	23.5498	2	336.7	671.385	-0.427501	45.68	Alpha-actinin-3 OS=Bos taurus GN=ACTN3 PE=2 SV=1
Beta-enolase OS=Bos taurus GN=ENO3 PE=2 SV=1
Accession	peptide sequence	Start_pos	end_pos	progenesis peptide number	Retention time (min)	Charge	m/z	Measured mass	Mass error (ppm)	Score	Description
Q3ZC09|ENOB_BOVIN	GNPTVEV	15	21	1209	21.1586	2	358.184	714.354	-0.661083	40.48	Beta-enolase OS=Bos taurus GN=ENO3 PE=2 SV=1
Q3ZC09|ENOB_BOVIN	KLSVVDQEKVDK	80	91	1632	16.6947	3	463.265	1386.77	1.3668	56.23	Beta-enolase OS=Bos taurus GN=ENO3 PE=2 SV=1
Q3ZC09|ENOB_BOVIN	MIELDGTEN	93	101	1378	27.7228	2	511.229	1020.44	-0.174643	82.34	Beta-enolase OS=Bos taurus GN=ENO3 PE=2 SV=1
Q3ZC09|ENOB_BOVIN	MIELDGTENK	93	102	183	23.6861	2	575.277	1148.54	1.43003	60.1	Beta-enolase OS=Bos taurus GN=ENO3 PE=2 SV=1
Q3ZC09|ENOB_BOVIN	MIELDGTENKS	93	103	561	23.5498	2	618.792	1235.57	-0.512612	65.68	Beta-enolase OS=Bos taurus GN=ENO3 PE=2 SV=1
Q3ZC09|ENOB_BOVIN	HIADLAGNPE	132	141	3903	20.8173	2	518.756	1035.5	-1.40223	40.19	Beta-enolase OS=Bos taurus GN=ENO3 PE=2 SV=1
Q3ZC09|ENOB_BOVIN	FNVINGGSH	149	157	1285	21.4948	2	472.733	943.451	-0.544253	57.67	Beta-enolase OS=Bos taurus GN=ENO3 PE=2 SV=1
Q3ZC09|ENOB_BOVIN	FNVINGGSHAGN	149	160	735	21.6305	2	593.783	1185.55	-0.761233	55.81	Beta-enolase OS=Bos taurus GN=ENO3 PE=2 SV=1
Q3ZC09|ENOB_BOVIN	FNVINGGSHAGNK	149	161	2196	18.1831	3	438.89	1313.65	-0.23032	56.06	Beta-enolase OS=Bos taurus GN=ENO3 PE=2 SV=1
Q3ZC09|ENOB_BOVIN	NVINGGSHAGN	150	160	1432	9.65945	2	520.249	1038.48	-0.618005	54.86	Beta-enolase OS=Bos taurus GN=ENO3 PE=2 SV=1
Q3ZC09|ENOB_BOVIN	NVINGGSHAGNK	150	161	5597	7.57487	2	584.296	1166.58	-0.656768	62.84	Beta-enolase OS=Bos taurus GN=ENO3 PE=2 SV=1
Q3ZC09|ENOB_BOVIN	VINGGSHAGN	151	160	1989	5.00677	2	463.227	924.439	-2.41348	44.86	Beta-enolase OS=Bos taurus GN=ENO3 PE=2 SV=1
Q3ZC09|ENOB_BOVIN	GKDATNVGDEGGFAPN	200	215	2430	22.7377	2	774.846	1547.68	-5.63069	77.56	Beta-enolase OS=Bos taurus GN=ENO3 PE=2 SV=1
Q3ZC09|ENOB_BOVIN	DATNVGDEGGFAPN	202	215	162	25.7495	2	682.291	1362.57	-0.910093	100.46	Beta-enolase OS=Bos taurus GN=ENO3 PE=2 SV=1
Q3ZC09|ENOB_BOVIN	NVGDEGGFAPN	205	215	1187	23.1406	2	538.735	1075.46	-0.782503	78.29	Beta-enolase OS=Bos taurus GN=ENO3 PE=2 SV=1
Q3ZC09|ENOB_BOVIN	ILENNEAL	216	223	3524	27.5796	2	458.243	914.471	-0.0771495	47.66	Beta-enolase OS=Bos taurus GN=ENO3 PE=2 SV=1
Q3ZC09|ENOB_BOVIN	DLDFKSPDDPA	257	267	1331	29.8754	2	610.277	1218.54	-0.971312	49.31	Beta-enolase OS=Bos taurus GN=ENO3 PE=2 SV=1
Q3ZC09|ENOB_BOVIN	IEDPFDQDD	291	299	8859	33.4517	2	547.22	1092.42	0.130202	47.52	Beta-enolase OS=Bos taurus GN=ENO3 PE=2 SV=1
Q3ZC09|ENOB_BOVIN	QIVGDDLTVTNPK	313	325	2468	29.5814	2	700.373	1398.73	-3.15748	89.39	Beta-enolase OS=Bos taurus GN=ENO3 PE=2 SV=1
Q3ZC09|ENOB_BOVIN	IVGDDLTVTNPK	314	325	209	27.0191	2	636.345	1270.68	-1.3427	96.93	Beta-enolase OS=Bos taurus GN=ENO3 PE=2 SV=1
Q3ZC09|ENOB_BOVIN	GDDLTVTNPK	316	325	114	18.1149	2	530.269	1058.52	-0.657215	78.44	Beta-enolase OS=Bos taurus GN=ENO3 PE=2 SV=1
Q3ZC09|ENOB_BOVIN	NQIGSVTESI	344	353	6258	32.178	2	524.268	1046.52	-1.96699	70.67	Beta-enolase OS=Bos taurus GN=ENO3 PE=2 SV=1
Q3ZC09|ENOB_BOVIN	LAQSNGWGV	358	366	11417	31.6637	2	466.235	930.455	-1.46386	45	Beta-enolase OS=Bos taurus GN=ENO3 PE=2 SV=1
Q3ZC09|ENOB_BOVIN	MRIEEAL	410	416	6221	30.0905	2	431.229	860.443	0.631897	42.73	Beta-enolase OS=Bos taurus GN=ENO3 PE=2 SV=1
Q3ZC09|ENOB_BOVIN	MRIEEALGDK	410	419	11043	24.7289	2	581.3	1160.59	-0.597324	41.86	Beta-enolase OS=Bos taurus GN=ENO3 PE=2 SV=1
Q3ZC09|ENOB_BOVIN	IEEALGDK	412	419	738	14.6717	2	437.729	873.444	-0.474322	56.79	Beta-enolase OS=Bos taurus GN=ENO3 PE=2 SV=1
Q3ZC09|ENOB_BOVIN	IEEALGDKA	412	420	1709	17.7025	2	473.247	944.48	-2.00212	63.31	Beta-enolase OS=Bos taurus GN=ENO3 PE=2 SV=1
Q3ZC09|ENOB_BOVIN	IEEALGDKAV	412	421	3867	23.6861	2	522.782	1043.55	-0.615541	59.18	Beta-enolase OS=Bos taurus GN=ENO3 PE=2 SV=1
Pyruvate kinase OS=Bos taurus GN=PKM2 PE=2 SV=1
Accession	peptide sequence	Start_pos	end_pos	progenesis peptide number	Retention time (min)	Charge	m/z	Measured mass	Mass error (ppm)	Score	Description
A5D984|A5D984_BOVIN	HHSDAGTA	3	10	2576	1.92177	2	398.172	794.33	-0.630174	42.1	Pyruvate kinase OS=Bos taurus GN=PKM2 PE=2 SV=1
A5D984|A5D984_BOVIN	DIDSPPITA	33	41	2134	29.5075	2	464.735	927.455	-0.224612	46.24	Pyruvate kinase OS=Bos taurus GN=PKM2 PE=2 SV=1
A5D984|A5D984_BOVIN	HAETIK	83	88	1734	3.64563	2	349.695	697.376	-0.170912	47.5	Pyruvate kinase OS=Bos taurus GN=PKM2 PE=2 SV=1
A5D984|A5D984_BOVIN	VALDTKGPEI	109	118	4829	30.3814	2	521.792	1041.57	-0.9564	57.17	Pyruvate kinase OS=Bos taurus GN=PKM2 PE=2 SV=1
A5D984|A5D984_BOVIN	GSGTAEVELK	125	134	7895	17.0238	2	495.758	989.501	-1.67653	52.09	Pyruvate kinase OS=Bos taurus GN=PKM2 PE=2 SV=1
A5D984|A5D984_BOVIN	VVDVGSK	166	172	775	8.25057	2	352.203	702.391	-0.407361	42.73	Pyruvate kinase OS=Bos taurus GN=PKM2 PE=2 SV=1
A5D984|A5D984_BOVIN	VVDVGSKI	166	173	5992	22.8069	2	408.745	815.475	-0.737313	50.74	Pyruvate kinase OS=Bos taurus GN=PKM2 PE=2 SV=1
A5D984|A5D984_BOVIN	LVTEVENGGSLGSK	192	205	7070	23.753	2	695.362	1388.71	-4.42578	80.49	Pyruvate kinase OS=Bos taurus GN=PKM2 PE=2 SV=1
A5D984|A5D984_BOVIN	VTEVENGGSLGSK	193	205	618	16.1508	2	638.822	1275.63	-0.76372	95.63	Pyruvate kinase OS=Bos taurus GN=PKM2 PE=2 SV=1
A5D984|A5D984_BOVIN	EVENGGSLGSK	195	205	5112	10.3281	2	538.764	1075.51	-0.820141	40.67	Pyruvate kinase OS=Bos taurus GN=PKM2 PE=2 SV=1
A5D984|A5D984_BOVIN	KGVNLPGAA	206	214	834	21.6305	2	413.743	825.471	0.526623	54.77	Pyruvate kinase OS=Bos taurus GN=PKM2 PE=2 SV=1
A5D984|A5D984_BOVIN	KGVNLPGAAV	206	215	1940	28.2951	2	463.276	924.538	-1.11568	59.62	Pyruvate kinase OS=Bos taurus GN=PKM2 PE=2 SV=1
A5D984|A5D984_BOVIN	GVNLPGAAV	207	215	6906	32.465	2	399.23	796.445	0.881164	47.55	Pyruvate kinase OS=Bos taurus GN=PKM2 PE=2 SV=1
A5D984|A5D984_BOVIN	KASDVH	246	251	10739	1.652	2	328.671	655.328	-1.2948	41.02	Pyruvate kinase OS=Bos taurus GN=PKM2 PE=2 SV=1
A5D984|A5D984_BOVIN	KASDVHEV	246	253	4812	6.77128	2	442.727	883.439	-1.43961	50.32	Pyruvate kinase OS=Bos taurus GN=PKM2 PE=2 SV=1
A5D984|A5D984_BOVIN	RGDLGIEIPAEK	293	304	3008	31.0808	2	649.356	1296.7	-4.59833	61.28	Pyruvate kinase OS=Bos taurus GN=PKM2 PE=2 SV=1
A5D984|A5D984_BOVIN	GIEIPAEKV	297	305	8424	32.1059	2	478.276	954.538	-0.386431	41.58	Pyruvate kinase OS=Bos taurus GN=PKM2 PE=2 SV=1
A5D984|A5D984_BOVIN	AGKPVIC	319	325	3196	15.0109	2	344.197	686.379	0.353225	47.03	Pyruvate kinase OS=Bos taurus GN=PKM2 PE=2 SV=1
A5D984|A5D984_BOVIN	SGETAKGDYPLEA	361	373	7150	24.0963	2	669.313	1336.61	-2.16288	53.35	Pyruvate kinase OS=Bos taurus GN=PKM2 PE=2 SV=1
A5D984|A5D984_BOVIN	SGETAKGDYPLEAV	361	374	2120	31.9602	2	718.846	1435.68	-3.31356	40.29	Pyruvate kinase OS=Bos taurus GN=PKM2 PE=2 SV=1
A5D984|A5D984_BOVIN	GETAKGDYPLEAV	362	374	8289	31.8877	2	675.336	1348.66	4.53259	48.75	Pyruvate kinase OS=Bos taurus GN=PKM2 PE=2 SV=1
A5D984|A5D984_BOVIN	KDPVQEA	474	480	1740	9.45318	2	393.703	785.392	0.287159	46.09	Pyruvate kinase OS=Bos taurus GN=PKM2 PE=2 SV=1
Phosphoglucomutase-1 OS=Bos taurus GN=PGM1 PE=2 SV=1
Accession	peptide sequence	Start_pos	end_pos	progenesis peptide number	Retention time (min)	Charge	m/z	Measured mass	Mass error (ppm)	Score	Description
Q08DP0|PGM1_BOVIN	AYQDQKPGTS	10	19	3979	8.60063	2	547.759	1093.5	-0.892247	55.02	Phosphoglucomutase-1 OS=Bos taurus GN=PGM1 PE=2 SV=1
Q08DP0|PGM1_BOVIN	AYQDQKPGTSGL	10	21	6161	19.9415	2	632.812	1263.61	-0.792472	50.59	Phosphoglucomutase-1 OS=Bos taurus GN=PGM1 PE=2 SV=1
Q08DP0|PGM1_BOVIN	VDLGVLGK	164	171	10412	30.5265	2	400.747	799.48	-0.15254	43.62	Phosphoglucomutase-1 OS=Bos taurus GN=PGM1 PE=2 SV=1
Q08DP0|PGM1_BOVIN	TVEIVDSVEA	184	193	4743	33.1627	2	531.273	1060.53	1.9076	54.36	Phosphoglucomutase-1 OS=Bos taurus GN=PGM1 PE=2 SV=1
Q08DP0|PGM1_BOVIN	EDFGGHHPDPN	254	264	3260	13.7981	2	611.252	1220.49	4.2151	47.57	Phosphoglucomutase-1 OS=Bos taurus GN=PGM1 PE=2 SV=1
Q08DP0|PGM1_BOVIN	GEESFGTGSDHI	374	385	963	25.7495	2	618.262	1234.51	-0.0916318	64.76	Phosphoglucomutase-1 OS=Bos taurus GN=PGM1 PE=2 SV=1
Q08DP0|PGM1_BOVIN	DYEEVEAEGANK	428	439	5665	18.528	2	677.292	1352.57	-3.42954	97.93	Phosphoglucomutase-1 OS=Bos taurus GN=PGM1 PE=2 SV=1
Q08DP0|PGM1_BOVIN	EYSDPVDGSIS	474	484	4489	27.0906	2	584.754	1167.49	-0.20724	47.88	Phosphoglucomutase-1 OS=Bos taurus GN=PGM1 PE=2 SV=1
Q08DP0|PGM1_BOVIN	RLSGTGSAGAT	502	512	2738	8.3202	2	489.257	976.499	5.00906	56.59	Phosphoglucomutase-1 OS=Bos taurus GN=PGM1 PE=2 SV=1
MYBPC1 protein OS=Bos taurus GN=MYBPC1 PE=2 SV=1
Accession	peptide sequence	Start_pos	end_pos	progenesis peptide number	Retention time (min)	Charge	m/z	Measured mass	Mass error (ppm)	Score	Description
A6QP89|A6QP89_BOVIN	LAPAPAPPPEEPN	12	24	3492	25.2738	2	650.327	1298.64	-9.04123	49.56	MYBPC1 protein OS=Bos taurus GN=MYBPC1 PE=2 SV=1
A6QP89|A6QP89_BOVIN	VEKPQGGTV	117	125	2242	12.013	2	457.75	913.486	-0.788426	52.94	MYBPC1 protein OS=Bos taurus GN=MYBPC1 PE=2 SV=1
A6QP89|A6QP89_BOVIN	NGQEIRPST	344	352	2858	12.013	2	501.255	1000.5	2.12402	42.72	MYBPC1 protein OS=Bos taurus GN=MYBPC1 PE=2 SV=1
A6QP89|A6QP89_BOVIN	NGEEIIPGPK	433	442	2532	24.2353	2	527.282	1052.55	-0.448786	63.05	MYBPC1 protein OS=Bos taurus GN=MYBPC1 PE=2 SV=1
A6QP89|A6QP89_BOVIN	LSVDLKP	482	488	5852	30.3071	2	386.234	770.454	0.0868481	41.93	MYBPC1 protein OS=Bos taurus GN=MYBPC1 PE=2 SV=1
A6QP89|A6QP89_BOVIN	SVDLKPL	483	489	3916	29.1621	2	386.234	770.454	-0.231161	45.13	MYBPC1 protein OS=Bos taurus GN=MYBPC1 PE=2 SV=1
A6QP89|A6QP89_BOVIN	IRSENYPDST	629	638	9964	14.8686	2	591.277	1180.54	3.53452	46.96	MYBPC1 protein OS=Bos taurus GN=MYBPC1 PE=2 SV=1
A6QP89|A6QP89_BOVIN	IRSENYPDSTT	629	639	7148	15.3447	2	641.798	1281.58	-1.27057	45.72	MYBPC1 protein OS=Bos taurus GN=MYBPC1 PE=2 SV=1
A6QP89|A6QP89_BOVIN	DGAPIDKN	932	939	5248	7.44202	2	415.207	828.399	1.04362	51.21	MYBPC1 protein OS=Bos taurus GN=MYBPC1 PE=2 SV=1
A6QP89|A6QP89_BOVIN	VIDRPGPPQ	984	992	3592	17.7717	2	489.772	977.529	-0.826447	54.79	MYBPC1 protein OS=Bos taurus GN=MYBPC1 PE=2 SV=1
Serum albumin OS=Bos taurus GN=ALB PE=1 SV=4
Accession	peptide sequence	Start_pos	end_pos	progenesis peptide number	Retention time (min)	Charge	m/z	Measured mass	Mass error (ppm)	Score	Description
P02769|ALBU_BOVIN	KDDSPDLPK	129	137	8464	13.9335	2	507.759	1013.5	0.187742	54.75	Serum albumin OS=Bos taurus GN=ALB PE=1 SV=4
P02769|ALBU_BOVIN	TPDETYVPK	514	522	8640	19.6136	2	525.26	1048.51	-2.55655	42.86	Serum albumin OS=Bos taurus GN=ALB PE=1 SV=4
Myosin regulatory light chain 2, skeletal muscle isoform OS=Bos taurus GN=MYLPF PE=2 SV=1
Accession	peptide sequence	Start_pos	end_pos	progenesis peptide number	Retention time (min)	Charge	m/z	Measured mass	Mass error (ppm)	Score	Description
Q0P571|MLRS_BOVIN	RAAAEGGSSSV	8	18	3366	7.44202	2	496.244	990.473	-0.0656455	63.67	Myosin regulatory light chain 2, skeletal muscle isoform OS=Bos taurus GN=MYLPF PE=2 SV=1
Q0P571|MLRS_BOVIN	SMFDQTQIQ	20	28	1592	31.5173	2	549.251	1096.49	1.86438	73.68	Myosin regulatory light chain 2, skeletal muscle isoform OS=Bos taurus GN=MYLPF PE=2 SV=1
Q0P571|MLRS_BOVIN	TVIDQNRDGIID	35	46	4046	27.8684	2	679.848	1357.68	-2.21803	74.84	Myosin regulatory light chain 2, skeletal muscle isoform OS=Bos taurus GN=MYLPF PE=2 SV=1
Q0P571|MLRS_BOVIN	TVIDQNRDGIIDKE	35	48	3233	24.3717	3	539.281	1614.82	-0.893982	80.12	Myosin regulatory light chain 2, skeletal muscle isoform OS=Bos taurus GN=MYLPF PE=2 SV=1
Q0P571|MLRS_BOVIN	DGIIDK	42	47	455	11.9515	2	330.682	659.349	-0.279226	47.84	Myosin regulatory light chain 2, skeletal muscle isoform OS=Bos taurus GN=MYLPF PE=2 SV=1
Q0P571|MLRS_BOVIN	DGIIDKEDL	42	50	163	29.4402	2	509.258	1016.5	-0.440033	46.87	Myosin regulatory light chain 2, skeletal muscle isoform OS=Bos taurus GN=MYLPF PE=2 SV=1
Q0P571|MLRS_BOVIN	LNVKNEEL	60	67	1577	23.8198	2	479.763	957.512	-0.75744	43.36	Myosin regulatory light chain 2, skeletal muscle isoform OS=Bos taurus GN=MYLPF PE=2 SV=1
Q0P571|MLRS_BOVIN	LNVKNEELD	60	68	6877	21.6949	2	537.278	1072.54	1.25256	41.7	Myosin regulatory light chain 2, skeletal muscle isoform OS=Bos taurus GN=MYLPF PE=2 SV=1
Q0P571|MLRS_BOVIN	LNVKNEELDAM	60	70	1012	30.9445	2	638.317	1274.62	0.78813	61.54	Myosin regulatory light chain 2, skeletal muscle isoform OS=Bos taurus GN=MYLPF PE=2 SV=1
Q0P571|MLRS_BOVIN	KEASGPI	72	78	4469	10.1944	2	351.193	700.372	-5.64198	41.8	Myosin regulatory light chain 2, skeletal muscle isoform OS=Bos taurus GN=MYLPF PE=2 SV=1
Q0P571|MLRS_BOVIN	LKGADPEDVIT	91	101	1022	27.5796	2	579.306	1156.6	-0.0587629	49.16	Myosin regulatory light chain 2, skeletal muscle isoform OS=Bos taurus GN=MYLPF PE=2 SV=1
Q0P571|MLRS_BOVIN	LKGADPEDVITGA	91	103	37	32.3239	2	643.335	1284.66	-0.787006	62.72	Myosin regulatory light chain 2, skeletal muscle isoform OS=Bos taurus GN=MYLPF PE=2 SV=1
Q0P571|MLRS_BOVIN	GADPEDVITGA	93	103	435	31.3026	2	522.746	1043.48	-0.0756051	76.14	Myosin regulatory light chain 2, skeletal muscle isoform OS=Bos taurus GN=MYLPF PE=2 SV=1
Q0P571|MLRS_BOVIN	KVLDPEGK	105	112	536	10.3281	2	443.255	884.496	-0.874695	47.15	Myosin regulatory light chain 2, skeletal muscle isoform OS=Bos taurus GN=MYLPF PE=2 SV=1
Q0P571|MLRS_BOVIN	FSQEEIK	131	137	181	16.8844	2	440.724	879.433	-0.680344	55.37	Myosin regulatory light chain 2, skeletal muscle isoform OS=Bos taurus GN=MYLPF PE=2 SV=1
Q0P571|MLRS_BOVIN	VITHGDAKDQE	159	169	7096	7.0441	2	606.795	1211.58	-1.8891	47.99	Myosin regulatory light chain 2, skeletal muscle isoform OS=Bos taurus GN=MYLPF PE=2 SV=1
Creatine kinase M-type OS=Bos taurus GN=CKM PE=1 SV=2
Accession	peptide sequence	Start_pos	end_pos	progenesis peptide number	Retention time (min)	Charge	m/z	Measured mass	Mass error (ppm)	Score	Description
Q9XSC6|KCRM_BOVIN	AEEEYPDLS	15	23	266	26.0009	2	526.724	1051.43	-0.307638	70.18	Creatine kinase M-type OS=Bos taurus GN=CKM PE=1 SV=2
Q9XSC6|KCRM_BOVIN	DKETPSG	43	49	2382	3.22333	2	367.172	732.329	0.331521	46.74	Creatine kinase M-type OS=Bos taurus GN=CKM PE=1 SV=2
Q9XSC6|KCRM_BOVIN	DKETPSGF	43	50	2345	17.3633	2	440.706	879.398	0.296255	48.71	Creatine kinase M-type OS=Bos taurus GN=CKM PE=1 SV=2
Q9XSC6|KCRM_BOVIN	FDKPVSPL	193	200	228	29.1621	2	451.753	901.491	-0.295118	44.58	Creatine kinase M-type OS=Bos taurus GN=CKM PE=1 SV=2
Q9XSC6|KCRM_BOVIN	GVDNPGHP	59	66	238	9.65945	2	396.685	791.356	0.0130244	55.26	Creatine kinase M-type OS=Bos taurus GN=CKM PE=1 SV=2
Q9XSC6|KCRM_BOVIN	GVDNPGHPF	59	67	381	23.0037	2	470.219	938.424	-0.47387	42.79	Creatine kinase M-type OS=Bos taurus GN=CKM PE=1 SV=2
Q9XSC6|KCRM_BOVIN	HGGFKPTD	96	103	96	9.1285	2	429.709	857.403	-0.419323	45.56	Creatine kinase M-type OS=Bos taurus GN=CKM PE=1 SV=2
Q9XSC6|KCRM_BOVIN	HGGFKPTDK	96	104	3432	6.49435	2	493.756	985.497	-0.886771	51.49	Creatine kinase M-type OS=Bos taurus GN=CKM PE=1 SV=2
Q9XSC6|KCRM_BOVIN	KAEEEYPDL	14	22	5402	26.2792	2	547.255	1092.49	-2.55156	45.7	Creatine kinase M-type OS=Bos taurus GN=CKM PE=1 SV=2
Q9XSC6|KCRM_BOVIN	NFKAEEEYPDLS	12	23	3907	31.3026	2	721.326	1440.64	-1.89755	42.11	Creatine kinase M-type OS=Bos taurus GN=CKM PE=1 SV=2
Q9XSC6|KCRM_BOVIN	PFGNTHN	1	7	108	7.30623	2	393.68	785.345	-0.701986	42.59	Creatine kinase M-type OS=Bos taurus GN=CKM PE=1 SV=2
Q9XSC6|KCRM_BOVIN	QLVVDGVK	350	357	1545	21.9736	2	429.261	856.508	6.71633	55.77	Creatine kinase M-type OS=Bos taurus GN=CKM PE=1 SV=2
Q9XSC6|KCRM_BOVIN	RGTGGVDTA	319	327	1720	6.2106	2	417.208	832.402	-2.69121	50.45	Creatine kinase M-type OS=Bos taurus GN=CKM PE=1 SV=2
Q9XSC6|KCRM_BOVIN	TLDDVIQT	51	58	136	30.2374	2	452.734	903.454	-0.787193	44.46	Creatine kinase M-type OS=Bos taurus GN=CKM PE=1 SV=2
Q9XSC6|KCRM_BOVIN	VWVNEEDHL	226	234	149	32.1059	2	570.77	1139.52	-0.186931	55.25	Creatine kinase M-type OS=Bos taurus GN=CKM PE=1 SV=2
Q9XSC6|KCRM_BOVIN	WVNEEDHL	227	234	1181	27.3015	2	521.235	1040.46	-0.581102	46.68	Creatine kinase M-type OS=Bos taurus GN=CKM PE=1 SV=2
Glycerol-3-phosphate dehydrogenase [NAD(+)], cytoplasmic OS=Bos taurus GN=GPD1 PE=2 SV=3
Accession	peptide sequence	Start_pos	end_pos	progenesis peptide number	Retention time (min)	Charge	m/z	Measured mass	Mass error (ppm)	Score	Description
Q5EA88|GPDA_BOVIN	VFEEDIGGR	39	47	2913	23.2095	2	511.251	1020.49	-0.554377	54.9	Glycerol-3-phosphate dehydrogenase [NAD(+)], cytoplasmic OS=Bos taurus GN=GPD1 PE=2 SV=3
Q5EA88|GPDA_BOVIN	KGVDEGPK	119	126	5512	4.40345	2	415.223	828.432	-2.15889	55.9	Glycerol-3-phosphate dehydrogenase [NAD(+)], cytoplasmic OS=Bos taurus GN=GPD1 PE=2 SV=3
Q5EA88|GPDA_BOVIN	GVDEGPK	120	126	5773	5.64553	2	351.177	700.339	-0.655901	43.18	Glycerol-3-phosphate dehydrogenase [NAD(+)], cytoplasmic OS=Bos taurus GN=GPD1 PE=2 SV=3
Tropomyosin alpha-1 chain OS=Bos taurus GN=TPM1 PE=2 SV=1
Accession	peptide sequence	Start_pos	end_pos	progenesis peptide number	Retention time (min)	Charge	m/z	Measured mass	Mass error (ppm)	Score	Description
Q5KR49|TPM1_BOVIN	SKQLEDELV	35	43	745	28.4322	2	530.779	1059.54	-0.830397	50.46	Tropomyosin alpha-1 chain OS=Bos taurus GN=TPM1 PE=2 SV=1
Q5KR49|TPM1_BOVIN	SKQLEDELVS	35	44	2054	25.8072	2	574.298	1146.58	4.61282	49.43	Tropomyosin alpha-1 chain OS=Bos taurus GN=TPM1 PE=2 SV=1
Q5KR49|TPM1_BOVIN	LKATEDELD	49	57	872	18.5959	2	517.256	1032.5	-0.208779	56.01	Tropomyosin alpha-1 chain OS=Bos taurus GN=TPM1 PE=2 SV=1
Q5KR49|TPM1_BOVIN	LKATEDELDK	49	58	2544	15.4693	2	581.303	1160.59	-0.562655	57.28	Tropomyosin alpha-1 chain OS=Bos taurus GN=TPM1 PE=2 SV=1
Q5KR49|TPM1_BOVIN	ATEDELDK	51	58	1476	10.0022	2	460.714	919.413	-0.528349	61.17	Tropomyosin alpha-1 chain OS=Bos taurus GN=TPM1 PE=2 SV=1
Q5KR49|TPM1_BOVIN	HIAEDADR	152	159	2348	5.7865	2	463.719	925.424	-1.09617	48.06	Tropomyosin alpha-1 chain OS=Bos taurus GN=TPM1 PE=2 SV=1
Q5KR49|TPM1_BOVIN	VIIESDLERA	169	178	9598	31.0099	2	572.813	1143.61	-1.16865	40.3	Tropomyosin alpha-1 chain OS=Bos taurus GN=TPM1 PE=2 SV=1
Actin, alpha skeletal muscle OS=Bos taurus GN=ACTA1 PE=1 SV=1
Accession	peptide sequence	Start_pos	end_pos	progenesis peptide number	Retention time (min)	Charge	m/z	Measured mass	Mass error (ppm)	Score	Description
P68138|ACTS_BOVIN	LVCDNGSGLV	9	18	2466	32.465	2	488.742	975.469	-0.53411	81.23	Actin, alpha skeletal muscle OS=Bos taurus GN=ACTA1 PE=1 SV=1
P68138|ACTS_BOVIN	VCDNGSGLV	10	18	773	23.3454	2	432.2	862.386	0.187916	49.89	Actin, alpha skeletal muscle OS=Bos taurus GN=ACTA1 PE=1 SV=1
P68138|ACTS_BOVIN	VCDNGSGLVK	10	19	8818	16.6947	2	496.247	990.48	-0.758705	63.92	Actin, alpha skeletal muscle OS=Bos taurus GN=ACTA1 PE=1 SV=1
P68138|ACTS_BOVIN	DNGSGLVK	12	19	3682	10.0691	2	395.209	788.403	0.55313	41.01	Actin, alpha skeletal muscle OS=Bos taurus GN=ACTA1 PE=1 SV=1
P68138|ACTS_BOVIN	AGFAGDDAP	20	28	9354	22.1819	2	410.677	819.339	-0.516807	42.38	Actin, alpha skeletal muscle OS=Bos taurus GN=ACTA1 PE=1 SV=1
P68138|ACTS_BOVIN	AGFAGDDAPR	20	29	4	16.8236	2	488.727	975.44	-0.893192	70.47	Actin, alpha skeletal muscle OS=Bos taurus GN=ACTA1 PE=1 SV=1
P68138|ACTS_BOVIN	GFAGDDAPR	21	29	213	15.4052	2	453.208	904.402	-1.71038	49.5	Actin, alpha skeletal muscle OS=Bos taurus GN=ACTA1 PE=1 SV=1
P68138|ACTS_BOVIN	FAGDDAPR	22	29	993	12.8181	2	424.698	847.382	-0.499691	58.57	Actin, alpha skeletal muscle OS=Bos taurus GN=ACTA1 PE=1 SV=1
P68138|ACTS_BOVIN	AGDDAPR	23	29	215	3.7129	2	351.164	700.314	0.356673	64.25	Actin, alpha skeletal muscle OS=Bos taurus GN=ACTA1 PE=1 SV=1
P68138|ACTS_BOVIN	AVFPSIVGRPR	30	40	2347	32.9536	2	599.856	1197.7	-0.765891	60.21	Actin, alpha skeletal muscle OS=Bos taurus GN=ACTA1 PE=1 SV=1
P68138|ACTS_BOVIN	PSIVGRPR	33	40	666	13.4234	2	441.269	880.523	-1.62394	50.05	Actin, alpha skeletal muscle OS=Bos taurus GN=ACTA1 PE=1 SV=1
P68138|ACTS_BOVIN	HQGVMVGMGQ	41	50	4059	22.1096	2	522.242	1042.47	-0.226886	49.52	Actin, alpha skeletal muscle OS=Bos taurus GN=ACTA1 PE=1 SV=1
P68138|ACTS_BOVIN	HQGVMVGMGQK	41	51	5490	17.7025	2	586.288	1170.56	-1.27101	53.04	Actin, alpha skeletal muscle OS=Bos taurus GN=ACTA1 PE=1 SV=1
P68138|ACTS_BOVIN	DSYVGDEAQ	52	60	3101	15.1401	2	492.201	982.388	-0.14807	57.76	Actin, alpha skeletal muscle OS=Bos taurus GN=ACTA1 PE=1 SV=1
P68138|ACTS_BOVIN	DSYVGDEAQS	52	61	386	15.3447	2	535.717	1069.42	-0.967458	79.94	Actin, alpha skeletal muscle OS=Bos taurus GN=ACTA1 PE=1 SV=1
P68138|ACTS_BOVIN	DSYVGDEAQSK	52	62	204	13.1574	2	599.764	1197.51	-0.909258	61.19	Actin, alpha skeletal muscle OS=Bos taurus GN=ACTA1 PE=1 SV=1
P68138|ACTS_BOVIN	VGDEAQSK	55	62	5067	3.50748	2	417.205	832.394	2.12975	54.8	Actin, alpha skeletal muscle OS=Bos taurus GN=ACTA1 PE=1 SV=1
P68138|ACTS_BOVIN	GIITNWDDMEK	75	85	3483	32.6021	2	669.305	1336.59	-1.58495	60.72	Actin, alpha skeletal muscle OS=Bos taurus GN=ACTA1 PE=1 SV=1
P68138|ACTS_BOVIN	ITNWDDMEK	77	85	1421	26.9514	2	576.261	1150.51	9.24998	49.9	Actin, alpha skeletal muscle OS=Bos taurus GN=ACTA1 PE=1 SV=1
P68138|ACTS_BOVIN	VAPEEHPTL	97	105	821	22.5286	2	496.756	991.497	-0.764282	43.78	Actin, alpha skeletal muscle OS=Bos taurus GN=ACTA1 PE=1 SV=1
P68138|ACTS_BOVIN	VAPEEHPTLL	97	106	655	30.5265	2	553.298	1104.58	-0.214344	55.8	Actin, alpha skeletal muscle OS=Bos taurus GN=ACTA1 PE=1 SV=1
P68138|ACTS_BOVIN	LLTEAPLNPK	105	114	1100	28.5025	2	548.324	1094.63	-0.724829	46.03	Actin, alpha skeletal muscle OS=Bos taurus GN=ACTA1 PE=1 SV=1
P68138|ACTS_BOVIN	LTEAPLNPK	106	114	25	20.2727	2	491.782	981.549	-0.853034	49.06	Actin, alpha skeletal muscle OS=Bos taurus GN=ACTA1 PE=1 SV=1
P68138|ACTS_BOVIN	TEAPLNPK	107	114	3	13.6054	2	435.24	868.465	-0.18126	50.87	Actin, alpha skeletal muscle OS=Bos taurus GN=ACTA1 PE=1 SV=1
P68138|ACTS_BOVIN	EKMTQIM	118	124	539	23.8198	2	440.717	879.42	0.17643	45.4	Actin, alpha skeletal muscle OS=Bos taurus GN=ACTA1 PE=1 SV=1
P68138|ACTS_BOVIN	VLDSGDGVTH	153	162	123	14.1982	2	500.241	998.467	0.0223508	72.8	Actin, alpha skeletal muscle OS=Bos taurus GN=ACTA1 PE=1 SV=1
P68138|ACTS_BOVIN	VLDSGDGVTHNVPI	153	166	7583	33.1627	2	711.859	1421.7	-8.79572	62.17	Actin, alpha skeletal muscle OS=Bos taurus GN=ACTA1 PE=1 SV=1
P68138|ACTS_BOVIN	LDSGDGVTH	154	162	596	9.1285	2	450.706	899.398	-0.293162	72.07	Actin, alpha skeletal muscle OS=Bos taurus GN=ACTA1 PE=1 SV=1
P68138|ACTS_BOVIN	LDSGDGVTHNVPI	154	166	12681	30.0905	2	662.331	1322.65	-0.144632	58.51	Actin, alpha skeletal muscle OS=Bos taurus GN=ACTA1 PE=1 SV=1
P68138|ACTS_BOVIN	DSGDGVTH	155	162	619	3.50748	2	394.164	786.314	-0.156967	55.89	Actin, alpha skeletal muscle OS=Bos taurus GN=ACTA1 PE=1 SV=1
P68138|ACTS_BOVIN	ALDFENE	221	227	6085	27.1628	2	419.185	836.355	0.224152	44.16	Actin, alpha skeletal muscle OS=Bos taurus GN=ACTA1 PE=1 SV=1
P68138|ACTS_BOVIN	DFENEMA	223	229	1127	25.1449	2	428.163	854.312	0.0805163	40.38	Actin, alpha skeletal muscle OS=Bos taurus GN=ACTA1 PE=1 SV=1
P68138|ACTS_BOVIN	DFENEMAT	223	230	882	25.7495	2	478.687	955.359	-0.488642	47.67	Actin, alpha skeletal muscle OS=Bos taurus GN=ACTA1 PE=1 SV=1
P68138|ACTS_BOVIN	DFENEMATA	223	231	2339	29.0905	2	514.205	1026.4	-0.582849	51.49	Actin, alpha skeletal muscle OS=Bos taurus GN=ACTA1 PE=1 SV=1
P68138|ACTS_BOVIN	SSSSLEK	233	239	1392	4.18852	2	369.187	736.359	-1.20098	53.18	Actin, alpha skeletal muscle OS=Bos taurus GN=ACTA1 PE=1 SV=1
P68138|ACTS_BOVIN	EKSYELPDGQ	238	247	3191	22.1096	2	583.271	1164.53	-1.47206	52.72	Actin, alpha skeletal muscle OS=Bos taurus GN=ACTA1 PE=1 SV=1
P68138|ACTS_BOVIN	SYELPDGQ	240	247	84	25.3328	2	454.703	907.392	0.0688635	46.51	Actin, alpha skeletal muscle OS=Bos taurus GN=ACTA1 PE=1 SV=1
P68138|ACTS_BOVIN	SYELPDGQV	240	248	518	32.6021	2	504.237	1006.46	-0.401618	65.94	Actin, alpha skeletal muscle OS=Bos taurus GN=ACTA1 PE=1 SV=1
P68138|ACTS_BOVIN	IGMESAGIHETT	268	279	7510	25.0782	2	623.291	1244.57	-1.83929	64.84	Actin, alpha skeletal muscle OS=Bos taurus GN=ACTA1 PE=1 SV=1
P68138|ACTS_BOVIN	GMESAGIH	269	276	2816	13.2241	2	401.182	800.349	0.115461	45.95	Actin, alpha skeletal muscle OS=Bos taurus GN=ACTA1 PE=1 SV=1
P68138|ACTS_BOVIN	GMESAGIHET	269	278	2682	16.562	2	516.226	1030.44	-1.58153	61.78	Actin, alpha skeletal muscle OS=Bos taurus GN=ACTA1 PE=1 SV=1
P68138|ACTS_BOVIN	GMESAGIHETT	269	279	541	17.9145	2	566.75	1131.49	-0.434328	66.93	Actin, alpha skeletal muscle OS=Bos taurus GN=ACTA1 PE=1 SV=1
P68138|ACTS_BOVIN	GMESAGIHETTY	269	280	4211	24.6569	2	648.282	1294.55	-0.954001	64.69	Actin, alpha skeletal muscle OS=Bos taurus GN=ACTA1 PE=1 SV=1
P68138|ACTS_BOVIN	GMESAGIHETTYN	269	281	5518	22.3907	2	705.303	1408.59	-1.19311	61.64	Actin, alpha skeletal muscle OS=Bos taurus GN=ACTA1 PE=1 SV=1
P68138|ACTS_BOVIN	SAGIHETT	272	279	1016	8.73353	2	408.198	814.382	-0.633165	45.61	Actin, alpha skeletal muscle OS=Bos taurus GN=ACTA1 PE=1 SV=1
P68138|ACTS_BOVIN	ANNVMSGGTTM	296	306	1816	23.4152	2	541.734	1081.45	-0.131151	87.51	Actin, alpha skeletal muscle OS=Bos taurus GN=ACTA1 PE=1 SV=1
P68138|ACTS_BOVIN	ANNVMSGGTTMY	296	307	8313	30.1651	2	623.265	1244.52	-0.317487	63.89	Actin, alpha skeletal muscle OS=Bos taurus GN=ACTA1 PE=1 SV=1
P68138|ACTS_BOVIN	SGGTTMYPGIA	301	311	1474	31.3717	2	527.747	1053.48	-0.170543	44.7	Actin, alpha skeletal muscle OS=Bos taurus GN=ACTA1 PE=1 SV=1
P68138|ACTS_BOVIN	SGGTTMYPGIAD	301	312	73	30.5932	2	585.26	1168.51	-0.933566	58.32	Actin, alpha skeletal muscle OS=Bos taurus GN=ACTA1 PE=1 SV=1
P68138|ACTS_BOVIN	SGGTTMYPGIADR	301	313	2504	26.8846	2	663.312	1324.61	0.90611	55.09	Actin, alpha skeletal muscle OS=Bos taurus GN=ACTA1 PE=1 SV=1
P68138|ACTS_BOVIN	TMYPGIAD	305	312	5638	29.5075	2	434.2	866.385	0.256661	41.91	Actin, alpha skeletal muscle OS=Bos taurus GN=ACTA1 PE=1 SV=1
P68138|ACTS_BOVIN	MYPGIAD	306	312	3013	27.2335	2	383.676	765.337	-0.0490636	40.78	Actin, alpha skeletal muscle OS=Bos taurus GN=ACTA1 PE=1 SV=1
P68138|ACTS_BOVIN	PGIADR	308	313	5245	8.4639	2	314.674	627.334	-0.480232	41.38	Actin, alpha skeletal muscle OS=Bos taurus GN=ACTA1 PE=1 SV=1
P68138|ACTS_BOVIN	EITALAPST	317	325	60	27.4396	2	451.745	901.476	0.217542	50.66	Actin, alpha skeletal muscle OS=Bos taurus GN=ACTA1 PE=1 SV=1
P68138|ACTS_BOVIN	EITALAPSTMK	317	327	3475	29.0905	2	581.313	1160.61	-0.219911	51.64	Actin, alpha skeletal muscle OS=Bos taurus GN=ACTA1 PE=1 SV=1
P68138|ACTS_BOVIN	IKIIAPPE	328	335	107	30.2374	2	440.779	879.543	0.341428	43.18	Actin, alpha skeletal muscle OS=Bos taurus GN=ACTA1 PE=1 SV=1
P68138|ACTS_BOVIN	KIIAPPE	329	335	654	20.2727	2	384.237	766.459	-0.342996	56.17	Actin, alpha skeletal muscle OS=Bos taurus GN=ACTA1 PE=1 SV=1
P68138|ACTS_BOVIN	IIAPPERK	330	337	1146	14.5353	3	308.527	922.559	-0.554271	41.15	Actin, alpha skeletal muscle OS=Bos taurus GN=ACTA1 PE=1 SV=1
P68138|ACTS_BOVIN	ITKQEYDEAGPSIV	358	371	6446	30.3071	2	775.389	1548.76	-1.74046	75.18	Actin, alpha skeletal muscle OS=Bos taurus GN=ACTA1 PE=1 SV=1
P68138|ACTS_BOVIN	TKQEYDEAGPSIV	359	371	6038	28.1571	2	718.848	1435.68	-1.10229	54.95	Actin, alpha skeletal muscle OS=Bos taurus GN=ACTA1 PE=1 SV=1
P68138|ACTS_BOVIN	KQEYDEAGPSIV	360	371	5022	27.9407	2	668.325	1334.64	0.0129288	50.63	Actin, alpha skeletal muscle OS=Bos taurus GN=ACTA1 PE=1 SV=1
P68138|ACTS_BOVIN	QEYDEAGPS	361	369	8725	13.9335	2	498.201	994.388	0.0115662	48.61	Actin, alpha skeletal muscle OS=Bos taurus GN=ACTA1 PE=1 SV=1
P68138|ACTS_BOVIN	QEYDEAGPSIV	361	371	1588	31.5173	2	604.276	1206.54	-1.69597	67.21	Actin, alpha skeletal muscle OS=Bos taurus GN=ACTA1 PE=1 SV=1
P68138|ACTS_BOVIN	QEYDEAGPSIVH	361	372	585	25.2738	2	672.806	1343.6	-0.733435	59.17	Actin, alpha skeletal muscle OS=Bos taurus GN=ACTA1 PE=1 SV=1
P68138|ACTS_BOVIN	EYDEAGPS	362	369	2808	12.013	2	434.172	866.329	-0.152582	44.74	Actin, alpha skeletal muscle OS=Bos taurus GN=ACTA1 PE=1 SV=1
P68138|ACTS_BOVIN	EYDEAGPSI	362	370	2717	26.4029	2	490.714	979.414	0.156766	49.91	Actin, alpha skeletal muscle OS=Bos taurus GN=ACTA1 PE=1 SV=1
P68138|ACTS_BOVIN	EYDEAGPSIV	362	371	197	30.8026	2	540.248	1078.48	0.16074	41.41	Actin, alpha skeletal muscle OS=Bos taurus GN=ACTA1 PE=1 SV=1
P68138|ACTS_BOVIN	EYDEAGPSIVH	362	372	38	24.2353	2	608.777	1215.54	-0.366195	48.03	Actin, alpha skeletal muscle OS=Bos taurus GN=ACTA1 PE=1 SV=1
P68138|ACTS_BOVIN	DEAGPSIVH	364	372	118	17.8454	2	462.724	923.434	-1.08492	53.54	Actin, alpha skeletal muscle OS=Bos taurus GN=ACTA1 PE=1 SV=1
Troponin C, slow skeletal and cardiac muscles OS=Bos taurus GN=TNNC1 PE=1 SV=1
Accession	peptide sequence	Start_pos	end_pos	progenesis peptide number	Retention time (min)	Charge	m/z	Measured mass	Mass error (ppm)	Score	Description
P63315|TNNC1_BOVIN	MLGQNPTPE	46	54	2900	21.8345	2	493.734	985.453	-0.516327	46.42	Troponin C, slow skeletal and cardiac muscles OS=Bos taurus GN=TNNC1 PE=1 SV=1
P63315|TNNC1_BOVIN	IDEVDEDGSGTVD	60	72	7224	20.6818	2	675.777	1349.54	-4.99942	59.27	Troponin C, slow skeletal and cardiac muscles OS=Bos taurus GN=TNNC1 PE=1 SV=1
Calsequestrin OS=Bos taurus GN=casq1 PE=2 SV=1
Accession	peptide sequence	Start_pos	end_pos	progenesis peptide number	Retention time (min)	Charge	m/z	Measured mass	Mass error (ppm)	Score	Description
Q05JF3|Q05JF3_BOVIN	GMVDSEKDAAVA	106	117	1354	19.6735	2	596.779	1191.54	-0.934486	53.41	Calsequestrin OS=Bos taurus GN=casq1 PE=2 SV=1
Q05JF3|Q05JF3_BOVIN	KLGLTEED	119	126	4276	19.4761	2	452.734	903.454	-1.50835	46	Calsequestrin OS=Bos taurus GN=casq1 PE=2 SV=1
Q05JF3|Q05JF3_BOVIN	KLGLTEEDSV	119	128	1162	27.2335	2	545.785	1089.55	-0.583164	63.97	Calsequestrin OS=Bos taurus GN=casq1 PE=2 SV=1
Q05JF3|Q05JF3_BOVIN	VFKGDEV	130	136	2852	17.4299	2	397.208	792.401	-0.499474	41.62	Calsequestrin OS=Bos taurus GN=casq1 PE=2 SV=1
Q05JF3|Q05JF3_BOVIN	VFKGDEVIE	130	138	509	25.4649	2	518.273	1034.53	2.80462	47.3	Calsequestrin OS=Bos taurus GN=casq1 PE=2 SV=1
Q05JF3|Q05JF3_BOVIN	VFKGDEVIEY	130	139	2887	33.3811	2	599.803	1197.59	-0.995762	52	Calsequestrin OS=Bos taurus GN=casq1 PE=2 SV=1
Q05JF3|Q05JF3_BOVIN	ENIEDDNKL	173	181	2989	20.4051	2	545.258	1088.5	1.72818	50.74	Calsequestrin OS=Bos taurus GN=casq1 PE=2 SV=1
Q05JF3|Q05JF3_BOVIN	ENIEDDNKLI	173	182	2224	29.4402	2	601.798	1201.58	-1.15329	44.08	Calsequestrin OS=Bos taurus GN=casq1 PE=2 SV=1
Q05JF3|Q05JF3_BOVIN	ENIEDDNKLIG	173	183	917	27.1628	2	630.309	1258.6	-1.12413	65.31	Calsequestrin OS=Bos taurus GN=casq1 PE=2 SV=1
Q05JF3|Q05JF3_BOVIN	KAYEDAAEEFHP	194	205	4811	27.7228	3	469.546	1405.61	-0.0424723	47.79	Calsequestrin OS=Bos taurus GN=casq1 PE=2 SV=1
Q05JF3|Q05JF3_BOVIN	KAYEDAAEEFHPY	194	206	10055	31.4437	2	785.345	1568.68	-1.40058	66.85	Calsequestrin OS=Bos taurus GN=casq1 PE=2 SV=1
Q05JF3|Q05JF3_BOVIN	AYEDAAEEFHP	195	205	2847	30.8744	2	639.767	1277.52	-0.884006	88.1	Calsequestrin OS=Bos taurus GN=casq1 PE=2 SV=1
Q05JF3|Q05JF3_BOVIN	EDAAEEFHPY	197	206	2017	29.7303	2	604.248	1206.48	-0.379472	54.7	Calsequestrin OS=Bos taurus GN=casq1 PE=2 SV=1
Q05JF3|Q05JF3_BOVIN	MEEPVTIPDKPN	235	246	3240	30.3071	2	685.336	1368.66	-0.875584	41.15	Calsequestrin OS=Bos taurus GN=casq1 PE=2 SV=1
Q05JF3|Q05JF3_BOVIN	MEEPVTIPDKPNSE	235	248	2906	30.4544	2	793.373	1584.73	-1.08699	47.54	Calsequestrin OS=Bos taurus GN=casq1 PE=2 SV=1
Q05JF3|Q05JF3_BOVIN	PDKPNSEEEIV	242	252	2633	21.1586	2	628.803	1255.59	-1.22557	58.85	Calsequestrin OS=Bos taurus GN=casq1 PE=2 SV=1
Q05JF3|Q05JF3_BOVIN	PDKPNSEEEIVS	242	253	3341	19.0083	2	672.319	1342.62	-0.562374	56.93	Calsequestrin OS=Bos taurus GN=casq1 PE=2 SV=1
Q05JF3|Q05JF3_BOVIN	DNTDNPDLSI	308	317	13020	30.1651	2	552.246	1102.48	0.122234	41.33	Calsequestrin OS=Bos taurus GN=casq1 PE=2 SV=1
Q05JF3|Q05JF3_BOVIN	NIDLSAPQ	337	344	982	26.4029	2	429.222	856.43	1.19682	54.8	Calsequestrin OS=Bos taurus GN=casq1 PE=2 SV=1
Q05JF3|Q05JF3_BOVIN	EMDDEEDLPSAE	359	370	632	26.6827	2	690.26	1378.51	-1.67538	67.82	Calsequestrin OS=Bos taurus GN=casq1 PE=2 SV=1
Q05JF3|Q05JF3_BOVIN	EDVLEGEINT	377	386	7561	32.3239	2	559.763	1117.51	-1.62028	49.12	Calsequestrin OS=Bos taurus GN=casq1 PE=2 SV=1
Q05JF3|Q05JF3_BOVIN	EDVLEGEINTE	377	387	2198	32.2506	2	624.285	1246.56	-0.123421	85.33	Calsequestrin OS=Bos taurus GN=casq1 PE=2 SV=1
Annexin A6 OS=Bos taurus GN=ANXA6 PE=1 SV=2
Accession	peptide sequence	Start_pos	end_pos	progenesis peptide number	Retention time (min)	Charge	m/z	Measured mass	Mass error (ppm)	Score	Description
P79134|ANXA6_BOVIN	DAISGIGTDEK	102	112	8347	20.6818	2	553.27	1104.53	-3.43197	55.31	Annexin A6 OS=Bos taurus GN=ANXA6 PE=1 SV=2
P79134|ANXA6_BOVIN	DLEADITGDTSGH	140	152	7024	30.0195	2	665.791	1329.57	-1.22039	75.49	Annexin A6 OS=Bos taurus GN=ANXA6 PE=1 SV=2
Alpha-crystallin B chain OS=Bos taurus GN=CRYAB PE=1 SV=2
Accession	peptide sequence	Start_pos	end_pos	progenesis peptide number	Retention time (min)	Charge	m/z	Measured mass	Mass error (ppm)	Score	Description
P02510|CRYAB_BOVIN	VLGDVIEVH	92	100	3070	32.395	2	490.774	979.533	-0.671516	67.15	Alpha-crystallin B chain OS=Bos taurus GN=CRYAB PE=1 SV=2
P02510|CRYAB_BOVIN	RIPADVDPL	122	130	2365	33.3811	2	498.279	994.544	-0.548256	59.05	Alpha-crystallin B chain OS=Bos taurus GN=CRYAB PE=1 SV=2
P02510|CRYAB_BOVIN	KQASGPE	149	155	6118	2.9747	2	358.682	715.35	-0.557846	49.88	Alpha-crystallin B chain OS=Bos taurus GN=CRYAB PE=1 SV=2
Histone H4 OS=Bos taurus GN=LOC619094 PE=3 SV=1
Accession	peptide sequence	Start_pos	end_pos	progenesis peptide number	Retention time (min)	Charge	m/z	Measured mass	Mass error (ppm)	Score	Description
E1B7N2|E1B7N2_BOVIN	RDNIQGITKPA	23	33	6260	18.4566	2	606.838	1211.66	-0.970361	46.82	Histone H4 OS=Bos taurus GN=LOC619094 PE=3 SV=1
E1B7N2|E1B7N2_BOVIN	DNIQGITKPA	24	33	2728	21.0272	2	528.787	1055.56	-2.16289	59.88	Histone H4 OS=Bos taurus GN=LOC619094 PE=3 SV=1
E1B7N2|E1B7N2_BOVIN	DNIQGITKPAI	24	34	11954	31.8111	2	585.329	1168.64	-2.14903	63.25	Histone H4 OS=Bos taurus GN=LOC619094 PE=3 SV=1
Myosin-1 OS=Bos taurus GN=MYH1 PE=2 SV=2
Accession	peptide sequence	Start_pos	end_pos	progenesis peptide number	Retention time (min)	Charge	m/z	Measured mass	Mass error (ppm)	Score	Description
Q9BE40|MYH1_BOVIN	MQGTLEDQI	214	222	2700	30.7313	2	517.745	1033.48	0.478465	49.64	Myosin-1 OS=Bos taurus GN=MYH1 PE=2 SV=2
Q9BE40|MYH1_BOVIN	GEITVPS	318	324	3827	23.9587	2	351.687	701.36	-0.0342249	49.57	Myosin-1 OS=Bos taurus GN=MYH1 PE=2 SV=2
Q9BE40|MYH1_BOVIN	VKVGNEFVT	406	414	3505	26.5467	2	496.774	991.534	-0.38775	43.77	Myosin-1 OS=Bos taurus GN=MYH1 PE=2 SV=2
Q9BE40|MYH1_BOVIN	FSGPASGEAEGGPK	623	636	534	18.2523	2	645.801	1289.59	-1.25674	69.54	Myosin-1 OS=Bos taurus GN=MYH1 PE=2 SV=2
Q9BE40|MYH1_BOVIN	SGPASGEAEGGPK	624	636	473	9.19085	2	572.267	1142.52	-0.953086	64.63	Myosin-1 OS=Bos taurus GN=MYH1 PE=2 SV=2
Q9BE40|MYH1_BOVIN	EMANMKEEFE	850	859	6840	27.6496	2	629.262	1256.51	2.67603	43.67	Myosin-1 OS=Bos taurus GN=MYH1 PE=2 SV=2
Q9BE40|MYH1_BOVIN	EMANMKEEFEK	850	860	4977	23.6861	2	693.31	1384.61	3.503	66.68	Myosin-1 OS=Bos taurus GN=MYH1 PE=2 SV=2
Q9BE40|MYH1_BOVIN	TQEKNDLQLQ	883	892	4500	18.528	2	608.812	1215.61	-0.84479	63.41	Myosin-1 OS=Bos taurus GN=MYH1 PE=2 SV=2
Q9BE40|MYH1_BOVIN	TQEKNDLQLQVQ	883	894	2459	25.6076	2	722.372	1442.73	-4.27509	54.19	Myosin-1 OS=Bos taurus GN=MYH1 PE=2 SV=2
Q9BE40|MYH1_BOVIN	LAQESTMDIENDKQQ	1063	1077	4904	22.6641	2	875.401	1748.79	-1.18336	80.23	Myosin-1 OS=Bos taurus GN=MYH1 PE=2 SV=2
Q9BE40|MYH1_BOVIN	LAQESTMDIENDKQQL	1063	1078	2845	31.8877	2	931.943	1861.87	-0.934891	77.87	Myosin-1 OS=Bos taurus GN=MYH1 PE=2 SV=2
Q9BE40|MYH1_BOVIN	QESTMDIENDKQ	1065	1076	3809	17.4993	2	719.311	1436.61	-0.599381	74.98	Myosin-1 OS=Bos taurus GN=MYH1 PE=2 SV=2
Q9BE40|MYH1_BOVIN	QESTMDIENDKQQL	1065	1078	4633	28.2951	2	839.882	1677.75	-1.08327	69.94	Myosin-1 OS=Bos taurus GN=MYH1 PE=2 SV=2
Q9BE40|MYH1_BOVIN	STMDIENDKQ	1067	1076	7026	15.4693	2	590.761	1179.51	-0.827759	63.12	Myosin-1 OS=Bos taurus GN=MYH1 PE=2 SV=2
Q9BE40|MYH1_BOVIN	TMDIENDKQQ	1068	1077	5741	14.6047	2	611.274	1220.53	-0.506334	47.76	Myosin-1 OS=Bos taurus GN=MYH1 PE=2 SV=2
Q9BE40|MYH1_BOVIN	ALEDQLSELK	1253	1262	8895	32.465	2	573.305	1144.6	-1.84656	54.46	Myosin-1 OS=Bos taurus GN=MYH1 PE=2 SV=2
Q9BE40|MYH1_BOVIN	REQYEEEQEGK	1346	1356	820	8.79302	2	712.817	1423.62	-1.16353	66.15	Myosin-1 OS=Bos taurus GN=MYH1 PE=2 SV=2
Q9BE40|MYH1_BOVIN	REQYEEEQEGKAELQ	1346	1360	2866	19.1428	3	622.621	1864.84	-0.941683	75.64	Myosin-1 OS=Bos taurus GN=MYH1 PE=2 SV=2
Q9BE40|MYH1_BOVIN	LQDAEEH	1399	1405	307	5.92323	2	421.188	840.361	-0.226643	45.83	Myosin-1 OS=Bos taurus GN=MYH1 PE=2 SV=2
Q9BE40|MYH1_BOVIN	MEGDLNEM	1620	1627	544	26.2792	2	469.683	937.352	-0.627084	43.86	Myosin-1 OS=Bos taurus GN=MYH1 PE=2 SV=2
Q9BE40|MYH1_BOVIN	NLEQTVK	1787	1793	2757	13.3612	2	416.232	830.449	-1.25723	40.95	Myosin-1 OS=Bos taurus GN=MYH1 PE=2 SV=2
6-phosphofructokinase, muscle type OS=Bos taurus GN=PFKM PE=2 SV=1
Accession	peptide sequence	Start_pos	end_pos	progenesis peptide number	Retention time (min)	Charge	m/z	Measured mass	Mass error (ppm)	Score	Description
Q0IIG5|K6PF_BOVIN	GHMQQGGSPTPF	658	669	6855	24.4431	2	622.279	1242.54	-1.11155	47.14	6-phosphofructokinase, muscle type OS=Bos taurus GN=PFKM PE=2 SV=1
Q0IIG5|K6PF_BOVIN	MQQGGSPTPF	660	669	5701	27.7228	2	525.239	1048.46	-0.967578	59.5	6-phosphofructokinase, muscle type OS=Bos taurus GN=PFKM PE=2 SV=1
Q0IIG5|K6PF_BOVIN	YEIDLDTSEH	753	762	5543	29.2333	2	611.269	1220.52	2.67589	55.86	6-phosphofructokinase, muscle type OS=Bos taurus GN=PFKM PE=2 SV=1
Myosin-2 OS=Bos taurus GN=MYH2 PE=2 SV=1
Accession	peptide sequence	Start_pos	end_pos	progenesis peptide number	Retention time (min)	Charge	m/z	Measured mass	Mass error (ppm)	Score	Description
F1MRC2|F1MRC2_BOVIN	IQGTLEDQI	214	222	2825	31.2278	2	508.766	1015.52	-0.209443	47.87	Myosin-2 OS=Bos taurus GN=MYH2 PE=2 SV=1
F1MRC2|F1MRC2_BOVIN	GFTNEEKV	342	349	1493	19.2745	2	462.227	922.439	-0.883197	47.89	Myosin-2 OS=Bos taurus GN=MYH2 PE=2 SV=1
F1MRC2|F1MRC2_BOVIN	LFSGTPTGDSEASGGT	622	637	2465	25.6076	2	742.329	1482.64	-2.45457	100.32	Myosin-2 OS=Bos taurus GN=MYH2 PE=2 SV=1
F1MRC2|F1MRC2_BOVIN	LFSGTPTGDSEASGGTK	622	638	4129	22.1096	2	806.374	1610.73	-5.92196	93.43	Myosin-2 OS=Bos taurus GN=MYH2 PE=2 SV=1
F1MRC2|F1MRC2_BOVIN	FSGTPTGDSEASGGT	623	637	2521	18.2523	2	685.788	1369.56	-1.24683	46.22	Myosin-2 OS=Bos taurus GN=MYH2 PE=2 SV=1
F1MRC2|F1MRC2_BOVIN	FSGTPTGDSEASGGTK	623	638	3523	15.4052	2	749.838	1497.66	2.46166	75.42	Myosin-2 OS=Bos taurus GN=MYH2 PE=2 SV=1
F1MRC2|F1MRC2_BOVIN	SGTPTGDSEASGGTK	624	638	3400	7.77603	2	676.301	1350.59	-1.2812	77.18	Myosin-2 OS=Bos taurus GN=MYH2 PE=2 SV=1
F1MRC2|F1MRC2_BOVIN	LLASIDIDHTQ	749	759	1992	30.9445	2	613.325	1224.63	-0.361161	48.59	Myosin-2 OS=Bos taurus GN=MYH2 PE=2 SV=1
F1MRC2|F1MRC2_BOVIN	SAETEKEMATM	846	856	3172	20.012	2	614.265	1226.52	-0.0123392	61.02	Myosin-2 OS=Bos taurus GN=MYH2 PE=2 SV=1
F1MRC2|F1MRC2_BOVIN	LAQESIMDIENEKQ	1065	1078	5881	33.1627	2	824.39	1646.77	-9.52657	89.55	Myosin-2 OS=Bos taurus GN=MYH2 PE=2 SV=1
F1MRC2|F1MRC2_BOVIN	AQESIMDIENEK	1066	1077	14444	30.0195	2	703.826	1405.64	-1.64193	60.25	Myosin-2 OS=Bos taurus GN=MYH2 PE=2 SV=1
F1MRC2|F1MRC2_BOVIN	QESIMDIENEKQ	1067	1078	4115	28.8695	2	732.339	1462.66	1.7723	71.84	Myosin-2 OS=Bos taurus GN=MYH2 PE=2 SV=1
F1MRC2|F1MRC2_BOVIN	SIMDIENEK	1069	1077	719	26.6129	2	539.758	1077.5	-0.24643	57.24	Myosin-2 OS=Bos taurus GN=MYH2 PE=2 SV=1
F1MRC2|F1MRC2_BOVIN	SIMDIENEKQQ	1069	1079	5954	25.4649	2	667.815	1333.62	-1.97298	54.33	Myosin-2 OS=Bos taurus GN=MYH2 PE=2 SV=1
F1MRC2|F1MRC2_BOVIN	TLEDQVNEL	1255	1263	1892	32.6021	2	530.761	1059.51	-0.544243	50.02	Myosin-2 OS=Bos taurus GN=MYH2 PE=2 SV=1
F1MRC2|F1MRC2_BOVIN	REQYEEEQES	1348	1357	3753	10.4681	2	663.776	1325.54	0.0144863	50.05	Myosin-2 OS=Bos taurus GN=MYH2 PE=2 SV=1
F1MRC2|F1MRC2_BOVIN	REQYEEEQESK	1348	1358	1452	8.5362	2	727.823	1453.63	-1.13448	67.25	Myosin-2 OS=Bos taurus GN=MYH2 PE=2 SV=1
F1MRC2|F1MRC2_BOVIN	REQYEEEQESKAELQ	1348	1362	5608	19.0083	3	632.625	1894.85	-0.971995	86.59	Myosin-2 OS=Bos taurus GN=MYH2 PE=2 SV=1
F1MRC2|F1MRC2_BOVIN	LQAAEEHVEAV	1401	1411	1010	23.4836	2	598.301	1194.59	0.305552	62.83	Myosin-2 OS=Bos taurus GN=MYH2 PE=2 SV=1
F1MRC2|F1MRC2_BOVIN	AELEAAQ	1469	1475	13439	11.9515	2	366.182	730.35	0.358297	42.31	Myosin-2 OS=Bos taurus GN=MYH2 PE=2 SV=1
F1MRC2|F1MRC2_BOVIN	MLDAEIR	1604	1610	3052	23.5498	2	424.22	846.426	-0.678192	42.77	Myosin-2 OS=Bos taurus GN=MYH2 PE=2 SV=1
Glyceraldehyde-3-phosphate dehydrogenase OS=Bos taurus GN=GAPDH PE=1 SV=4
Accession	peptide sequence	Start_pos	end_pos	progenesis peptide number	Retention time (min)	Charge	m/z	Measured mass	Mass error (ppm)	Score	Description
P10096|G3P_BOVIN	VKVGVN	1	6	287	11.0692	2	308.195	614.375	-0.802678	44.37	Glyceraldehyde-3-phosphate dehydrogenase OS=Bos taurus GN=GAPDH PE=1 SV=4
P10096|G3P_BOVIN	VKVGVNGFG	1	9	187	27.5796	2	438.751	875.486	-0.0473103	52.24	Glyceraldehyde-3-phosphate dehydrogenase OS=Bos taurus GN=GAPDH PE=1 SV=4
P10096|G3P_BOVIN	AAFNSGKVDIV	18	28	5193	32.806	2	560.803	1119.59	-1.13657	55.4	Glyceraldehyde-3-phosphate dehydrogenase OS=Bos taurus GN=GAPDH PE=1 SV=4
P10096|G3P_BOVIN	NSGKVDIV	21	28	216	18.7954	2	416.231	830.448	-2.36712	53.71	Glyceraldehyde-3-phosphate dehydrogenase OS=Bos taurus GN=GAPDH PE=1 SV=4
P10096|G3P_BOVIN	PFIDLH	33	38	1653	31.9602	2	371.2	740.386	-0.071237	42.12	Glyceraldehyde-3-phosphate dehydrogenase OS=Bos taurus GN=GAPDH PE=1 SV=4
P10096|G3P_BOVIN	MFQYDSTHG	43	51	2230	22.3907	2	543.221	1084.43	-0.260117	49.05	Glyceraldehyde-3-phosphate dehydrogenase OS=Bos taurus GN=GAPDH PE=1 SV=4
P10096|G3P_BOVIN	VIISAPS	116	122	2091	25.0782	2	343.708	685.401	0.236448	68.08	Glyceraldehyde-3-phosphate dehydrogenase OS=Bos taurus GN=GAPDH PE=1 SV=4
P10096|G3P_BOVIN	VIISAPSADAPM	116	127	6296	29.9487	2	594.302	1186.59	-0.426636	64.32	Glyceraldehyde-3-phosphate dehydrogenase OS=Bos taurus GN=GAPDH PE=1 SV=4
P10096|G3P_BOVIN	TVDGPSGKL	184	192	1867	18.0471	2	437.238	872.461	0.828733	47.46	Glyceraldehyde-3-phosphate dehydrogenase OS=Bos taurus GN=GAPDH PE=1 SV=4
P10096|G3P_BOVIN	GAAQNIIPA	198	206	428	28.3677	2	427.74	853.466	0.0501286	41.33	Glyceraldehyde-3-phosphate dehydrogenase OS=Bos taurus GN=GAPDH PE=1 SV=4
P10096|G3P_BOVIN	KYDEIK	251	256	1947	8.79302	2	398.213	794.412	-6.66415	42.67	Glyceraldehyde-3-phosphate dehydrogenase OS=Bos taurus GN=GAPDH PE=1 SV=4
P10096|G3P_BOVIN	ALNDHF	299	304	1308	21.1586	2	358.672	715.33	2.03069	42.78	Glyceraldehyde-3-phosphate dehydrogenase OS=Bos taurus GN=GAPDH PE=1 SV=4
Collagen alpha-1(I) chain OS=Bos taurus GN=COL1A1 PE=1 SV=3
Accession	peptide sequence	Start_pos	end_pos	progenesis peptide number	Retention time (min)	Charge	m/z	Measured mass	Mass error (ppm)	Score	Description
P02453|CO1A1_BOVIN	GPAGPQGPR	1083	1091	3805	9.06778	2	418.722	835.43	-0.372267	48.94	Collagen alpha-1(I) chain OS=Bos taurus GN=COL1A1 PE=1 SV=3
P02453|CO1A1_BOVIN	GETGPAGPAGPIGPVGA	1065	1081	6368	33.239	2	702.859	1403.7	-1.07258	83.86	Collagen alpha-1(I) chain OS=Bos taurus GN=COL1A1 PE=1 SV=3
Sarcoplasmic/endoplasmic reticulum calcium ATPase 1 OS=Bos taurus GN=ATP2A1 PE=1 SV=1
Accession	peptide sequence	Start_pos	end_pos	progenesis peptide number	Retention time (min)	Charge	m/z	Measured mass	Mass error (ppm)	Score	Description
Q0VCY0|AT2A1_BOVIN	VAVGDKVPADI	152	162	7072	29.9487	2	542.305	1082.6	-0.834337	61.81	Sarcoplasmic/endoplasmic reticulum calcium ATPase 1 OS=Bos taurus GN=ATP2A1 PE=1 SV=1
Q0VCY0|AT2A1_BOVIN	AVGDKVPA	153	160	2317	13.0234	2	378.716	755.418	-0.190926	40.56	Sarcoplasmic/endoplasmic reticulum calcium ATPase 1 OS=Bos taurus GN=ATP2A1 PE=1 SV=1
Q0VCY0|AT2A1_BOVIN	AVGDKVPADI	153	162	687	25.9424	2	492.771	983.527	-1.40083	64.06	Sarcoplasmic/endoplasmic reticulum calcium ATPase 1 OS=Bos taurus GN=ATP2A1 PE=1 SV=1
Q0VCY0|AT2A1_BOVIN	SGTNIAAGK	209	217	8100	7.77603	2	409.722	817.43	0.978006	50.28	Sarcoplasmic/endoplasmic reticulum calcium ATPase 1 OS=Bos taurus GN=ATP2A1 PE=1 SV=1
Q0VCY0|AT2A1_BOVIN	GVGTEIGK	226	233	2588	12.7503	2	380.714	759.412	-0.28988	44.66	Sarcoplasmic/endoplasmic reticulum calcium ATPase 1 OS=Bos taurus GN=ATP2A1 PE=1 SV=1
Q0VCY0|AT2A1_BOVIN	DQMAATEQDKTPL	236	248	4437	24.6569	2	724.339	1446.66	-1.17841	91.63	Sarcoplasmic/endoplasmic reticulum calcium ATPase 1 OS=Bos taurus GN=ATP2A1 PE=1 SV=1
Q0VCY0|AT2A1_BOVIN	MAATEQDKTPL	238	248	5593	21.424	2	602.796	1203.58	-1.75257	40.96	Sarcoplasmic/endoplasmic reticulum calcium ATPase 1 OS=Bos taurus GN=ATP2A1 PE=1 SV=1
Q0VCY0|AT2A1_BOVIN	TEQDKTPL	241	248	1439	14.0666	2	466.239	930.464	-1.81839	52.61	Sarcoplasmic/endoplasmic reticulum calcium ATPase 1 OS=Bos taurus GN=ATP2A1 PE=1 SV=1
Q0VCY0|AT2A1_BOVIN	KLDEFGEQLS	251	260	4049	30.5265	2	583.291	1164.57	1.15885	52.44	Sarcoplasmic/endoplasmic reticulum calcium ATPase 1 OS=Bos taurus GN=ATP2A1 PE=1 SV=1
Q0VCY0|AT2A1_BOVIN	LDEFGEQLS	252	260	3369	33.0929	2	519.244	1036.47	1.71372	60.06	Sarcoplasmic/endoplasmic reticulum calcium ATPase 1 OS=Bos taurus GN=ATP2A1 PE=1 SV=1
Q0VCY0|AT2A1_BOVIN	NDPVHGGSWI	279	288	5766	32.465	2	541.257	1080.5	-0.0634991	43.5	Sarcoplasmic/endoplasmic reticulum calcium ATPase 1 OS=Bos taurus GN=ATP2A1 PE=1 SV=1
Q0VCY0|AT2A1_BOVIN	MITGDNK	621	627	1643	7.37385	2	389.692	777.369	0.233395	43.83	Sarcoplasmic/endoplasmic reticulum calcium ATPase 1 OS=Bos taurus GN=ATP2A1 PE=1 SV=1
Q0VCY0|AT2A1_BOVIN	GENEDVADRA	641	650	6569	12.0828	2	538.235	1074.46	-1.77995	52.75	Sarcoplasmic/endoplasmic reticulum calcium ATPase 1 OS=Bos taurus GN=ATP2A1 PE=1 SV=1
Q0VCY0|AT2A1_BOVIN	GFNPPDLD	806	813	10363	33.4517	2	437.701	873.387	-0.387126	45.41	Sarcoplasmic/endoplasmic reticulum calcium ATPase 1 OS=Bos taurus GN=ATP2A1 PE=1 SV=1
Isoform 2 of Tropomyosin beta chain OS=Bos taurus GN=TPM2
Accession	peptide sequence	Start_pos	end_pos	progenesis peptide number	Retention time (min)	Charge	m/z	Measured mass	Mass error (ppm)	Score	Description
Q5KR48|TPM2_BOVIN	LKGTEDEVE	49	57	721	12.6837	2	510.249	1018.48	0.993413	45.38	Isoform 2 of Tropomyosin beta chain OS=Bos taurus GN=TPM2
Q5KR48|TPM2_BOVIN	LKGTEDEVEK	49	58	433	10.0691	3	383.199	1146.58	-1.43656	43.63	Isoform 2 of Tropomyosin beta chain OS=Bos taurus GN=TPM2
Q5KR48|TPM2_BOVIN	GTEDEVEK	51	58	4252	6.69947	2	453.706	905.397	-0.378441	47.27	Isoform 2 of Tropomyosin beta chain OS=Bos taurus GN=TPM2
Q5KR48|TPM2_BOVIN	AMKDEEK	133	139	1732	2.9747	2	425.702	849.39	-0.470317	50.52	Isoform 2 of Tropomyosin beta chain OS=Bos taurus GN=TPM2
Q5KR48|TPM2_BOVIN	HIAEDSDR	152	159	1508	4.40345	2	471.717	941.42	-0.640438	44.55	Isoform 2 of Tropomyosin beta chain OS=Bos taurus GN=TPM2
Q5KR48|TPM2_BOVIN	EKTIDDLEDEV	249	259	4376	33.239	2	653.306	1304.6	-0.64796	56.32	Isoform 2 of Tropomyosin beta chain OS=Bos taurus GN=TPM2
Q5KR48|TPM2_BOVIN	AISEELDNA	268	276	1644	24.4431	2	481.228	960.441	1.30574	65.01	Isoform 2 of Tropomyosin beta chain OS=Bos taurus GN=TPM2
Alpha-actinin-2 (Fragment) OS=Bos taurus GN=ACTN2 PE=4 SV=1
Accession	peptide sequence	Start_pos	end_pos	progenesis peptide number	Retention time (min)	Charge	m/z	Measured mass	Mass error (ppm)	Score	Description
F1MRD4|F1MRD4_BOVIN	LNKDDPIGN	161	169	5465	16.2821	2	493.25	984.486	-1.4561	60.81	Alpha-actinin-2 (Fragment) OS=Bos taurus GN=ACTN2 PE=4 SV=1
F1MRD4|F1MRD4_BOVIN	LNKDDPIGNI	161	170	1836	31.1584	2	549.793	1097.57	-0.728519	65.57	Alpha-actinin-2 (Fragment) OS=Bos taurus GN=ACTN2 PE=4 SV=1
F1MRD4|F1MRD4_BOVIN	HLDIPK	180	185	694	17.7717	2	361.713	721.412	0.0493423	51.06	Alpha-actinin-2 (Fragment) OS=Bos taurus GN=ACTN2 PE=4 SV=1
F1MRD4|F1MRD4_BOVIN	DAEDIVNTPKPDER	188	201	2988	23.0674	3	533.593	1597.76	-0.368432	53.85	Alpha-actinin-2 (Fragment) OS=Bos taurus GN=ACTN2 PE=4 SV=1
F1MRD4|F1MRD4_BOVIN	KATLPEADGE	520	529	11064	17.297	2	515.756	1029.5	-0.965137	45.54	Alpha-actinin-2 (Fragment) OS=Bos taurus GN=ACTN2 PE=4 SV=1
F1MRD4|F1MRD4_BOVIN	ATLPEADGER	521	530	3657	17.1582	2	529.759	1057.5	-1.24224	46.25	Alpha-actinin-2 (Fragment) OS=Bos taurus GN=ACTN2 PE=4 SV=1
F1MRD4|F1MRD4_BOVIN	VDPNGQGTVT	759	768	2239	13.0891	2	494.239	986.464	-3.27798	49.39	Alpha-actinin-2 (Fragment) OS=Bos taurus GN=ACTN2 PE=4 SV=1
F1MRD4|F1MRD4_BOVIN	ILASDKP	795	801	2149	14.7384	2	372.218	742.422	-0.124911	48.67	Alpha-actinin-2 (Fragment) OS=Bos taurus GN=ACTN2 PE=4 SV=1
F1MRD4|F1MRD4_BOVIN	ILASDKPY	795	802	2285	21.4948	2	453.75	905.485	-0.807775	50.53	Alpha-actinin-2 (Fragment) OS=Bos taurus GN=ACTN2 PE=4 SV=1
Phosphoglycerate kinase 1 OS=Bos taurus GN=PGK1 PE=2 SV=3
Accession	peptide sequence	Start_pos	end_pos	progenesis peptide number	Retention time (min)	Charge	m/z	Measured mass	Mass error (ppm)	Score	Description
Q3T0P6|PGK1_BOVIN	FHVEEEGK	123	130	3193	13.1574	2	487.732	973.45	-0.961259	45.99	Phosphoglycerate kinase 1 OS=Bos taurus GN=PGK1 PE=2 SV=3
Q3T0P6|PGK1_BOVIN	VNDAFGTAH	161	169	2833	15.8087	2	466.217	930.419	-0.345666	47.43	Phosphoglycerate kinase 1 OS=Bos taurus GN=PGK1 PE=2 SV=3
Q3T0P6|PGK1_BOVIN	VGVNLPK	176	182	2912	23.5498	2	363.729	725.444	-0.126841	40.13	Phosphoglycerate kinase 1 OS=Bos taurus GN=PGK1 PE=2 SV=3
Q3T0P6|PGK1_BOVIN	ALESPERPF	199	207	1145	29.3029	2	523.268	1044.52	-2.85591	52.49	Phosphoglycerate kinase 1 OS=Bos taurus GN=PGK1 PE=2 SV=3
Q3T0P6|PGK1_BOVIN	SNMLDKV	224	230	1546	24.1656	2	403.707	805.4	0.0321968	41.93	Phosphoglycerate kinase 1 OS=Bos taurus GN=PGK1 PE=2 SV=3
Q3T0P6|PGK1_BOVIN	SLFDEEGSK	255	263	3810	22.4577	2	506.235	1010.46	-0.266707	48.12	Phosphoglycerate kinase 1 OS=Bos taurus GN=PGK1 PE=2 SV=3
Myosin-7 OS=Bos taurus GN=MYH7 PE=2 SV=1
Accession	peptide sequence	Start_pos	end_pos	progenesis peptide number	Retention time (min)	Charge	m/z	Measured mass	Mass error (ppm)	Score	Description
Q9BE39|MYH7_BOVIN	DVFVPDDKEE	35	44	831	25.2111	2	596.772	1191.53	-0.193475	45.96	Myosin-7 OS=Bos taurus GN=MYH7 PE=2 SV=1
Q9BE39|MYH7_BOVIN	EDQVLQQNPPK	72	82	7171	18.2523	2	648.332	1294.65	-1.80259	56.42	Myosin-7 OS=Bos taurus GN=MYH7 PE=2 SV=1
Q9BE39|MYH7_BOVIN	SEAPPHI	147	153	1290	19.1428	2	375.693	749.371	0.063271	43.09	Myosin-7 OS=Bos taurus GN=MYH7 PE=2 SV=1
Q9BE39|MYH7_BOVIN	EDQIIQANPA	216	225	4527	25.0082	2	549.775	1097.53	-0.411203	50.62	Myosin-7 OS=Bos taurus GN=MYH7 PE=2 SV=1
Q9BE39|MYH7_BOVIN	EEQAEPDGTEEADK	369	382	7590	11.2655	2	774.324	1546.63	4.20694	41.17	Myosin-7 OS=Bos taurus GN=MYH7 PE=2 SV=1
Q9BE39|MYH7_BOVIN	EEQAEPDGTEEADKS	369	383	3195	11.6867	2	817.836	1633.66	-1.26653	64.96	Myosin-7 OS=Bos taurus GN=MYH7 PE=2 SV=1
Q9BE39|MYH7_BOVIN	EEQAEPDGTEEADKSA	369	384	12555	13.8646	2	853.355	1704.7	-0.55659	55.96	Myosin-7 OS=Bos taurus GN=MYH7 PE=2 SV=1
Q9BE39|MYH7_BOVIN	IDLIEKPMG	520	528	3765	32.9536	2	508.278	1014.54	0.480615	49.91	Myosin-7 OS=Bos taurus GN=MYH7 PE=2 SV=1
Q9BE39|MYH7_BOVIN	AGFDTPIEK	624	632	919	24.6569	2	489.25	976.486	-0.598238	49.41	Myosin-7 OS=Bos taurus GN=MYH7 PE=2 SV=1
Q9BE39|MYH7_BOVIN	LLGSLDIDHNQ	744	754	5427	32.7337	2	612.814	1223.61	-0.936946	73.48	Myosin-7 OS=Bos taurus GN=MYH7 PE=2 SV=1
Q9BE39|MYH7_BOVIN	SAETEKEI	841	848	4369	11.4766	2	453.724	905.433	-1.13438	50.93	Myosin-7 OS=Bos taurus GN=MYH7 PE=2 SV=1
Q9BE39|MYH7_BOVIN	AEQDNLADAEER	892	903	3103	17.297	2	680.802	1359.59	-1.24642	80.48	Myosin-7 OS=Bos taurus GN=MYH7 PE=2 SV=1
Q9BE39|MYH7_BOVIN	LEDEEEMNAEL	925	935	7558	32.806	2	661.276	1320.54	-1.09966	84.53	Myosin-7 OS=Bos taurus GN=MYH7 PE=2 SV=1
Q9BE39|MYH7_BOVIN	LEDEEEMNAELT	925	936	5919	31.0099	2	711.8	1421.59	-0.629772	69.57	Myosin-7 OS=Bos taurus GN=MYH7 PE=2 SV=1
Q9BE39|MYH7_BOVIN	ALDDLQAEEDKV	1005	1016	1104	31.3717	2	673.327	1344.64	-1.19089	85.71	Myosin-7 OS=Bos taurus GN=MYH7 PE=2 SV=1
Q9BE39|MYH7_BOVIN	ALDDLQAEEDKVNT	1005	1018	2554	29.5814	2	780.872	1559.73	-1.83197	60.26	Myosin-7 OS=Bos taurus GN=MYH7 PE=2 SV=1
Q9BE39|MYH7_BOVIN	KKDFELN	1081	1087	3186	15.0109	2	447.24	892.465	-0.274803	44.64	Myosin-7 OS=Bos taurus GN=MYH7 PE=2 SV=1
Q9BE39|MYH7_BOVIN	IEDEQALGSQLQK	1093	1105	7593	26.4727	2	729.875	1457.73	-1.06247	84.87	Myosin-7 OS=Bos taurus GN=MYH7 PE=2 SV=1
Q9BE39|MYH7_BOVIN	KLELDDVTSN	1224	1233	826	25.9424	2	567.287	1132.56	-1.16516	63.83	Myosin-7 OS=Bos taurus GN=MYH7 PE=2 SV=1
Q9BE39|MYH7_BOVIN	TLEDQMNEH	1250	1258	1919	16.9539	2	558.733	1115.45	-2.86166	54.65	Myosin-7 OS=Bos taurus GN=MYH7 PE=2 SV=1
Q9BE39|MYH7_BOVIN	SVNDLTSQ	1268	1275	5565	15.2746	2	432.209	862.403	-0.658847	46.18	Myosin-7 OS=Bos taurus GN=MYH7 PE=2 SV=1
Q9BE39|MYH7_BOVIN	LQTENGELS	1279	1287	2294	17.7025	2	495.74	989.466	-0.124777	54.82	Myosin-7 OS=Bos taurus GN=MYH7 PE=2 SV=1
Q9BE39|MYH7_BOVIN	REQYEEETEA	1343	1352	4430	14.0666	2	642.272	1282.53	-0.908203	43.2	Myosin-7 OS=Bos taurus GN=MYH7 PE=2 SV=1
Q9BE39|MYH7_BOVIN	REQYEEETEAK	1343	1353	2331	10.9301	2	706.319	1410.62	-1.31368	72.01	Myosin-7 OS=Bos taurus GN=MYH7 PE=2 SV=1
Q9BE39|MYH7_BOVIN	LQDAEEAVEAV	1396	1406	989	32.6021	2	587.285	1172.56	0.103925	58.56	Myosin-7 OS=Bos taurus GN=MYH7 PE=2 SV=1
Q9BE39|MYH7_BOVIN	TEQLGSSGK	1512	1520	5446	6.49435	2	453.729	905.444	-1.25823	50.74	Myosin-7 OS=Bos taurus GN=MYH7 PE=2 SV=1
Q9BE39|MYH7_BOVIN	KLAEKDEEMEQA	1574	1585	2280	14.7384	2	710.834	1419.65	-1.00709	46.26	Myosin-7 OS=Bos taurus GN=MYH7 PE=2 SV=1
Q9BE39|MYH7_BOVIN	LAEKDEEMEQA	1575	1585	1924	16.562	2	646.787	1291.56	-0.975263	46.06	Myosin-7 OS=Bos taurus GN=MYH7 PE=2 SV=1
Q9BE39|MYH7_BOVIN	ANDDLKEN	1662	1669	7507	6.2106	2	459.711	917.408	-0.6763	47.91	Myosin-7 OS=Bos taurus GN=MYH7 PE=2 SV=1
Q9BE39|MYH7_BOVIN	ANDDLKENIAI	1662	1672	2773	31.7367	2	608.313	1214.61	-2.573	44.62	Myosin-7 OS=Bos taurus GN=MYH7 PE=2 SV=1
Q9BE39|MYH7_BOVIN	NMEQTIK	1784	1790	1288	13.6054	2	432.219	862.424	2.18977	40.03	Myosin-7 OS=Bos taurus GN=MYH7 PE=2 SV=1
Q9BE39|MYH7_BOVIN	VRELENELEAEQ	1818	1829	5066	27.5796	2	729.857	1457.7	-0.329124	64.8	Myosin-7 OS=Bos taurus GN=MYH7 PE=2 SV=1
Q9BE39|MYH7_BOVIN	VRELENELEAEQK	1818	1830	4288	24.5831	3	529.604	1585.79	-1.91938	55.37	Myosin-7 OS=Bos taurus GN=MYH7 PE=2 SV=1
Q9BE39|MYH7_BOVIN	ELENELEAEQK	1820	1830	2373	23.6861	2	666.318	1330.62	-2.87002	82.67	Myosin-7 OS=Bos taurus GN=MYH7 PE=2 SV=1
L-lactate dehydrogenase A chain OS=Bos taurus GN=LDHA PE=2 SV=2
Accession	peptide sequence	Start_pos	end_pos	progenesis peptide number	Retention time (min)	Charge	m/z	Measured mass	Mass error (ppm)	Score	Description
P19858|LDHA_BOVIN	KEEHVPQ	13	19	1300	5.7865	2	433.722	865.429	-0.941028	46.52	L-lactate dehydrogenase A chain OS=Bos taurus GN=LDHA PE=2 SV=2
P19858|LDHA_BOVIN	KEEHVPQN	13	20	1918	5.22008	2	490.743	979.471	-1.25977	46.06	L-lactate dehydrogenase A chain OS=Bos taurus GN=LDHA PE=2 SV=2
P19858|LDHA_BOVIN	EEHVPQN	14	20	2324	7.44202	2	426.696	851.377	0.0576552	41.83	L-lactate dehydrogenase A chain OS=Bos taurus GN=LDHA PE=2 SV=2
P19858|LDHA_BOVIN	MKDLADEV	40	47	3132	26.8846	2	460.723	919.431	-1.01637	41.63	L-lactate dehydrogenase A chain OS=Bos taurus GN=LDHA PE=2 SV=2
P19858|LDHA_BOVIN	KDLADEV	41	47	2107	20.4736	2	395.203	788.392	0.873964	41.92	L-lactate dehydrogenase A chain OS=Bos taurus GN=LDHA PE=2 SV=2
P19858|LDHA_BOVIN	KFIIPN	117	122	1225	29.3029	2	366.226	730.438	0.217823	44.87	L-lactate dehydrogenase A chain OS=Bos taurus GN=LDHA PE=2 SV=2
P19858|LDHA_BOVIN	KNLHPELGTDADKEQ	211	225	2033	16.3492	3	565.616	1693.83	-0.911591	69.24	L-lactate dehydrogenase A chain OS=Bos taurus GN=LDHA PE=2 SV=2
P19858|LDHA_BOVIN	NLHPELGTDADKEQ	212	225	819	20.1449	2	783.872	1565.73	-1.23786	65.18	L-lactate dehydrogenase A chain OS=Bos taurus GN=LDHA PE=2 SV=2
P19858|LDHA_BOVIN	NLHPELGTDADKEQW	212	226	2006	32.6021	3	584.944	1751.81	-0.587131	41.74	L-lactate dehydrogenase A chain OS=Bos taurus GN=LDHA PE=2 SV=2
Troponin T, slow skeletal muscle OS=Bos taurus GN=TNNT1 PE=2 SV=3
Accession	peptide sequence	Start_pos	end_pos	progenesis peptide number	Retention time (min)	Charge	m/z	Measured mass	Mass error (ppm)	Score	Description
Q8MKH6|TNNT1_BOVIN	EAAEEEEEAPEEPEPA	17	32	5915	22.7377	2	878.362	1754.71	5.52309	44.9	Troponin T, slow skeletal muscle OS=Bos taurus GN=TNNT1 PE=2 SV=3
Q8MKH6|TNNT1_BOVIN	VDFDDIH	61	67	1748	26.0701	2	430.693	859.37	-0.874856	40.67	Troponin T, slow skeletal muscle OS=Bos taurus GN=TNNT1 PE=2 SV=3
Q8MKH6|TNNT1_BOVIN	NIDHMGEEQ	194	202	1746	14.2637	2	536.721	1071.43	-1.36015	63.31	Troponin T, slow skeletal muscle OS=Bos taurus GN=TNNT1 PE=2 SV=3
Q8MKH6|TNNT1_BOVIN	NIDHMGEEQL	194	203	6557	27.0906	2	593.264	1184.51	0.0196034	46.74	Troponin T, slow skeletal muscle OS=Bos taurus GN=TNNT1 PE=2 SV=3
Myoglobin OS=Bos taurus GN=MB PE=1 SV=3
Accession	peptide sequence	Start_pos	end_pos	progenesis peptide number	Retention time (min)	Charge	m/z	Measured mass	Mass error (ppm)	Score	Description
P02192|MYG_BOVIN	GLSDGEWQ	1	8	614	26.3427	2	446.196	890.378	0.748953	51.65	Myoglobin OS=Bos taurus GN=MB PE=1 SV=3
P02192|MYG_BOVIN	VEADVAGH	17	24	17	10.0022	2	399.193	796.372	0.204495	42.8	Myoglobin OS=Bos taurus GN=MB PE=1 SV=3
P02192|MYG_BOVIN	LFTGHPET	32	39	165	20.1449	2	451.224	900.434	-0.0466717	43.85	Myoglobin OS=Bos taurus GN=MB PE=1 SV=3
P02192|MYG_BOVIN	TALGGILK	70	77	195	30.4544	2	386.75	771.485	-0.859368	46.46	Myoglobin OS=Bos taurus GN=MB PE=1 SV=3
P02192|MYG_BOVIN	ALGGILK	71	77	1122	27.0191	2	336.226	670.438	-0.235514	53.44	Myoglobin OS=Bos taurus GN=MB PE=1 SV=3
P02192|MYG_BOVIN	KGHHEAE	79	85	7356	1.7139	2	404.19	806.365	-2.61933	57.34	Myoglobin OS=Bos taurus GN=MB PE=1 SV=3
P02192|MYG_BOVIN	HLAESH	88	93	83	3.16717	2	347.169	692.324	-0.175798	40.31	Myoglobin OS=Bos taurus GN=MB PE=1 SV=3
P02192|MYG_BOVIN	SDAIIHV	108	114	678	27.3706	2	377.708	753.402	0.118624	51.03	Myoglobin OS=Bos taurus GN=MB PE=1 SV=3
P02192|MYG_BOVIN	HPSDFGADA	119	127	2335	15.0109	2	458.693	915.372	-0.575903	45.44	Myoglobin OS=Bos taurus GN=MB PE=1 SV=3
P02192|MYG_BOVIN	HPSDFGADAQ	119	128	717	13.6723	2	522.722	1043.43	-1.21386	47.84	Myoglobin OS=Bos taurus GN=MB PE=1 SV=3
Myosin regulatory light chain 2, ventricular/cardiac muscle isoform OS=Bos taurus GN=MYL2 PE=4 SV=1
Accession	peptide sequence	Start_pos	end_pos	progenesis peptide number	Retention time (min)	Charge	m/z	Measured mass	Mass error (ppm)	Score	Description
F1ME15|F1ME15_BOVIN	VNVKNEEIDEM	58	68	4468	26.6129	2	660.312	1318.61	1.11617	52.52	Myosin regulatory light chain 2, ventricular/cardiac muscle isoform OS=Bos taurus GN=MYL2 PE=4 SV=1
F1ME15|F1ME15_BOVIN	LKGADPEETIL	89	99	7346	32.465	2	593.32	1184.63	-2.64772	60.99	Myosin regulatory light chain 2, ventricular/cardiac muscle isoform OS=Bos taurus GN=MYL2 PE=4 SV=1
F1ME15|F1ME15_BOVIN	FSKEEIDQM	129	137	728	26.7536	2	563.758	1125.5	-0.488295	61.75	Myosin regulatory light chain 2, ventricular/cardiac muscle isoform OS=Bos taurus GN=MYL2 PE=4 SV=1
Glucose-6-phosphate isomerase OS=Bos taurus GN=GPI PE=2 SV=4
Accession	peptide sequence	Start_pos	end_pos	progenesis peptide number	Retention time (min)	Charge	m/z	Measured mass	Mass error (ppm)	Score	Description
Q3ZBD7|G6PI_BOVIN	FQQGDMESNGK	351	361	3865	13.0234	2	620.766	1239.52	-1.15885	56.56	Glucose-6-phosphate isomerase OS=Bos taurus GN=GPI PE=2 SV=4
Q3ZBD7|G6PI_BOVIN	KIEPELDGSSPV	523	534	1639	29.8754	2	635.829	1269.64	-0.715827	56.26	Glucose-6-phosphate isomerase OS=Bos taurus GN=GPI PE=2 SV=4
Myosin light chain 1/3, skeletal muscle isoform OS=Bos taurus GN=MYL1 PE=2 SV=1
Accession	peptide sequence	Start_pos	end_pos	progenesis peptide number	Retention time (min)	Charge	m/z	Measured mass	Mass error (ppm)	Score	Description
A0JNJ5|MYL1_BOVIN	AAPAPAPAPA	13	22	1527	16.8236	2	417.228	832.441	-4.51271	44.95	Myosin light chain 1/3, skeletal muscle isoform OS=Bos taurus GN=MYL1 PE=2 SV=1
A0JNJ5|MYL1_BOVIN	AAPAPAPAPAPA	13	24	1451	20.1449	2	501.274	1000.53	0.0234379	57.77	Myosin light chain 1/3, skeletal muscle isoform OS=Bos taurus GN=MYL1 PE=2 SV=1
A0JNJ5|MYL1_BOVIN	PAPAPAPAPPKEE	21	33	3348	19.1428	2	636.334	1270.65	-1.39599	67.21	Myosin light chain 1/3, skeletal muscle isoform OS=Bos taurus GN=MYL1 PE=2 SV=1
A0JNJ5|MYL1_BOVIN	PAPAPAPAPPKEEK	21	34	950	16.1508	3	467.257	1398.75	-0.984925	45.62	Myosin light chain 1/3, skeletal muscle isoform OS=Bos taurus GN=MYL1 PE=2 SV=1
A0JNJ5|MYL1_BOVIN	PAPAPAPPK	23	31	1174	13.7317	2	423.248	844.481	0.698961	43.05	Myosin light chain 1/3, skeletal muscle isoform OS=Bos taurus GN=MYL1 PE=2 SV=1
A0JNJ5|MYL1_BOVIN	PAPAPAPPKEE	23	33	2691	16.562	2	552.29	1102.56	-0.90638	55.44	Myosin light chain 1/3, skeletal muscle isoform OS=Bos taurus GN=MYL1 PE=2 SV=1
A0JNJ5|MYL1_BOVIN	PAPAPAPPKEEK	23	34	2976	13.4833	2	616.337	1230.66	-0.81293	57.85	Myosin light chain 1/3, skeletal muscle isoform OS=Bos taurus GN=MYL1 PE=2 SV=1
A0JNJ5|MYL1_BOVIN	PAPAPPKEEK	25	34	2725	10.5344	2	532.292	1062.57	-1.87517	46.75	Myosin light chain 1/3, skeletal muscle isoform OS=Bos taurus GN=MYL1 PE=2 SV=1
A0JNJ5|MYL1_BOVIN	AIKIEFS	39	45	6826	32.395	2	404.234	806.454	-0.132137	45.38	Myosin light chain 1/3, skeletal muscle isoform OS=Bos taurus GN=MYL1 PE=2 SV=1
A0JNJ5|MYL1_BOVIN	QQQDEFKEA	47	55	2559	14.9387	2	561.756	1121.5	-0.459556	43.19	Myosin light chain 1/3, skeletal muscle isoform OS=Bos taurus GN=MYL1 PE=2 SV=1
A0JNJ5|MYL1_BOVIN	KVLGNPSNEEM	90	100	415	21.7651	2	609.295	1216.58	-0.421594	60.93	Myosin light chain 1/3, skeletal muscle isoform OS=Bos taurus GN=MYL1 PE=2 SV=1
A0JNJ5|MYL1_BOVIN	VLGNPSNEEM	91	100	220	25.2738	2	545.247	1088.48	-0.416322	72.24	Myosin light chain 1/3, skeletal muscle isoform OS=Bos taurus GN=MYL1 PE=2 SV=1
A0JNJ5|MYL1_BOVIN	VLGNPSNEEMNA	91	102	1096	25.1449	2	637.787	1273.56	-0.650457	59.54	Myosin light chain 1/3, skeletal muscle isoform OS=Bos taurus GN=MYL1 PE=2 SV=1
A0JNJ5|MYL1_BOVIN	GNPSNEEM	93	100	3446	11.6867	2	439.171	876.328	-0.312418	53.79	Myosin light chain 1/3, skeletal muscle isoform OS=Bos taurus GN=MYL1 PE=2 SV=1
A0JNJ5|MYL1_BOVIN	KIEFE	104	108	192	19.9415	2	333.179	664.343	-0.459799	41.59	Myosin light chain 1/3, skeletal muscle isoform OS=Bos taurus GN=MYL1 PE=2 SV=1
A0JNJ5|MYL1_BOVIN	AISNNKDQGT	116	125	2075	4.60373	2	524.257	1046.5	-0.666823	62.28	Myosin light chain 1/3, skeletal muscle isoform OS=Bos taurus GN=MYL1 PE=2 SV=1
A0JNJ5|MYL1_BOVIN	AISNNKDQGTYE	116	127	3936	12.2769	2	670.308	1338.6	-2.26606	80.63	Myosin light chain 1/3, skeletal muscle isoform OS=Bos taurus GN=MYL1 PE=2 SV=1
A0JNJ5|MYL1_BOVIN	AISNNKDQGTYEDFVEG	116	132	6548	31.8111	2	943.923	1885.83	-0.810737	70.57	Myosin light chain 1/3, skeletal muscle isoform OS=Bos taurus GN=MYL1 PE=2 SV=1
A0JNJ5|MYL1_BOVIN	SNNKDQGTYEDFVEG	118	132	3693	29.3742	2	851.862	1701.71	-0.889222	60.34	Myosin light chain 1/3, skeletal muscle isoform OS=Bos taurus GN=MYL1 PE=2 SV=1
A0JNJ5|MYL1_BOVIN	DQGTYEDFVEG	122	132	3269	32.9536	2	630.257	1258.5	-0.272558	53.73	Myosin light chain 1/3, skeletal muscle isoform OS=Bos taurus GN=MYL1 PE=2 SV=1
A0JNJ5|MYL1_BOVIN	VFDKEGNGTV	135	144	1357	18.0471	2	533.264	1064.51	-0.301015	74.23	Myosin light chain 1/3, skeletal muscle isoform OS=Bos taurus GN=MYL1 PE=2 SV=1
A0JNJ5|MYL1_BOVIN	VFDKEGNGTVM	135	145	440	23.8879	2	598.784	1195.55	-0.527928	72.7	Myosin light chain 1/3, skeletal muscle isoform OS=Bos taurus GN=MYL1 PE=2 SV=1
A0JNJ5|MYL1_BOVIN	VFDKEGNGTVMG	135	146	2956	22.8732	2	627.296	1252.58	1.16967	84.55	Myosin light chain 1/3, skeletal muscle isoform OS=Bos taurus GN=MYL1 PE=2 SV=1
A0JNJ5|MYL1_BOVIN	VFDKEGNGTVMGA	135	147	2954	25.1449	2	662.813	1323.61	-1.13147	94.35	Myosin light chain 1/3, skeletal muscle isoform OS=Bos taurus GN=MYL1 PE=2 SV=1
A0JNJ5|MYL1_BOVIN	DKEGNGTV	137	144	12694	4.47537	2	410.196	818.377	0.607561	47.13	Myosin light chain 1/3, skeletal muscle isoform OS=Bos taurus GN=MYL1 PE=2 SV=1
A0JNJ5|MYL1_BOVIN	DKEGNGTVMG	137	146	5485	9.93523	2	504.227	1006.44	1.00984	55.34	Myosin light chain 1/3, skeletal muscle isoform OS=Bos taurus GN=MYL1 PE=2 SV=1
A0JNJ5|MYL1_BOVIN	MKEEEVEA	160	167	134	14.4014	2	482.718	963.421	-0.444253	52.35	Myosin light chain 1/3, skeletal muscle isoform OS=Bos taurus GN=MYL1 PE=2 SV=1
A0JNJ5|MYL1_BOVIN	MKEEEVEAL	160	168	334	25.8072	2	539.26	1076.51	-0.541741	56.94	Myosin light chain 1/3, skeletal muscle isoform OS=Bos taurus GN=MYL1 PE=2 SV=1
A0JNJ5|MYL1_BOVIN	MAGQEDSNGC	169	178	4335	9.06778	2	506.179	1010.34	0.0550337	45.21	Myosin light chain 1/3, skeletal muscle isoform OS=Bos taurus GN=MYL1 PE=2 SV=1
A0JNJ5|MYL1_BOVIN	MAGQEDSNGCI	169	179	3817	20.8173	2	562.721	1123.43	-0.51603	55.7	Myosin light chain 1/3, skeletal muscle isoform OS=Bos taurus GN=MYL1 PE=2 SV=1
A0JNJ5|MYL1_BOVIN	MAGQEDSNGCIN	169	180	1404	16.4882	2	619.742	1237.47	-0.881913	88.25	Myosin light chain 1/3, skeletal muscle isoform OS=Bos taurus GN=MYL1 PE=2 SV=1
Phosphoglycerate mutase 2 OS=Bos taurus GN=PGAM2 PE=3 SV=2
Accession	peptide sequence	Start_pos	end_pos	progenesis peptide number	Retention time (min)	Charge	m/z	Measured mass	Mass error (ppm)	Score	Description
F1N2F2|F1N2F2_BOVIN	WNDEIAPQ	166	173	1391	28.0117	2	486.725	971.435	-0.187768	48.1	Phosphoglycerate mutase 2 OS=Bos taurus GN=PGAM2 PE=3 SV=2
F1N2F2|F1N2F2_BOVIN	ELDQALKPT	218	226	1144	21.1586	2	507.776	1013.54	-1.27509	47.31	Phosphoglycerate mutase 2 OS=Bos taurus GN=PGAM2 PE=3 SV=2
F1N2F2|F1N2F2_BOVIN	ELDQALKPTKPM	218	229	2316	26.2792	2	685.87	1369.73	-1.54403	42.63	Phosphoglycerate mutase 2 OS=Bos taurus GN=PGAM2 PE=3 SV=2
Heat shock protein beta-1 OS=Bos taurus GN=HSPB1 PE=2 SV=2
Accession	peptide sequence	Start_pos	end_pos	progenesis peptide number	Retention time (min)	Charge	m/z	Measured mass	Mass error (ppm)	Score	Description
E1BEL7|E1BEL7_BOVIN	VSLDVNH	92	98	2883	18.1149	2	392.204	782.394	2.70594	42.83	Heat shock protein beta-1 OS=Bos taurus GN=HSPB1 PE=2 SV=2
E1BEL7|E1BEL7_BOVIN	TKDGVVEIT	108	116	2444	21.1586	2	481.263	960.511	-1.72411	43.99	Heat shock protein beta-1 OS=Bos taurus GN=HSPB1 PE=2 SV=2
E1BEL7|E1BEL7_BOVIN	TKDGVVEITGK	108	118	4301	17.4993	3	382.884	1145.63	-0.0792137	42.63	Heat shock protein beta-1 OS=Bos taurus GN=HSPB1 PE=2 SV=2
E1BEL7|E1BEL7_BOVIN	AQLGGPEAGK	184	193	4298	11.6867	2	464.248	926.481	-1.01509	53.65	Heat shock protein beta-1 OS=Bos taurus GN=HSPB1 PE=2 SV=2
